# Supplementary material for: Genomic expression catalogue of a global collection of BCG vaccine strains show evidence for highly diverged metabolic and cell-wall adaptations
Source: PubMed Central journal article supplement (PMC4614345; doi:10.1038/srep15443), 2015-10-21
Supplement: srep15443-s1.pdf [file srep15443-s1.pdf]

## **Genomic expression catalogue of a global collection of BCG vaccine strains show evidence for highly diverged metabolic and cell-wall adaptations.**

Abdallah M. Abdallah<sup>1‡\*</sup>, Grant A. Hill-Cawthorne<sup>1,2‡</sup>, Thomas D. Otto<sup>3</sup>, Francesc Coll<sup>4</sup>, José Afonso Guerra-Assunção<sup>4</sup>, Ge Gao<sup>1</sup>, Raece Naeem<sup>1</sup>, Hifzur Ansari<sup>1</sup>, Tareq B. Malas<sup>1</sup>, Sabir A. Adroub<sup>1</sup>, Theo Verboom<sup>5</sup>, Roy Ummels<sup>5</sup>, Huoming Zhang<sup>6</sup>, Aswini Kumar Panigrahi<sup>6</sup>, Ruth McNerney<sup>4</sup>, Roland Brosch<sup>7</sup>, Taane G. Clark<sup>4,8</sup>, Marcel A. Behr<sup>9</sup>, Wilbert Bitter<sup>5</sup>, Arnab Pain<sup>1,10\*</sup>

### **Supplementary Tables and Figures legends**

Table S1: Numbers of SNPs, small Indels and Unique Variants identified in *M. bovis* and fourteen BCG strains compared to *M. bovis* AF2122/97<sup>1</sup>.

Table S2: List of identified SNPs in fourteen BCG strains compared to *M. bovis* AF2122/97<sup>1</sup> with their types.

Table S3: Distribution of regions of difference and deleted genes in the genomes of fourteen BCG strains compared to *M. bovis* AF2122/97<sup>1</sup>.

Table S4: The lengths and positions of *leuA* gene insertions in *M. bovis* AF2122/97<sup>1</sup> and BCG strains.

Table S5: Sequences insertion in fourteen BCG strains compared to *M. bovis* AF2122/97<sup>1</sup>. Insertions were detected by performing *de novo* assembly and aligning resulting contigs to the reference genome (*M. bovis* AF2122/97<sup>1</sup>).

Table S6: Pearson correlation coefficients between the biological replicates of RNA-seq transcriptome data. Analysis was done in R with cor function, using the log read counts.

Table S7: Proteomic profiling of BCG Japan, Birkahug, Pasteur, Phipps and Danish compared to *M. bovis*.

Table S8: Oligonucleotide primers used for reverse-transcription quantitative PCR. The table shows the gene symbol for the investigated transcripts and sequences for forward/backward primer.

Figure S1: nRD18 deletion from BCG china strains (this study and Zhang et al.,<sup>2</sup>) confirmed by ACT comparison<sup>3,4</sup> with reference *M. bovis*. An ACT screenshot is shown with BlastN comparison.

Figure S2: Sequence duplication across different regions shown using Artemis Bam view<sup>3</sup> confirmed by CNVnator<sup>5</sup>. Individual gene annotations are shown. A) Direct repeat at *CRISPR-Cas* locus on strains BCG japan (blue), BCG Moreau (green), BCG Russia (red) and *M. bovis* (grey). B,C) Sequence duplication in BCG Frappier (pink) strain compared with

reference *M.bovis* (green). D) Sequence duplication across all BCG strains.

Figure S3: Principal component cluster analysis (PCA) of biological replicates of RNA-seq transcriptome data. PCA mapping showed clustering of biological replicates from each strain of the fourteen BCG strains and *M. bovis* AF2122/97<sup>1</sup> strain. The graph was done with plotPCA function of DESeq<sup>6</sup> using the read counts.

Figure S4: Expression profiles for all genes, showing significant changes in gene expression were clustered using the Euclidean distance algorithm.

Figure S5: Confirmation of differential gene expression during RNA-seq analysis by Q-RT-PCR. Scatterplot of the relationship between genes quantified in both data sets. Scatterplots display the rectilinear equation and coefficient of determination (R<sup>2</sup>).

Figure S6. Gene ontology (GO) analysis of the differentially expressed genes.

Heat maps representing GO enrichment of (a) Biological Processes, (b) Molecular Functions and (c) Cellular Components for all differentially expressed genes. The GO terms were clustered by their enrichment patterns ( $p < 0.001$ ). Using the Pearson correlation as the distance measure with average linkage. Up-regulation is indicated in red, down-regulation in green and was calculated with DESeq<sup>6</sup>, see Methods.

Figure S7: Expression of genes encoding proteins predicted to be involved in energy metabolism. Genes predicted to be involved in energy generation and NAD<sup>+</sup> regeneration were selected based on their annotation<sup>1</sup>. The color scales represent log<sub>2</sub>-fold changes in gene expression (DESeq<sup>6</sup>), using the *M. bovis* AF2122/97<sup>1</sup> strain as reference.

Figure S8: Transcriptional profile of a global collection of fourteen BCG strains: Gene expression heat maps of genes showing expression profiles in: (A) PE family. (B) PE\_PGRS family. (C) PPE family. The color scales represent log<sub>2</sub>-fold changes in gene expression (DESeq<sup>6</sup>), using the *M. bovis* AF2122/97<sup>1</sup> strain as reference.

Figure S9: Transcriptional profile of T cell antigen present in 14 BCG strains. Selected genes contain experimentally verified list of human T-cell antigens<sup>2,7</sup>. The color scales represent log<sub>2</sub>-fold changes in gene expression (DESeq<sup>6</sup>), using the *M. bovis* AF2122/97<sup>1</sup> strain as reference.

Figure S10: Global proteomic profiling of BCG Japan, Birkahug, Pasteur, Phipps and Danish compared to *M. bovis* AF2122/97<sup>1</sup>. Proteins displaying high differential regulation (2-fold change differences) were grouped according to the BoviList classification (<http://genolist.pasteur.fr/BoviList/>).

## References

- 1 Garnier, T. *et al.* The complete genome sequence of *Mycobacterium bovis*. *Proceedings of the National Academy of Sciences of the United States of America* **100**, 7877-7882, doi:10.1073/pnas.1130426100 (2003).
- 2 Zhang, W. *et al.* Genome sequencing and analysis of BCG vaccine strains. *Plos One* **8**, e71243, doi:10.1371/journal.pone.0071243 (2013).
- 3 Carver, T. *et al.* Artemis and ACT: viewing, annotating and comparing sequences stored in a relational database. *Bioinformatics* **24**, 2672-2676, doi:Doi 10.1093/Bioinformatics/Btn529 (2008).
- 4 Carver, T. J. *et al.* ACT: the Artemis Comparison Tool. *Bioinformatics* **21**, 3422-3423, doi:10.1093/bioinformatics/bti553 (2005).
- 5 Abyzov, A., Urban, A. E., Snyder, M. & Gerstein, M. CNVnator: an approach to discover, genotype, and characterize typical and atypical CNVs from family and population genome sequencing. *Genome research* **21**, 974-984, doi:10.1101/gr.114876.110 (2011).
- 6 Anders, S. & Huber, W. Differential expression analysis for sequence count data. *Genome biology* **11**, R106, doi:10.1186/gb-2010-11-10-r106 (2010).
- 7 Comas, I. *et al.* Human T cell epitopes of *Mycobacterium tuberculosis* are evolutionarily hyperconserved. *Nature genetics* **42**, 498-503, doi:10.1038/ng.590 (2010).

Table S1: numbers of SNPs, small Indels and Unique variants identified in this study

| Strain    | No. SNPs | No. Indels | No. unique variants |
|-----------|----------|------------|---------------------|
| M. bovis  | 9        | 12         | 5                   |
| Birkhaug  | 770      | 92         | 15                  |
| Connaught | 764      | 81         | 5                   |
| Danish    | 756      | 81         | 10                  |
| Frappier  | 772      | 54         | 13                  |
| Glaxo     | 774      | 94         | 16                  |
| Moreau    | 789      | 94         | 8                   |
| Pasteur   | 760      | 88         | 14                  |
| Phipps    | 778      | 100        | 0                   |
| Prague    | 762      | 76         | 19                  |
| Russia    | 750      | 73         | 37                  |
| Sweden    | 774      | 91         | 20                  |
| Tice      | 779      | 95         | 9                   |
| Japan     | 757      | 81         | 11                  |







|        |   |   |    |   |   |   |   |   |   |   |   |   |   |   |   |
|--------|---|---|----|---|---|---|---|---|---|---|---|---|---|---|---|
| 234188 | C | T | 14 | T | T | T | T | T | T | T | T | T | T | T | T |
| 237784 | C | G | 1  | . | . | . | . | . | . | . | . | G | . | . | . |
| 241987 | A | C | 14 | C | C | C | C | C | C | C | C | C | C | C | C |
| 247471 | A | G | 1  | . | . | . | . | . | . | . | . | G | . | . | . |
| 253243 | C | T | 14 | T | T | T | T | T | T | T | T | T | T | T | T |
| 258016 | C | A | 14 | A | A | A | A | A | A | A | A | A | A | A | A |
| 258368 | T | G | 14 | G | G | G | G | G | G | G | G | G | G | G | G |
| 264261 | T | C | 14 | C | C | C | C | C | C | C | C | C | C | C | C |
| 265198 | A | G | 14 | G | G | G | G | G | G | G | G | G | G | G | G |
| 270004 | T | C | 14 | C | C | C | C | C | C | C | C | C | C | C | C |
| 287291 | T | C | 14 | C | C | C | C | C | C | C | C | C | C | C | C |
| 288793 | T | C | 14 | C | C | C | C | C | C | C | C | C | C | C | C |
| 292467 | C | T | 14 | T | T | T | T | T | T | T | T | T | T | T | T |
| 293378 | G | A | 1  | A | . | . | . | . | . | . | . | . | . | . | . |
| 295534 | T | C | 14 | C | C | C | C | C | C | C | C | C | C | C | C |
| 302955 | G | A | 1  | . | . | . | . | . | . | . | . | A | . | . | . |
| 311426 | C | T | 14 | T | T | T | T | T | T | T | T | T | T | T | T |
| 314906 | T | C | 14 | C | C | C | C | C | C | C | C | C | C | C | C |
| 316408 | C | T | 14 | T | T | T | T | T | T | T | T | T | T | T | T |
| 321024 | T | C | 14 | C | C | C | C | C | C | C | C | C | C | C | C |
| 323242 | C | G | 14 | G | G | G | G | G | G | G | G | G | G | G | G |
| 327558 | A | G | 14 | G | G | G | G | G | G | G | G | G | G | G | G |
| 331688 | A | G | 14 | G | G | G | G | G | G | G | G | G | G | G | G |
| 331857 | G | C | 14 | C | C | C | C | C | C | C | C | C | C | C | C |
| 331860 | T | C | 14 | C | C | C | C | C | C | C | C | C | C | C | C |
| 334335 | T | C | 7  | N | C | N | C | N | N | N | C | C | N | C | N |
| 334338 | T | C | 7  | N | C | N | C | N | N | N | C | C | N | C | N |
| 336428 | C | T | 1  | . | . | . | . | . | N | . | . | . | T | . | . |
| 340112 | G | A | 6  | N | A | N | A | N | N | N | A | N | A | A | A |
| 340114 | C | T | 8  | N | T | N | T | N | T | T | N | T | N | T | N |

















|         |   |   |    |   |   |   |   |   |   |   |   |   |   |   |   |
|---------|---|---|----|---|---|---|---|---|---|---|---|---|---|---|---|
| 1206934 | A | G | 14 | G | G | G | G | G | G | G | G | G | G | G | G |
| 1214578 | T | C | 14 | C | C | C | C | C | C | C | C | C | C | C | C |
| 1214912 | A | G | 1  | - | N | - | - | - | N | - | G | - | N | - | N |
| 1214914 | C | T | 1  | - | N | - | - | - | N | - | N | - | N | - | T |
| 1216529 | C | A | 14 | A | A | A | A | A | A | A | A | A | A | A | A |
| 1228662 | A | C | 1  | . | . | . | . | . | . | . | . | . | . | . | C |
| 1230187 | A | C | 14 | C | C | C | C | C | C | C | C | C | C | C | C |
| 1230919 | G | T | 14 | T | T | T | T | T | T | T | T | T | T | T | T |
| 1237100 | C | T | 14 | T | T | T | T | T | T | T | T | T | T | T | T |
| 1241020 | T | C | 1  | . | . | C | . | . | . | . | . | . | . | . | . |
| 1244790 | G | C | 14 | C | C | C | C | C | C | C | C | C | C | C | C |
| 1247460 | G | A | 1  | . | . | A | . | . | . | . | . | . | . | . | . |
| 1259294 | T | C | 14 | C | C | C | C | C | C | C | C | C | C | C | C |
| 1277052 | G | T | 14 | T | T | T | T | T | T | T | T | T | T | T | T |
| 1278032 | C | G | 11 | G | N | G | G | G | G | N | G | G | G | G | N |
| 1278133 | G | T | 14 | T | T | T | T | T | T | T | T | T | T | T | T |
| 1283094 | C | T | 14 | T | T | T | T | T | T | T | T | T | T | T | T |
| 1284974 | C | G | 6  | G | - | N | G | G | G | G | N | - | N | - | N |
| 1284976 | C | G | 9  | G | - | G | G | G | G | N | - | G | - | G | - |
| 1286510 | A | G | 1  | . | . | . | . | . | . | . | . | . | . | . | G |
| 1286634 | G | C | 1  | . | . | C | . | . | . | . | . | . | . | . | . |
| 1294561 | C | T | 2  | . | . | . | . | . | . | T | T | . | . | . | . |
| 1295845 | T | C | 14 | C | C | C | C | C | C | C | C | C | C | C | C |
| 1295906 | G | C | 1  | . | . | . | . | . | . | . | . | . | . | . | C |
| 1319319 | G | C | 14 | C | C | C | C | C | C | C | C | C | C | C | C |
| 1335142 | T | C | 8  | C | N | N | C | N | C | C | N | N | C | C | N |
| 1339858 | C | G | 6  | G | - | G | N | - | - | G | G | - | G | - | N |
| 1339859 | A | C | 6  | C | - | C | N | - | - | C | C | - | C | - | N |
| 1340159 | C | A | 14 | A | A | A | A | A | A | A | A | A | A | A | A |
| 1340295 | G | T | 2  | . | . | T | . | . | . | . | . | T | . | . | . |











|         |   |   |    |   |   |   |   |   |   |   |   |   |   |   |   |
|---------|---|---|----|---|---|---|---|---|---|---|---|---|---|---|---|
| 1957343 | G | A | 14 | A | A | A | A | A | A | A | A | A | A | A | A |
| 1962741 | C | A | 14 | A | A | A | A | A | A | A | A | A | A | A | A |
| 1966429 | G | C | 14 | C | C | C | C | C | C | C | C | C | C | C | C |
| 1970522 | T | C | 14 | C | C | C | C | C | C | C | C | C | C | C | C |
| 1981005 | G | C | 1  | - | C | - | - | - | - | - | N | - | N | - | N |
| 1981007 | A | C | 1  | - | N | - | - | - | - | - | C | - | N | - | N |
| 1981012 | T | C | 4  | - | C | - | - | - | - | - | C | - | C | - | C |
| 1981036 | C | T | 14 | T | T | T | T | T | T | T | T | T | T | T | T |
| 1986879 | C | T | 14 | T | T | T | T | T | T | T | T | T | T | T | T |
| 1988836 | C | T | 9  | N | T | T | T | N | T | T | N | N | T | T | N |
| 1997748 | A | G | 12 | G | G | G | G | G | G | N | N | G | G | G | G |
| 2002990 | C | G | 14 | G | G | G | G | G | G | G | G | G | G | G | G |
| 2003321 | C | T | 14 | T | T | T | T | T | T | T | T | T | T | T | T |
| 2007997 | C | T | 14 | T | T | T | T | T | T | T | T | T | T | T | T |
| 2010718 | G | T | 1  | . | . | . | . | . | . | . | T | . | . | . | . |
| 2011751 | G | A | 5  | A | . | . | N | . | . | A | . | . | A | A | . |
| 2011885 | C | T | 8  | . | T | T | N | T | T | . | T | T | T | . | T |
| 2016562 | C | G | 1  | . | . | . | . | . | . | . | . | G | . | . | . |
| 2016867 | G | C | 2  | C | . | . | . | . | . | . | . | . | C | . | . |
| 2017327 | A | G | 14 | G | G | G | G | G | G | G | G | G | G | G | G |
| 2018160 | G | T | 14 | T | T | T | T | T | T | T | T | T | T | T | T |
| 2018168 | G | A | 14 | A | A | A | A | A | A | A | A | A | A | A | A |
| 2019543 | T | C | 14 | C | C | C | C | C | C | C | C | C | C | C | C |
| 2019740 | G | A | 13 | A | A | A | A | A | A | A | N | A | A | A | A |
| 2020577 | T | C | 14 | C | C | C | C | C | C | C | C | C | C | C | C |
| 2021574 | G | T | 1  | . | . | . | . | . | . | . | . | . | . | . | T |
| 2022655 | C | T | 1  | . | . | T | . | . | . | . | . | . | . | . | . |
| 2022834 | T | G | 2  | . | . | G | . | G | . | . | . | . | . | . | . |
| 2023556 | G | A | 14 | A | A | A | A | A | A | A | A | A | A | A | A |
| 2023614 | C | G | 1  | . | . | . | . | . | . | . | . | . | G | . | . |





|         |   |   |    |   |   |   |   |   |   |   |   |   |   |   |   |
|---------|---|---|----|---|---|---|---|---|---|---|---|---|---|---|---|
| 2137504 | T | C | 14 | C | C | C | C | C | C | C | C | C | C | C | C |
| 2140668 | G | A | 1  | N | . | . | N | . | . | . | . | . | A | . | . |
| 2141560 | T | C | 14 | C | C | C | C | C | C | C | C | C | C | C | C |
| 2146847 | G | A | 14 | A | A | A | A | A | A | A | A | A | A | A | A |
| 2149591 | C | T | 14 | T | T | T | T | T | T | T | T | T | T | T | T |
| 2153888 | A | C | 3  | N | C | N | N | N | N | N | N | N | C | N | C |
| 2153889 | T | C | 4  | N | C | N | N | N | N | N | C | N | C | N | C |
| 2160055 | A | G | 14 | G | G | G | G | G | G | G | G | G | G | G | G |
| 2160657 | C | A | 14 | A | A | A | A | A | A | A | A | A | A | A | A |
| 2178859 | G | C | 1  | . | . | . | . | . | . | . | . | . | . | . | C |
| 2179757 | G | A | 1  | . | . | . | . | . | . | . | A | . | . | . | . |
| 2187664 | T | C | 14 | C | C | C | C | C | C | C | C | C | C | C | C |
| 2187665 | A | C | 14 | C | C | C | C | C | C | C | C | C | C | C | C |
| 2189006 | G | C | 1  | N | N | N | N | N | N | N | C | N | N | N | N |
| 2189008 | C | A | 1  | N | N | N | N | N | N | N | A | N | N | N | N |
| 2189012 | T | C | 2  | N | C | N | N | N | N | N | C | N | N | N | N |
| 2189014 | G | C | 2  | N | C | N | N | N | N | N | C | N | N | N | N |
| 2189020 | T | C | 5  | N | C | N | C | N | C | C | N | C | N | N | N |
| 2189029 | A | G | 8  | G | G | N | G | N | G | G | N | G | G | N | N |
| 2189032 | C | A | 14 | A | A | A | A | A | A | A | A | A | A | A | A |
| 2189035 | C | A | 14 | A | A | A | A | A | A | A | A | A | A | A | A |
| 2200088 | C | G | 2  | . | N | N | N | N | N | . | N | G | G | . | N |
| 2200359 | G | A | 6  | A | N | N | A | N | N | A | N | N | A | A | N |
| 2219596 | A | C | 14 | C | C | C | C | C | C | C | C | C | C | C | C |
| 2224503 | G | A | 1  | A | . | . | . | . | . | . | . | . | . | . | . |
| 2226609 | C | T | 2  | T | . | . | . | . | . | . | . | . | T | . | . |
| 2226929 | G | A | 14 | A | A | A | A | A | A | A | A | A | A | A | A |
| 2233245 | G | A | 14 | A | A | A | A | A | A | A | A | A | A | A | A |
| 2234759 | C | T | 14 | T | T | T | T | T | T | T | T | T | T | T | T |
| 2239982 | C | G | 5  | N | - | G | - | - | - | G | - | - | G | - | G |





















|         |   |   |    |   |   |   |   |   |   |   |   |   |   |   |   |   |   |
|---------|---|---|----|---|---|---|---|---|---|---|---|---|---|---|---|---|---|
| 3484184 | G | A | 8  | N | A | A | A | N | N | N | A | A | N | A | N | A | A |
| 3489322 | T | G | 14 | G | G | G | G | G | G | G | G | G | G | G | G | G | G |
| 3491278 | C | T | 14 | T | T | T | T | T | T | T | T | T | T | T | T | T | T |
| 3491495 | G | A | 2  | A | . | . | . | . | . | . | . | . | . | A | . | . | . |
| 3492179 | A | C | 14 | C | C | C | C | C | C | C | C | C | C | C | C | C | C |
| 3493725 | C | T | 14 | T | T | T | T | T | T | T | T | T | T | T | T | T | T |
| 3513492 | G | T | 14 | T | T | T | T | T | T | T | T | T | T | T | T | T | T |
| 3516822 | G | C | 14 | C | C | C | C | C | C | C | C | C | C | C | C | C | C |
| 3519089 | G | T | 2  | . | . | T | . | T | . | . | . | . | . | . | . | . | . |
| 3522719 | G | A | 1  | A | . | . | . | . | . | . | . | . | . | . | . | . | . |
| 3523580 | C | T | 1  | . | . | . | T | . | . | . | . | . | . | . | . | . | . |
| 3542571 | C | T | 14 | T | T | T | T | T | T | T | T | T | T | T | T | T | T |
| 3544791 | A | G | 14 | G | G | G | G | G | G | G | G | G | G | G | G | G | G |
| 3545360 | C | G | 4  | - | - | - | G | - | N | G | - | - | G | - | G | - | - |
| 3545362 | A | C | 5  | N | C | N | N | N | N | N | C | C | N | C | N | C | N |
| 3545363 | G | A | 11 | A | A | A | N | A | A | A | A | A | N | A | N | A | A |
| 3553036 | C | T | 1  | T | . | . | . | . | . | . | . | . | . | . | . | . | . |
| 3554474 | G | T | 14 | T | T | T | T | T | T | T | T | T | T | T | T | T | T |
| 3558607 | A | G | 14 | G | G | G | G | G | G | G | G | G | G | G | G | G | G |
| 3563308 | A | G | 14 | G | G | G | G | G | G | G | G | G | G | G | G | G | G |
| 3565019 | C | A | 1  | . | . | . | . | . | . | . | . | . | . | . | . | . | A |
| 3569787 | T | C | 14 | C | C | C | C | C | C | C | C | C | C | C | C | C | C |
| 3576729 | A | G | 14 | G | G | G | G | G | G | G | G | G | G | G | G | G | G |
| 3578155 | G | C | 14 | C | C | C | C | C | C | C | C | C | C | C | C | C | C |
| 3578761 | G | T | 1  | . | . | . | . | . | . | . | . | . | T | . | . | . | . |
| 3583866 | T | C | 14 | C | C | C | C | C | C | C | C | C | C | C | C | C | C |
| 3595234 | T | C | 1  | . | . | . | . | . | C | . | . | . | . | . | . | . | . |
| 3608842 | C | T | 1  | . | . | . | N | . | T | . | . | . | . | . | . | . | . |
| 3608993 | G | A | 14 | A | A | A | A | A | A | A | A | A | A | A | A | A | A |
| 3609328 | C | T | 2  | T | . | . | . | . | . | . | . | . | . | T | . | . | . |







|         |   |   |    |   |   |   |   |   |   |   |   |   |   |   |   |   |   |
|---------|---|---|----|---|---|---|---|---|---|---|---|---|---|---|---|---|---|
| 3889646 | C | G | 8  | G | G | G | N | G | N | N | N | G | N | G | G | G | N |
| 3891002 | G | A | 3  | N | N | N | A | N | N | N | A | N | N | N | N | N | A |
| 3892351 | A | G | 1  | N | G | N | N | N | N | N | N | N | N | N | N | N | N |
| 3902325 | A | G | 14 | G | G | G | G | G | G | G | G | G | G | G | G | G | G |
| 3905771 | G | A | 1  | . | . | . | . | . | . | . | . | . | . | . | . | . | A |
| 3909846 | C | T | 14 | T | T | T | T | T | T | T | T | T | T | T | T | T | T |
| 3932547 | C | T | 14 | T | T | T | T | T | T | T | T | T | T | T | T | T | T |
| 3953110 | C | T | 14 | T | T | T | T | T | T | T | T | T | T | T | T | T | T |
| 3953716 | G | A | 1  | . | . | . | . | . | . | . | . | A | . | . | . | . | . |
| 3965303 | T | C | 14 | C | C | C | C | C | C | C | C | C | C | C | C | C | C |
| 3968207 | C | T | 14 | T | T | T | T | T | T | T | T | T | T | T | T | T | T |
| 3968948 | T | C | 1  | . | . | . | . | . | . | . | . | . | . | . | . | . | C |
| 3973699 | G | A | 14 | A | A | A | A | A | A | A | A | A | A | A | A | A | A |
| 3978421 | A | G | 14 | G | G | G | G | G | G | G | G | G | G | G | G | G | G |
| 3978921 | T | C | 1  | . | . | . | . | . | . | . | . | . | . | . | . | C | . |
| 3984600 | C | G | 14 | G | G | G | G | G | G | G | G | G | G | G | G | G | G |
| 3991459 | A | G | 14 | G | G | G | G | G | G | G | G | G | G | G | G | G | G |
| 3992000 | G | C | 14 | C | C | C | C | C | C | C | C | C | C | C | C | C | C |
| 3999273 | G | A | 14 | A | A | A | A | A | A | A | A | A | A | A | A | A | A |
| 3999720 | G | A | 14 | A | A | A | A | A | A | A | A | A | A | A | A | A | A |
| 3999788 | G | A | 14 | A | A | A | A | A | A | A | A | A | A | A | A | A | A |
| 4001003 | C | T | 8  | . | T | T | N | T | T | . | T | T | T | . | . | T | . |
| 4001036 | T | C | 14 | C | C | C | C | C | C | C | C | C | C | C | C | C | C |
| 4006573 | T | C | 14 | C | C | C | C | C | C | C | C | C | C | C | C | C | C |
| 4014113 | T | C | 14 | C | C | C | C | C | C | C | C | C | C | C | C | C | C |
| 4022838 | G | A | 14 | A | A | A | A | A | A | A | A | A | A | A | A | A | A |
| 4026017 | G | C | 4  | . | C | . | . | . | . | C | C | . | . | . | C | . | . |
| 4028272 | G | A | 14 | A | A | A | A | A | A | A | A | A | A | A | A | A | A |
| 4028718 | G | A | 14 | A | A | A | A | A | A | A | A | A | A | A | A | A | A |
| 4031931 | C | A | 2  | - | A | - | - | - | N | - | A | - | - | - | - | - | - |





|         |   |   |    |   |   |   |   |   |   |   |   |   |   |   |   |
|---------|---|---|----|---|---|---|---|---|---|---|---|---|---|---|---|
| 4159498 | C | G | 1  | . | . | . | . | . | . | . | . | . | . | G | . |
| 4174869 | C | A | 14 | A | A | A | A | A | A | A | A | A | A | A | A |
| 4176805 | A | G | 14 | G | G | G | G | G | G | G | G | G | G | G | G |
| 4178555 | C | T | 14 | T | T | T | T | T | T | T | T | T | T | T | T |
| 4183699 | G | A | 14 | A | A | A | A | A | A | A | A | A | A | A | A |
| 4195702 | C | T | 14 | T | T | T | T | T | T | T | T | T | T | T | T |
| 4199010 | G | A | 1  | . | A | . | . | . | . | . | . | . | . | . | . |
| 4199457 | C | T | 14 | T | T | T | T | T | T | T | T | T | T | T | T |
| 4206193 | C | T | 14 | T | T | T | T | T | T | T | T | T | T | T | T |
| 4210078 | G | T | 14 | T | T | T | T | T | T | T | T | T | T | T | T |
| 4214828 | C | G | 14 | G | G | G | G | G | G | G | G | G | G | G | G |
| 4218015 | A | G | 14 | G | G | G | G | G | G | G | G | G | G | G | G |
| 4230761 | T | C | 14 | C | C | C | C | C | C | C | C | C | C | C | C |
| 4233624 | A | C | 14 | C | C | C | C | C | C | C | C | C | C | C | C |
| 4237937 | T | C | 1  | . | . | . | . | . | . | . | . | . | . | . | C |
| 4240019 | C | T | 14 | T | T | T | T | T | T | T | T | T | T | T | T |
| 4241581 | A | G | 14 | G | G | G | G | G | G | G | G | G | G | G | G |
| 4242040 | A | G | 1  | . | . | . | . | . | . | . | G | . | . | . | . |
| 4245785 | A | T | 14 | T | T | T | T | T | T | T | T | T | T | T | T |
| 4266769 | T | G | 14 | G | G | G | G | G | G | G | G | G | G | G | G |
| 4266883 | G | T | 14 | T | T | T | T | T | T | T | T | T | T | T | T |
| 4272335 | C | T | 1  | . | . | . | . | T | . | . | . | . | . | . | . |
| 4296321 | C | T | 1  | N | N | N | N | N | N | N | N | N | N | N | T |
| 4307247 | C | T | 13 | T | T | T | T | T | N | T | T | T | T | T | T |
| 4309257 | C | T | 14 | T | T | T | T | T | T | T | T | T | T | T | T |
| 4313106 | G | A | 14 | A | A | A | A | A | A | A | A | A | A | A | A |
| 4317124 | A | C | 14 | C | C | C | C | C | C | C | C | C | C | C | C |
| 4317159 | T | C | 14 | C | C | C | C | C | C | C | C | C | C | C | C |
| 4317642 | G | A | 14 | A | A | A | A | A | A | A | A | A | A | A | A |
| 4318623 | C | T | 2  | T | . | . | . | . | . | . | . | . | T | . | . |



Table S3: Sequences insertion in 14 BCG strains compared to *M. bovis*.

| Start   | Length (bp) | BCG strains affected                                    |
|---------|-------------|---------------------------------------------------------|
| 402643  | 202         | Russia                                                  |
| 474929  | 129         | Glaxo                                                   |
| 474933  | 200         | connaught                                               |
| 476919  | 150         | Glaxo                                                   |
| 853780  | 1360        | Moreau, Russia                                          |
| 965530  | 122         | Birkhaug, Copenhagen, Glaxo, Frappier, Russia           |
| 965530  | 242         | China, Tice                                             |
| 965531  | 122         | Phipps                                                  |
| 1278507 | 86          | Moreau                                                  |
| 1278508 | 162         | Copenhagen                                              |
| 1306868 | 64          | all                                                     |
| 1341811 | 74          | Sweden                                                  |
| 1640995 | 55          | Chia, Phipps, Russia, Tice                              |
| 1754246 | 808         | all (except Sweden)                                     |
| 1982058 | 251         | Birkahug                                                |
| 2018699 | 157         | Tokyo                                                   |
| 2320081 | 211         | Phipps                                                  |
| 2322501 | 138         | Birkahug                                                |
| 2655206 | 110         | Tokyo                                                   |
| 2833553 | 44          | Birkahug, Connaught, Copenhagen, Glaxo                  |
| 2834209 | 44          | Frappier, Moreau                                        |
| 3076145 | 40          | Birkahug, Connaught, Copenhagen, Moreau, Phipps, Russia |
| 3079145 | 377         | all (except Russia)                                     |
| 3088862 | 202         | Sweden                                                  |
| 3089947 | 81          | Sweden                                                  |
| 3089960 | 69          | Pasteur                                                 |
| 3092359 | 52          | Pasteur                                                 |
| 3112453 | 110         | Russia                                                  |
| 3196289 | 861         | Tokyo                                                   |
| 3247973 | 59          | Russia                                                  |
| 3293191 | 61          | Russia                                                  |
| 3293275 | 120         | China                                                   |
| 3293275 | 61          | Phipps, Tice                                            |
| 3379796 | 70          | all                                                     |
| 3545445 | 94          | Phipps                                                  |
| 3561165 | 165         | Sweden                                                  |
| 3706540 | 345         | Birkahug                                                |
| 4092808 | 173         | Sweden                                                  |
| 4092808 | 116         | Tokyo                                                   |
| 4306967 | 1949        | Moreau                                                  |
| 4307385 | 2407        | all (except Moreau)                                     |





Table S5: The lengths and positions of *leuA* gene insertions in *M. bovis* and BCG strains.

| <b>Strain</b>   | <b>Length of insertion in <i>leuA</i> (bp)</b> |
|-----------------|------------------------------------------------|
| <i>M. bovis</i> | 202                                            |
| Birkhaug        | 915                                            |
| China           | 1560                                           |
| Connaught       | 118                                            |
| Mexico          | 693                                            |
| Tice            | 1998                                           |
| Russia          | 1517                                           |
| Danish          | 118                                            |
| Frappier        | Same as H37Rv                                  |
| Glaxo           | 118                                            |
| Moreau          | 180                                            |
| Phipps          | 2009                                           |
| Prague          | 1067                                           |
| Sweden          | 372                                            |
| Japan           | 636                                            |
| Pasteur         | 693                                            |

Table S6: Pearson correlation coefficient between biological replicates of RNA-seq transcriptome data.

| V1           | Mbovis_1 | Mbovis_2 | Mbovis_3 | Glaxo_2 | Glaxo_3 | Russia_1 | Russia_2 | Sweden_1 | Sweden_2 | Sweden_3 | Moreau_2 | Moreau_3 | China_1 | China_2 | China_3 | Pasteur_2 | Pasteur_3 | Tokyo_1 | Tokyo_2 | Tokyo_3 | Tice_1 | Tice_2 | Copenhagen_1 | Copenhagen_2 | Copenhagen_3 | Phipps_1 | Phipps_2 | Phipps_3 | Connaught_2 | Connaught_3 | Prague_1 | Prague_3 | Birkhaug_1 | Birkhaug_2 | Birkhaug_3 | Frappier_1 | Frappier_2 | Frappier_3 |
|--------------|----------|----------|----------|---------|---------|----------|----------|----------|----------|----------|----------|----------|---------|---------|---------|-----------|-----------|---------|---------|---------|--------|--------|--------------|--------------|--------------|----------|----------|----------|-------------|-------------|----------|----------|------------|------------|------------|------------|------------|------------|
| Mbovis_1     | 1.00     | 0.97     | 0.99     | 0.62    | 0.60    | 0.66     | 0.64     | 0.68     | 0.69     | 0.70     | 0.63     | 0.63     | 0.47    | 0.47    | 0.47    | 0.55      | 0.55      | 0.67    | 0.68    | 0.68    | 0.62   | 0.63   | 0.68         | 0.62         | 0.63         | 0.49     | 0.49     | 0.49     | 0.59        | 0.58        | 0.58     | 0.61     | 0.69       | 0.68       | 0.67       | 0.60       | 0.58       | 0.61       |
| Mbovis_2     | 0.97     | 1.00     | 0.98     | 0.60    | 0.58    | 0.63     | 0.61     | 0.67     | 0.67     | 0.68     | 0.67     | 0.66     | 0.50    | 0.51    | 0.50    | 0.55      | 0.55      | 0.68    | 0.68    | 0.69    | 0.62   | 0.62   | 0.66         | 0.60         | 0.61         | 0.52     | 0.52     | 0.52     | 0.62        | 0.62        | 0.54     | 0.58     | 0.69       | 0.69       | 0.68       | 0.62       | 0.62       | 0.63       |
| Mbovis_3     | 0.99     | 0.98     | 1.00     | 0.62    | 0.60    | 0.66     | 0.64     | 0.67     | 0.68     | 0.69     | 0.63     | 0.63     | 0.46    | 0.46    | 0.46    | 0.53      | 0.53      | 0.67    | 0.67    | 0.68    | 0.61   | 0.62   | 0.67         | 0.62         | 0.62         | 0.47     | 0.47     | 0.47     | 0.59        | 0.58        | 0.58     | 0.60     | 0.68       | 0.68       | 0.67       | 0.60       | 0.58       | 0.62       |
| Glaxo_2      | 0.62     | 0.60     | 0.62     | 1.00    | 0.99    | 0.91     | 0.91     | 0.90     | 0.90     | 0.90     | 0.82     | 0.82     | 0.66    | 0.66    | 0.66    | 0.70      | 0.71      | 0.89    | 0.90    | 0.89    | 0.94   | 0.95   | 0.97         | 0.98         | 0.98         | 0.71     | 0.72     | 0.72     | 0.89        | 0.88        | 0.97     | 0.97     | 0.89       | 0.89       | 0.89       | 0.90       | 0.86       | 0.92       |
| Glaxo_3      | 0.60     | 0.58     | 0.60     | 0.99    | 1.00    | 0.90     | 0.90     | 0.88     | 0.89     | 0.88     | 0.78     | 0.78     | 0.64    | 0.64    | 0.64    | 0.68      | 0.70      | 0.87    | 0.88    | 0.87    | 0.93   | 0.94   | 0.97         | 0.98         | 0.98         | 0.69     | 0.70     | 0.70     | 0.87        | 0.86        | 0.98     | 0.97     | 0.87       | 0.87       | 0.86       | 0.88       | 0.83       | 0.91       |
| Russia_1     | 0.66     | 0.63     | 0.66     | 0.91    | 0.90    | 1.00     | 0.99     | 0.95     | 0.97     | 0.96     | 0.84     | 0.84     | 0.57    | 0.57    | 0.57    | 0.62      | 0.64      | 0.95    | 0.95    | 0.94    | 0.86   | 0.86   | 0.89         | 0.90         | 0.89         | 0.63     | 0.63     | 0.63     | 0.79        | 0.78        | 0.90     | 0.89     | 0.94       | 0.93       | 0.93       | 0.81       | 0.75       | 0.83       |
| Russia_2     | 0.64     | 0.61     | 0.64     | 0.91    | 0.90    | 0.99     | 1.00     | 0.94     | 0.96     | 0.94     | 0.82     | 0.81     | 0.54    | 0.54    | 0.54    | 0.59      | 0.61      | 0.93    | 0.94    | 0.92    | 0.84   | 0.85   | 0.88         | 0.89         | 0.88         | 0.60     | 0.60     | 0.60     | 0.77        | 0.75        | 0.90     | 0.89     | 0.92       | 0.92       | 0.91       | 0.78       | 0.72       | 0.81       |
| Sweden_1     | 0.68     | 0.67     | 0.67     | 0.90    | 0.88    | 0.95     | 0.94     | 1.00     | 0.99     | 0.99     | 0.91     | 0.90     | 0.70    | 0.70    | 0.70    | 0.74      | 0.75      | 0.97    | 0.97    | 0.96    | 0.90   | 0.89   | 0.90         | 0.89         | 0.89         | 0.74     | 0.74     | 0.74     | 0.86        | 0.85        | 0.86     | 0.89     | 0.98       | 0.98       | 0.97       | 0.85       | 0.81       | 0.85       |
| Sweden_2     | 0.69     | 0.67     | 0.68     | 0.90    | 0.89    | 0.97     | 0.96     | 0.99     | 1.00     | 0.99     | 0.89     | 0.89     | 0.66    | 0.66    | 0.66    | 0.71      | 0.72      | 0.96    | 0.97    | 0.96    | 0.89   | 0.89   | 0.90         | 0.90         | 0.89         | 0.71     | 0.71     | 0.71     | 0.84        | 0.83        | 0.88     | 0.90     | 0.97       | 0.97       | 0.97       | 0.84       | 0.79       | 0.84       |
| Sweden_3     | 0.70     | 0.68     | 0.69     | 0.90    | 0.88    | 0.96     | 0.94     | 0.99     | 0.99     | 1.00     | 0.90     | 0.90     | 0.69    | 0.69    | 0.69    | 0.73      | 0.74      | 0.97    | 0.97    | 0.96    | 0.90   | 0.89   | 0.90         | 0.90         | 0.89         | 0.73     | 0.73     | 0.73     | 0.85        | 0.84        | 0.87     | 0.90     | 0.98       | 0.98       | 0.97       | 0.85       | 0.81       | 0.85       |
| Moreau_2     | 0.63     | 0.67     | 0.63     | 0.82    | 0.78    | 0.84     | 0.82     | 0.91     | 0.89     | 0.90     | 1.00     | 1.00     | 0.77    | 0.78    | 0.77    | 0.75      | 0.75      | 0.93    | 0.92    | 0.94    | 0.87   | 0.85   | 0.82         | 0.81         | 0.81         | 0.80     | 0.80     | 0.80     | 0.88        | 0.88        | 0.75     | 0.79     | 0.93       | 0.93       | 0.93       | 0.88       | 0.88       | 0.86       |
| Moreau_3     | 0.63     | 0.66     | 0.63     | 0.82    | 0.78    | 0.84     | 0.81     | 0.90     | 0.89     | 0.90     | 1.00     | 1.00     | 0.77    | 0.77    | 0.77    | 0.75      | 0.75      | 0.93    | 0.92    | 0.93    | 0.87   | 0.85   | 0.82         | 0.81         | 0.81         | 0.80     | 0.80     | 0.80     | 0.88        | 0.88        | 0.75     | 0.79     | 0.92       | 0.93       | 0.93       | 0.87       | 0.88       | 0.86       |
| China_1      | 0.47     | 0.50     | 0.46     | 0.66    | 0.64    | 0.57     | 0.54     | 0.70     | 0.66     | 0.69     | 0.77     | 0.77     | 1.00    | 1.00    | 1.00    | 0.91      | 0.91      | 0.69    | 0.68    | 0.70    | 0.80   | 0.77   | 0.71         | 0.68         | 0.69         | 0.94     | 0.94     | 0.94     | 0.82        | 0.83        | 0.61     | 0.68     | 0.72       | 0.73       | 0.73       | 0.80       | 0.82       | 0.76       |
| China_2      | 0.47     | 0.51     | 0.46     | 0.66    | 0.64    | 0.57     | 0.54     | 0.70     | 0.66     | 0.69     | 0.78     | 0.77     | 1.00    | 1.00    | 1.00    | 0.91      | 0.91      | 0.70    | 0.69    | 0.70    | 0.80   | 0.77   | 0.71         | 0.68         | 0.69         | 0.94     | 0.94     | 0.94     | 0.82        | 0.83        | 0.61     | 0.68     | 0.72       | 0.74       | 0.73       | 0.80       | 0.82       | 0.76       |
| China_3      | 0.47     | 0.50     | 0.46     | 0.66    | 0.64    | 0.57     | 0.54     | 0.70     | 0.66     | 0.69     | 0.77     | 0.77     | 1.00    | 1.00    | 1.00    | 0.91      | 0.91      | 0.70    | 0.68    | 0.70    | 0.80   | 0.77   | 0.71         | 0.68         | 0.69         | 0.94     | 0.94     | 0.94     | 0.82        | 0.83        | 0.61     | 0.68     | 0.72       | 0.73       | 0.73       | 0.80       | 0.82       | 0.76       |
| Pasteur_2    | 0.55     | 0.55     | 0.53     | 0.70    | 0.68    | 0.62     | 0.59     | 0.74     | 0.71     | 0.73     | 0.75     | 0.75     | 0.91    | 0.91    | 0.91    | 1.00      | 0.98      | 0.71    | 0.71    | 0.71    | 0.80   | 0.79   | 0.75         | 0.71         | 0.72         | 0.86     | 0.86     | 0.86     | 0.80        | 0.80        | 0.67     | 0.73     | 0.75       | 0.75       | 0.75       | 0.78       | 0.78       | 0.75       |
| Pasteur_3    | 0.55     | 0.55     | 0.53     | 0.71    | 0.70    | 0.64     | 0.61     | 0.75     | 0.72     | 0.74     | 0.75     | 0.75     | 0.91    | 0.91    | 0.91    | 0.98      | 1.00      | 0.72    | 0.72    | 0.72    | 0.82   | 0.80   | 0.76         | 0.73         | 0.74         | 0.87     | 0.87     | 0.87     | 0.81        | 0.81        | 0.69     | 0.74     | 0.76       | 0.77       | 0.76       | 0.79       | 0.79       | 0.77       |
| Tokyo_1      | 0.67     | 0.68     | 0.67     | 0.89    | 0.87    | 0.95     | 0.93     | 0.97     | 0.96     | 0.97     | 0.93     | 0.93     | 0.69    | 0.70    | 0.70    | 0.71      | 0.72      | 1.00    | 1.00    | 1.00    | 0.89   | 0.88   | 0.89         | 0.89         | 0.89         | 0.74     | 0.74     | 0.74     | 0.87        | 0.87        | 0.85     | 0.87     | 0.98       | 0.98       | 0.98       | 0.87       | 0.85       | 0.88       |
| Tokyo_2      | 0.68     | 0.68     | 0.67     | 0.90    | 0.88    | 0.95     | 0.94     | 0.97     | 0.97     | 0.97     | 0.92     | 0.92     | 0.68    | 0.69    | 0.68    | 0.71      | 0.72      | 1.00    | 1.00    | 0.99    | 0.89   | 0.89   | 0.89         | 0.90         | 0.89         | 0.73     | 0.73     | 0.73     | 0.87        | 0.86        | 0.86     | 0.88     | 0.98       | 0.98       | 0.98       | 0.87       | 0.84       | 0.87       |
| Tokyo_3      | 0.68     | 0.69     | 0.68     | 0.89    | 0.87    | 0.94     | 0.92     | 0.96     | 0.96     | 0.96     | 0.94     | 0.93     | 0.70    | 0.70    | 0.70    | 0.71      | 0.72      | 1.00    | 0.99    | 1.00    | 0.89   | 0.88   | 0.89         | 0.89         | 0.88         | 0.74     | 0.74     | 0.74     | 0.88        | 0.87        | 0.84     | 0.87     | 0.98       | 0.98       | 0.98       | 0.88       | 0.86       | 0.88       |
| Tice_1       | 0.62     | 0.62     | 0.61     | 0.94    | 0.93    | 0.86     | 0.84     | 0.90     | 0.89     | 0.90     | 0.87     | 0.87     | 0.80    | 0.80    | 0.80    | 0.80      | 0.82      | 0.89    | 0.89    | 0.89    | 1.00   | 0.99   | 0.96         | 0.95         | 0.96         | 0.84     | 0.85     | 0.85     | 0.94        | 0.94        | 0.92     | 0.95     | 0.90       | 0.90       | 0.89       | 0.94       | 0.91       | 0.94       |
| Tice_2       | 0.63     | 0.62     | 0.62     | 0.95    | 0.94    | 0.86     | 0.85     | 0.89     | 0.89     | 0.89     | 0.85     | 0.85     | 0.77    | 0.77    | 0.77    | 0.79      | 0.80      | 0.88    | 0.89    | 0.88    | 0.99   | 1.00   | 0.96         | 0.96         | 0.96         | 0.82     | 0.82     | 0.82     | 0.93        | 0.93        | 0.94     | 0.96     | 0.89       | 0.89       | 0.88       | 0.93       | 0.90       | 0.94       |
| Copenhagen_1 | 0.68     | 0.66     | 0.67     | 0.97    | 0.97    | 0.89     | 0.88     | 0.90     | 0.90     | 0.90     | 0.82     | 0.82     | 0.71    | 0.71    | 0.71    | 0.75      | 0.76      | 0.89    | 0.89    | 0.89    | 0.96   | 0.96   | 1.00         | 0.99         | 0.99         | 0.75     | 0.76     | 0.76     | 0.90        | 0.89        | 0.95     | 0.97     | 0.89       | 0.89       | 0.88       | 0.90       | 0.86       | 0.91       |
| Copenhagen_2 | 0.62     | 0.60     | 0.62     | 0.98    | 0.98    | 0.90     | 0.89     | 0.89     | 0.90     | 0.90     | 0.81     | 0.81     | 0.68    | 0.68    | 0.68    | 0.71      | 0.73      | 0.89    | 0.90    | 0.89    | 0.95   | 0.96   | 0.99         | 1.00         | 1.00         | 0.73     | 0.73     | 0.73     | 0.89        | 0.88        | 0.97     | 0.98     | 0.89       | 0.88       | 0.88       | 0.89       | 0.85       | 0.91       |
| Copenhagen_3 | 0.63     | 0.61     | 0.62     | 0.98    | 0.98    | 0.89     | 0.88     | 0.89     | 0.89     | 0.89     | 0.81     | 0.81     | 0.69    | 0.69    | 0.69    | 0.72      | 0.74      | 0.89    | 0.89    | 0.88    | 0.96   | 0.96   | 0.99         | 1.00         | 1.00         | 0.74     | 0.75     | 0.75     | 0.90        | 0.89        | 0.97     | 0.97     | 0.88       | 0.88       | 0.88       | 0.90       | 0.86       | 0.92       |
| Phipps_1     | 0.49     | 0.52     | 0.47     | 0.71    | 0.69    | 0.63     | 0.60     | 0.74     | 0.71     | 0.73     | 0.80     | 0.80     | 0.94    | 0.94    | 0.94    | 0.86      | 0.87      | 0.74    | 0.73    | 0.74    | 0.84   | 0.82   | 0.75         | 0.73         | 0.74         | 1.00     | 1.00     | 1.00     | 0.86        | 0.86        | 0.67     | 0.73     | 0.76       | 0.77       | 0.77       | 0.83       | 0.85       | 0.80       |
| Phipps_2     | 0.49     | 0.52     | 0.47     | 0.72    | 0.70    | 0.63     | 0.60     | 0.74     | 0.71     | 0.73     | 0.80     | 0.80     | 0.94    | 0.94    | 0.94    | 0.86      | 0.87      | 0.74    | 0.73    | 0.74    | 0.85   | 0.82   | 0.76         | 0.73         | 0.75         | 1.00     | 1.00     | 1.00     | 0.86        | 0.87        | 0.68     | 0.74     | 0.76       | 0.77       | 0.77       | 0.84       | 0.85       | 0.80       |
| Phipps_3     | 0.49     | 0.52     | 0.47     | 0.72    | 0.70    | 0.63     | 0.60     | 0.74     | 0.71     | 0.73     | 0.80     | 0.80     | 0.94    | 0.94    | 0.94    | 0.86      | 0.87      | 0.74    | 0.73    | 0.74    | 0.85   | 0.82   | 0.76         | 0.73         | 0.75         | 1.00     | 1.00     | 1.00     | 0.86        | 0.87        | 0.68     | 0.74     | 0.76       | 0.77       | 0.77       | 0.83       | 0.85       | 0.80       |
| Connaught_2  | 0.59     | 0.62     | 0.59     | 0.89    | 0.87    | 0.79     | 0.77     | 0.86     | 0.84     | 0.85     | 0.88     | 0.88     | 0.82    | 0.82    | 0.82    | 0.80      | 0.81      | 0.87    | 0.87    | 0.88    | 0.94   | 0.93   | 0.90         | 0.89         | 0.90         | 0.86     | 0.86     | 0.86     | 1.00        | 1.00        | 0.85     | 0.88     | 0.88       | 0.88       | 0.89       | 0.98       | 0.97       | 0.97       |
| Connaught_3  | 0.58     | 0.62     | 0.58     | 0.88    | 0.86    | 0.78     | 0.75     | 0.85     | 0.83     | 0.84     | 0.88     | 0.88     | 0.83    | 0.83    | 0.83    | 0.80      | 0.81      | 0.87    | 0.86    | 0.87    | 0.94   | 0.93   | 0.89         | 0.88         | 0.89         | 0.86     | 0.87     | 0.87     | 1.00        | 1.00        | 0.83     | 0.87     | 0.87       | 0.87       | 0.88       | 0.97       | 0.97       | 0.96       |

Table S7: Proteomic of BCG Japan, Birkahug, Pasteur, Phipps and Danish compared to *M. bovis*. List of all identified proteins.

| <b>Mb Number</b> | <b>GenBank ID</b> | <b>Molecular Weig</b> | <b><i>M.bovis</i></b> | <b>Pasteur</b> | <b>Phipps</b> | <b>Danish</b> | <b>Tokyo</b> | <b>Birkhaug</b> |
|------------------|-------------------|-----------------------|-----------------------|----------------|---------------|---------------|--------------|-----------------|
| Mb0448           | 31791618          | 57 kDa                | 1                     | 1.7            | 1.9           | 1.6           | 2.3          | 2.5             |
| Mb1423           | 31792582          | 21 kDa                | 0.9                   | 0.8            | 1             | 0.6           | 0.8          | 0.6             |
| Mb2268           | 31793424          | 13 kDa                | 1                     | 0.5            | 0.6           | 0.5           | 0.5          | 0.6             |
| Mb0485           | 31791655          | 22 kDa                | 1.1                   | 0.9            | 1             | 0.7           | 1.3          | 1.2             |
| Mb3452c          | 31794599          | 11 kDa                | 1                     | 2.2            | 3.2           | 1.6           | 2.3          | 3.7             |
| Mb0754           | 31791919          | 20 kDa                | 0.8                   | 2.5            | 2.2           | 2             | 1.9          | 2.7             |
| Mb0358           | 31791528          | 67 kDa                | 1                     | 0.8            | 1.7           | 1.1           | 1.3          | 1.9             |
| Mb0359           | 31791529          | 25 kDa                | 1                     | 1.1            | 2.1           | 1.3           | 1.7          | 2.3             |
| Mb2169c          | 31793325          | 28 kDa                | 0.9                   | 0.6            | 0.8           | 0.9           | 1.1          | 0.6             |
| Mb2489c          | 31793643          | 51 kDa                | 1.1                   | 1.2            | 1.6           | 1.2           | 1.3          | 1.6             |
| Mb1243           | 31792404          | 8 kDa                 | 1.1                   | 0.5            | 0.6           | 0.4           | 1.5          | 1.3             |
| Mb3945           | 31795087          | 13 kDa                | 1                     | 0.4            | 0.4           | 0.4           | 0.5          | 0.7             |
| Mb3672c          | 31794818          | 7 kDa                 | 1                     | 2              | 0.8           | 0.6           | 1.1          | 1.7             |
| Mb2965c          | 31794117          | 224 kDa               | 1                     | 2.2            | 1.3           | 1.1           | 1.6          | 1.9             |
| Mb0671           | 31791836          | 13 kDa                | 1                     | 1.2            | 1.1           | 0.9           | 0.9          | 1.6             |
| Mb0471           | 31791641          | 49 kDa                | 1                     | 1.8            | 1.6           | 1.5           | 1.6          | 1.7             |
| Mb3010c          | 31794162          | 22 kDa                | 1                     | 0.7            | 1.5           | 0.6           | 1.6          | 1.7             |
| Mb1858           | 31793017          | 17 kDa                | 1.2                   | 1.9            | 0.8           | 0.9           | 1.7          | 1.6             |
| Mb3743c          | 31794888          | 13 kDa                | 1                     | 0.8            | 1.1           | 0.7           | 1            | 0.7             |
| Mb2765c          | 31793918          | 29 kDa                | 1                     | 0.9            | 1             | 0.9           | 0.9          | 0.9             |
| Mb0837c          | 31792002          | 10 kDa                | 1                     | 0.5            | 0.6           | 0.3           | 0.4          | 0.2             |
| Mb3628c          | 31794774          | 12 kDa                | 0.9                   | 0.3            | 1             | 0.7           | 0.6          | 0.7             |
| Mb1109c          | 31792271          | 18 kDa                | 1.1                   | 1.3            | 1.5           | 2.2           | 1.1          | 2.5             |
| Mb3485c          | 31794632          | 19 kDa                | 1                     | 2.7            | 1.8           | 1.5           | 2            | 2.9             |
| Mb2227c          | 31793383          | 13 kDa                | 1                     | 1              | 1.3           | 0.7           | 1.5          | 1.2             |
| Mb3910c          | 31795054          | 12 kDa                | 1                     | 2.5            | 2             | 2.1           | 2.7          | 2.3             |
| Mb2244           | 31793400          | 54 kDa                | 1                     | 0.7            | 0.9           | 0.7           | 0.7          | 0.8             |
| Mb2135c          | 31793291          | 7 kDa                 | 1.2                   | 1              | 1.6           | 0.7           | 1.7          | 1.2             |
| Mb3451c          | 31794598          | 56 kDa                | 1                     | 1.8            | 1.9           | 1.2           | 2.3          | 2.9             |
| Mb3817           | 31794961          | 17 kDa                | 1                     | 0.6            | 0.8           | 0.8           | 1.1          | 1               |
| Mb0007           | 31791184          | 31 kDa                | 1                     | 1.7            | 1.9           | 1.8           | 1.6          | 2               |
| Mb1272           | 31792433          | 34 kDa                | 1                     | 2.2            | 1.2           | 1.1           | 2.5          | 1.9             |
| Mb2960           | 31794112          | 159 kDa               | 1                     | 1.1            | 1             | 1.1           | 1            | 1.7             |
| Mb0704           | 31791869          | 44 kDa                | 0.9                   | 2.1            | 2.2           | 1.9           | 2            | 2.6             |
| Mb0130           | 31791304          | 35 kDa                | 1                     | 1.3            | 2             | 1.1           | 1            | 1.2             |
| Mb0736           | 31791901          | 11 kDa                | 1                     | 0.7            | 1.3           | 0.8           | 1.3          | 1.4             |
| Mb0737           | 31791902          | 21 kDa                | 1                     | 2              | 1.5           | 1.7           | 1.2          | 1.5             |
| Mb3897           | 31795041          | 20 kDa                | 0.9                   | 0.9            | 0.9           | 0.8           | 0.7          | 0.6             |
| Mb1329           | 31792490          | 65 kDa                | 1                     | 1              | 0.8           | 0.7           | 0.9          | 1.1             |



|         |               |         |     |     |     |     |     |     |
|---------|---------------|---------|-----|-----|-----|-----|-----|-----|
| Mb1656  | 31792816      | 53 kDa  | 1   | 1.7 | 1.6 | 2.5 | 1.9 | 2.1 |
| Mb1868c | 31793027      | 80 kDa  | 1   | 1.7 | 1.8 | 1.1 | 1.2 | 1.6 |
| Mb2750  | 31793903      | 50 kDa  | 1   | 0.6 | 0.9 | 0.9 | 1.1 | 1   |
| Mb0744  | 31791909      | 16 kDa  | 1   | 3.1 | 1.6 | 0.9 | 2.5 | 2.9 |
| Mb2718c | 31793871      | 11 kDa  | 1.1 | 1   | 0.9 | 0.6 | 1.9 | 1.5 |
| Mb0020c | 31791197      | 56 kDa  | 1   | 0.6 | 1.1 | 1.5 | 0.8 | 1.1 |
| Mb0386  | 31791556      | 8 kDa   | 0.9 | 0.2 | 0.4 | 0.3 | 0.3 | 0.4 |
| Mb3486c | 31794633      | 38 kDa  | 1   | 1.4 | 2   | 1.9 | 1.6 | 2.3 |
| Mb1950  | 31793108      | 85 kDa  | 1   | 0.9 | 0.9 | 1   | 1.2 | 1   |
| Mb3652  | 31794798      | 18 kDa  | 1   | 2.1 | 2.1 | 2.7 | 4.7 | 2.2 |
| Mb0477  | 31791647      | 31 kDa  | 1   | 1.1 | 1.3 | 1.9 | 1.7 | 1.8 |
| Mb2503c | 31793657      | 177 kDa | 1   | 0.9 | 0.9 | 0.8 | 0.9 | 0.9 |
| Mb0009  | 31791186      | 19 kDa  | 1.1 | 0.6 | 1   | 0.8 | 1.3 | 1.4 |
| Mb1662  | 31792822      | 15 kDa  | 1.2 | 0.6 | 0.6 | 0.6 | 1.5 | 1.8 |
| Mb2898  | 31794050      | 22 kDa  | 1   | 0.2 | 0.3 | 0.3 | 0.3 | 0.4 |
| Mb1255  | 31792416      | 54 kDa  | 1   | 1.5 | 0.8 | 0.7 | 1   | 1.3 |
| Mb3055c | 31794207      | 28 kDa  | 1   | 1.1 | 1.1 | 1.7 | 0.7 | 1.1 |
| Mb1665c | 31792825      | 10 kDa  | 0.9 | 0.3 | 0.7 | 0.4 | 0.5 | 0.4 |
| Mb2933c | 31794085      | 17 kDa  | 1   | 1.6 | 1.9 | 1.8 | 1.6 | 1.8 |
| Mb0368  | 31791538      | 30 kDa  | 1.1 | 0.3 | 0.4 | 0.5 | 0.5 | 0.7 |
| Mb3831c | 31794975      | 69 kDa  | 1   | 0.7 | 0.8 | 0.9 | 0.8 | 0.9 |
| Mb2324  | 31793480      | 9 kDa   | 1   | 0.2 | 0.3 | 0.2 | 0.3 | 0.3 |
| Mb0254c | 31791426      | 71 kDa  | 1   | 1.7 | 1.3 | 0.8 | 1   | 1.1 |
| Mb2906c | 31794058      | 21 kDa  | 1.1 | 0.3 | 0.3 | 0.3 | 0.3 | 0.3 |
| Mb3809  | 31794953      | 20 kDa  | 1   | 1.1 | 1.3 | 1.1 | 0.9 | 1.1 |
| Mb2238  | 31793394      | 57 kDa  | 1   | 1.3 | 1.6 | 1.1 | 1.8 | 1.7 |
| Mb2808c | 31793961      | 10 kDa  | 1   | 2.1 | 1.6 | 1.6 | 1.5 | 1.7 |
| Mb3627c | 31794773      | 94 kDa  | 0.9 | 1.2 | 1.2 | 1.2 | 0.7 | 0.7 |
| Mb0360  | 31791530      | 41 kDa  | 1   | 2.1 | 1.8 | 1.2 | 1.9 | 2.3 |
| Mb3054c | 31794206      | 32 kDa  | 1.1 | 1.3 | 1.1 | 1.3 | 1.7 | 1.4 |
| Mb1427  | 31792586      | 43 kDa  | 1   | 0.8 | 0.6 | 0.7 | 0.8 | 0.8 |
| Mb1907  | 31793066      | 18 kDa  | 1   | 0.5 | 0.4 | 0.5 | 0.5 | 0.4 |
| Mb0729  | 31791894      | 9 kDa   | 1   | 2.1 | 1.6 | 1.5 | 1.7 | 2   |
| Mb0321  | 31791492      | 14 kDa  | 0.9 | 0.7 | 0.9 | 1   | 0.6 | 0.6 |
| Mb0581c | 31791748      | 18 kDa  | 1   | 0.9 | 1.1 | 0.8 | 1.2 | 0.9 |
| Mb3133  | 31794285      | 49 kDa  | 1   | 0.8 | 0.8 | 0.8 | 0.9 | 1   |
| Mb3951c | 31795093      | 21 kDa  | 1   | 1.7 | 1.6 | 1.1 | 1.1 | 1.2 |
| Mb2952c | 31794104      | 27 kDa  | 1   | 1   | 1.2 | 1.5 | 1.5 | 1.2 |
| Mb2494  | 31793648      | 94 kDa  | 1   | 0.9 | 1.2 | 1.1 | 1.1 | 0.9 |
| Mb1067c | 31792230 (+2) | 11 kDa  | 0.9 | 0.9 | 0.9 | 0.9 | 0.7 | 0.8 |
| Mb0391c | 31791561      | 93 kDa  | 1   | 1   | 1.1 | 1.6 | 1   | 1   |
| Mb1280c | 161511534     | 136 kDa | 1   | 0.9 | 0.7 | 0.8 | 1   | 0.9 |

|         |          |         |     |     |      |     |     |     |
|---------|----------|---------|-----|-----|------|-----|-----|-----|
| Mb1926  | 31793085 | 7 kDa   | 1   | 0.4 | 0.5  | 0.4 | 0.6 | 0.8 |
| Mb0811  | 31791976 | 9 kDa   | 1   | 0.8 | 1.1  | 0.8 | 0.8 | 0.9 |
| Mb2971c | 31794123 | 218 kDa | 1   | 1.2 | 1    | 1.2 | 1.4 | 1   |
| Mb1051  | 31792214 | 45 kDa  | 1   | 2   | 1.5  | 1.6 | 2.1 | 1.9 |
| Mb3250c | 31794402 | 24 kDa  | 1   | 2.6 | 2.3  | 1.6 | 1.7 | 1.9 |
| Mb1584  | 31792743 | 16 kDa  | 1   | 1.1 | 0.9  | 0.7 | 1   | 0.8 |
| Mb1484c | 31792643 | 76 kDa  | 1   | 0.8 | 0.8  | 0.9 | 0.9 | 0.9 |
| Mb1857  | 31793016 | 14 kDa  | 1   | 0.5 | 0.6  | 0.6 | 0.5 | 0.5 |
| Mb1342  | 31792503 | 53 kDa  | 1   | 0.9 | 0.7  | 1.1 | 0.7 | 0.7 |
| Mb0670  | 31791835 | 18 kDa  | 1   | 1.4 | 1.1  | 1.4 | 1.2 | 1.8 |
| Mb2254c | 31793410 | 27 kDa  | 1   | 1.3 | 1.8  | 0.8 | 1.2 | 1.2 |
| Mb1670  | 31792830 | 15 kDa  | 1   | 1.2 | 1.1  | 1.3 | 1.1 | 1.2 |
| Mb1515  | 31792674 | 41 kDa  | 1.1 | 1.4 | 1.2  | 1.2 | 1.8 | 1.4 |
| Mb2914c | 31794066 | 31 kDa  | 1   | 1.5 | 1.7  | 1.6 | 1.8 | 1.7 |
| Mb3882  | 31795026 | 14 kDa  | 1   | 1.1 | 1.4  | 1.3 | 1.1 | 1   |
| Mb2121c | 31793277 | 9 kDa   | 0.9 | 1   | 1.1  | 1   | 0.7 | 0.7 |
| Mb2057c | 31793214 | 16 kDa  | 1   | 0.5 | 15.7 | 0.9 | 2.2 | 1.7 |
| Mb3492  | 31794639 | 31 kDa  | 1   | 0.8 | 0.5  | 0.6 | 0.8 | 1.6 |
| Mb2435  | 31793591 | 9 kDa   | 1   | 0.8 | 0.6  | 0.6 | 1.5 | 1.1 |
| Mb3702c | 31794848 | 15 kDa  | 0.9 | 0.9 | 0.9  | 0.5 | 0.3 | 0.6 |
| Mb0730  | 31791895 | 15 kDa  | 1   | 3.4 | 2.4  | 2.3 | 2.8 | 3.2 |
| Mb1338  | 31792499 | 18 kDa  | 1   | 2.1 | 1.7  | 1.6 | 2.5 | 2.3 |
| Mb1123  | 31792286 | 45 kDa  | 1   | 1.4 | 1.3  | 1.8 | 1.2 | 1.2 |
| Mb1363  | 31792524 | 96 kDa  | 1   | 0.9 | 0.9  | 0.8 | 0.9 | 0.8 |
| Mb3871  | 31795015 | 20 kDa  | 1   | 1.1 | 0.5  | 0.5 | 0.4 | 0.4 |
| Mb0895  | 31792059 | 15 kDa  | 1   | 0.7 | 0.9  | 0.7 | 0.6 | 0.7 |
| Mb1652  | 31792812 | 23 kDa  | 1   | 1   | 1    | 1.1 | 1.2 | 1   |
| Mb1891  | 31793050 | 33 kDa  | 1   | 0.7 | 0.7  | 0.6 | 1.1 | 0.7 |
| Mb3889c | 31795033 | 166 kDa | 1   | 1.9 | 1.6  | 1.3 | 1.9 | 1.8 |
| Mb2521  | 31793673 | 8 kDa   | 1   | 0.7 | 1.3  | 0.8 | 1.1 | 1.2 |
| Mb2913c | 31794065 | 29 kDa  | 0.9 | 2.1 | 1.1  | 0.8 | 1.8 | 2.2 |
| Mb3614c | 31794760 | 18 kDa  | 1   | 1.3 | 1.6  | 1.3 | 1.1 | 1.1 |
| Mb1903c | 31793062 | 45 kDa  | 1   | 0.6 | 0.3  | 0.4 | 0.5 | 0.4 |
| Mb0742  | 31791907 | 23 kDa  | 1   | 3.2 | 1.6  | 1.8 | 2.5 | 2.9 |
| Mb3879  | 31795023 | 15 kDa  | 1   | 1   | 1    | 1.2 | 1.3 | 1   |
| Mb1471  | 31792630 | 36 kDa  | 1   | 1.7 | 1.3  | 1   | 0.6 | 0.7 |
| Mb2454  | 31793608 | 22 kDa  | 1   | 3.4 | 4.3  | 1.9 | 1.8 | 2.9 |
| Mb3487c | 31794634 | 23 kDa  | 1   | 2.6 | 2.2  | 1.9 | 2.1 | 2.9 |
| Mb0152  | 31791325 | 55 kDa  | 1   | 0.6 | 0.7  | 0.6 | 0.6 | 0.7 |
| Mb0256c | 31791428 | 11 kDa  | 1.2 | 0.4 | 0.9  | 0.6 | 1.7 | 2   |
| Mb0722  | 31791887 | 24 kDa  | 1   | 2.3 | 1.7  | 1.5 | 1.4 | 2.5 |
| Mb2320  | 31793476 | 35 kDa  | 1   | 1.1 | 0.8  | 1.4 | 0.9 | 0.9 |

|         |          |         |     |     |     |     |     |     |
|---------|----------|---------|-----|-----|-----|-----|-----|-----|
| Mb2468c | 31793622 | 9 kDa   | 1   | 1.2 | 1.3 | 0.6 | 0.5 | 0.6 |
| Mb2270  | 31793426 | 46 kDa  | 1   | 0.7 | 0.9 | 1.1 | 0.9 | 1.6 |
| Mb2618c | 31793771 | 60 kDa  | 1   | 1.1 | 0.9 | 1.1 | 0.9 | 0.9 |
| Mb2928c | 31794080 | 13 kDa  | 1   | 2.3 | 1.8 | 1.6 | 1.5 | 1.9 |
| Mb2504c | 31793658 | 62 kDa  | 1   | 1.2 | 1.1 | 1.4 | 1.1 | 1.2 |
| Mb0686  | 31791851 | 129 kDa | 1   | 1.2 | 1.3 | 1.7 | 2   | 2.5 |
| Mb2207c | 31793363 | 16 kDa  | 1   | 0.7 | 1   | 1.4 | 1.2 | 0.9 |
| Mb2471c | 31793625 | 103 kDa | 1   | 0.6 | 0.8 | 0.9 | 1.1 | 1.3 |
| Mb3276c | 31794428 | 54 kDa  | 1   | 2.3 | 2.1 | 2.2 | 2.5 | 2.7 |
| Mb3880  | 31795024 | 24 kDa  | 1   | 0.6 | 0.9 | 0.9 | 1   | 0.8 |
| Mb1210  | 31792371 | 12 kDa  | 1   | 1.1 | 2   | 0.6 | 0.9 | 1.2 |
| Mb0306  | 31791477 | 8 kDa   | 1   | 1   | 1.1 | 0.7 | 1.2 | 1   |
| Mb0055  | 31791231 | 17 kDa  | 1   | 1.8 | 1.6 | 1.6 | 1.5 | 1.9 |
| Mb2242  | 31793398 | 27 kDa  | 0.9 | 1.2 | 0.6 | 1.3 | 0.8 | 0.7 |
| Mb3303c | 31794455 | 18 kDa  | 1.1 | 1.2 | 0.8 | 1.1 | 1.4 | 1.3 |
| Mb0951  | 31792115 | 38 kDa  | 1   | 3.4 | 2.5 | 3   | 1.7 | 0.8 |
| Mb2171c | 31793327 | 28 kDa  | 0.9 | 2   | 1.1 | 1.9 | 0.7 | 0.7 |
| Mb3071  | 31794223 | 37 kDa  | 1   | 0.7 | 0.5 | 0.6 | 0.5 | 0.6 |
| Mb2563c | 31793716 | 20 kDa  | 1   | 0.5 | 1.2 | 1   | 1.5 | 1   |
| Mb2025  | 31793182 | 27 kDa  | 1   | 0.7 | 0.6 | 0.9 | 1.1 | 6.3 |
| Mb3159  | 31794311 | 38 kDa  | 0.9 | 2.6 | 2.1 | 1.6 | 0.6 | 0.7 |
| Mb0189  | 31791361 | 30 kDa  | 1   | 0.9 | 0.9 | 1   | 0.8 | 0.9 |
| Mb3440  | 31794587 | 33 kDa  | 1   | 0.4 | 0.9 | 0.9 | 12  | 0.5 |
| Mb0057  | 31791233 | 16 kDa  | 1   | 2.2 | 2.9 | 2.3 | 2.5 | 3.1 |
| Mb2864c | 31794016 | 94 kDa  | 1   | 1.6 | 1.3 | 1.5 | 1.2 | 1.8 |
| Mb2886c | 31794038 | 31 kDa  | 1   | 0.8 | 0.5 | 1.1 | 0.6 | 0.6 |
| Mb3392  | 31794540 | 10 kDa  | 1   | 0.9 | 1.1 | 0.6 | 1.1 | 1   |
| Mb1900c | 31793059 | 44 kDa  | 1   | 0.8 | 0.9 | 0.8 | 1   | 1   |
| Mb3700  | 31794846 | 25 kDa  | 1   | 0.5 | 0.5 | 0.5 | 0.5 | 0.7 |
| Mb2074c | 31793231 | 431 kDa | 1   | 1.6 | 1.3 | 1.6 | 1.6 | 2   |
| Mb0823  | 31791988 | 46 kDa  | 1.1 | 0.5 | 1.2 | 0.8 | 0.9 | 1.5 |
| Mb3577  | 31794723 | 17 kDa  | 1   | 1.1 | 0.8 | 0.9 | 1.1 | 0.8 |
| Mb2265  | 31793421 | 100 kDa | 1   | 0.8 | 0.8 | 0.9 | 0.8 | 0.6 |
| Mb3895  | 31795039 | 11 kDa  | 1.1 | 1   | 0.8 | 0.9 | 1.4 | 1.3 |
| Mb3330c | 31794482 | 63 kDa  | 1   | 2.1 | 1.4 | 1   | 1.6 | 1.8 |
| Mb0922c | 31792086 | 10 kDa  | 1   | 0.7 | 1.3 | 1   | 0.9 | 1.2 |
| Mb0658  | 31791823 | 25 kDa  | 1   | 1   | 1.1 | 1.1 | 1.3 | 1   |
| Mb1669  | 31792829 | 7 kDa   | 1   | 0.5 | 1.1 | 0.4 | 1.3 | 1.4 |
| Mb3219c | 31794371 | 7 kDa   | 0.9 | 0.5 | 0.6 | 0.5 | 0.3 | 0.4 |
| Mb3297  | 31794449 | 10 kDa  | 0.9 | 0.7 | 1.3 | 1.7 | 0.9 | 0.8 |
| Mb3331c | 31794483 | 49 kDa  | 1.1 | 3.5 | 2.6 | 1   | 3.3 | 3.7 |
| Mb1018c | 31792182 | 11 kDa  | 0.9 | 1.6 | 2.4 | 1.3 | 0.8 | 0.7 |

|         |           |         |     |     |     |     |     |     |
|---------|-----------|---------|-----|-----|-----|-----|-----|-----|
| Mb3069c | 31794221  | 64 kDa  | 1   | 1.1 | 1   | 1.2 | 0.9 | 0.9 |
| Mb2722  | 31793875  | 58 kDa  | 1   | 1.4 | 1.3 | 1.6 | 1.3 | 2.1 |
| Mb2774c | 31793927  | 31 kDa  | 1   | 1.8 | 1.8 | 1.5 | 0.7 | 1.3 |
| Mb3737  | 161511524 | 71 kDa  | 1   | 0.9 | 1.1 | 1.2 | 1   | 1.1 |
| Mb3693  | 31794839  | 19 kDa  | 1.1 | 2   | 1.1 | 1   | 1.8 | 1.5 |
| Mb0653  | 31791818  | 6 kDa   | 1   | 2.9 | 3.1 | 2.7 | 2.1 | 3.3 |
| Mb3251  | 31794403  | 30 kDa  | 1   | 1.9 | 0.9 | 0.9 | 0.8 | 0.8 |
| Mb0584  | 31791751  | 10 kDa  | 1.2 | 0.6 | 3.6 | 0.7 | 1.2 | 2.3 |
| Mb3670c | 31794816  | 102 kDa | 1   | 1.4 | 1.3 | 1.2 | 1.6 | 1.2 |
| Mb0659  | 31791824  | 15 kDa  | 1   | 1.4 | 2.5 | 1.7 | 1.5 | 2.1 |
| Mb0976  | 31792140  | 41 kDa  | 1   | 2.2 | 1.8 | 1.6 | 2.1 | 2.3 |
| Mb3308  | 31794460  | 59 kDa  | 1   | 0.9 | 0.9 | 1.1 | 0.9 | 0.7 |
| Mb1340  | 31792501  | 59 kDa  | 1   | 0.7 | 0.9 | 1.1 | 1.5 | 1.5 |
| Mb3177  | 31794329  | 23 kDa  | 1   | 1.7 | 1.7 | 1.9 | 1.6 | 1.8 |
| Mb3644c | 31794790  | 20 kDa  | 1   | 0.6 | 1.1 | 1.2 | 0.6 | 0.9 |
| Mb0794  | 31791959  | 16 kDa  | 1   | 2.2 | 1.9 | 1.6 | 0.6 | 1.3 |
| Mb0508  | 31791678  | 33 kDa  | 1   | 0.6 | 1.1 | 1.1 | 1.1 | 1   |
| Mb0720  | 31791885  | 11 kDa  | 1   | 3.2 | 1.7 | 2.4 | 2.9 | 3.1 |
| Mb1359  | 31792520  | 32 kDa  | 1.2 | 1.6 | 1.5 | 1.5 | 1.7 | 1.9 |
| Mb3539c | 31794685  | 52 kDa  | 1   | 0.5 | 0.5 | 0.9 | 0.6 | 0.7 |
| Mb2620  | 31793773  | 47 kDa  | 1   | 0.8 | 0.9 | 0.6 | 1.4 | 1.1 |
| Mb3472c | 31794619  | 16 kDa  | 1   | 2.3 | 2.1 | 2   | 2.5 | 3.1 |
| Mb3894  | 31795038  | 44 kDa  | 1.1 | 0.6 | 1   | 0.5 | 1.5 | 1.3 |
| Mb0067c | 31791243  | 83 kDa  | 1   | 1.5 | 1.1 | 1.3 | 0.8 | 0.9 |
| Mb0238  | 31791410  | 36 kDa  | 1   | 0.3 | 0.4 | 0.3 | 1.6 | 1.7 |
| Mb0249  | 31791421  | 46 kDa  | 1   | 1.3 | 0.8 | 1.3 | 0.6 | 0.9 |
| Mb1524  | 31792683  | 41 kDa  | 1   | 0.8 | 0.7 | 1.1 | 1.3 | 0.7 |
| Mb0292  | 31791463  | 145 kDa | 1   | 0.9 | 1   | 1.3 | 1.2 | 1.1 |
| Mb2191c | 31793347  | 15 kDa  | 1.2 | 0.9 | 0.8 | 1.2 | 2   | 1.8 |
| Mb2218  | 31793374  | 47 kDa  | 1   | 0.8 | 0.7 | 0.9 | 1.4 | 1.3 |
| Mb2610  | 31793763  | 34 kDa  | 0.9 | 1.1 | 0.7 | 1.2 | 0.4 | 0.5 |
| Mb2635c | 31793788  | 27 kDa  | 1   | 1.7 | 1.4 | 1.4 | 1   | 1.1 |
| Mb0908c | 31792072  | 40 kDa  | 1   | 1.1 | 1   | 1.1 | 1   | 0.8 |
| Mb2977  | 31794129  | 45 kDa  | 1   | 1   | 0.9 | 1.2 | 1   | 1   |
| Mb3102c | 31794254  | 33 kDa  | 1   | 0.9 | 1   | 1.2 | 1   | 1   |
| Mb3175  | 31794327  | 85 kDa  | 1   | 1.8 | 1.9 | 1.1 | 1.6 | 1.7 |
| Mb3893  | 31795037  | 41 kDa  | 1   | 1.7 | 1.2 | 1.5 | 0.7 | 1.1 |
| Mb0047c | 31791223  | 40 kDa  | 1   | 3.3 | 3.2 | 2.5 | 4.3 | 4.2 |
| Mb1554c | 31792713  | 224 kDa | 1   | 0.7 | 0.7 | 1.3 | 0.8 | 1.1 |
| Mb0735  | 31791900  | 13 kDa  | 1   | 2.5 | 1.9 | 2.2 | 2   | 2.4 |
| Mb3761c | 31794906  | 49 kDa  | 1   | 0.3 | 0.3 | 0.5 | 0.4 | 0.4 |
| Mb0779c | 31791944  | 25 kDa  | 1   | 0.9 | 0.9 | 0.6 | 0.6 | 1   |

|         |          |         |     |     |     |     |     |     |
|---------|----------|---------|-----|-----|-----|-----|-----|-----|
| Mb0854c | 31792019 | 30 kDa  | 1   | 1.2 | 1.2 | 1.2 | 0.9 | 1.1 |
| Mb1501  | 31792660 | 12 kDa  | 0.9 | 1.3 | 1.8 | 1.3 | 0.7 | 0.7 |
| Mb2321c | 31793477 | 73 kDa  | 1   | 0.9 | 1   | 1.6 | 1.7 | 1.5 |
| Mb2397c | 31793553 | 17 kDa  | 0.9 | 1.3 | 1.9 | 0.8 | 0.5 | 0.6 |
| Mb2002c | 31793159 | 25 kDa  | 1.1 | 0   | 0   | 0   | 0.5 | 0.4 |
| Mb0630c | 31791796 | 93 kDa  | 1   | 1   | 0.9 | 0.9 | 1   | 0.8 |
| Mb2638c | 31793791 | 31 kDa  | 1   | 1.5 | 1.1 | 1.4 | 1.2 | 0.9 |
| Mb2993c | 31794145 | 27 kDa  | 1   | 1.8 | 1.3 | 1.8 | 0.8 | 1.1 |
| Mb1967  | 31793124 | 17 kDa  | 1   | 2.7 | 2.5 | 2.3 | 2.7 | 2.2 |
| Mb3072c | 31794224 | 13 kDa  | 1.1 | 1   | 1.2 | 0.9 | 1   | 1.3 |
| Mb3268c | 31794420 | 106 kDa | 1   | 0.9 | 1   | 1   | 1   | 1   |
| Mb0615c | 31791781 | 8 kDa   | 0.9 | 0.8 | 1.5 | 0.7 | 0.7 | 0.7 |
| Mb1139c | 31792302 | 23 kDa  | 1.1 | 1   | 1   | 1.3 | 1.2 | 1.5 |
| Mb0745  | 31791910 | 66 kDa  | 1   | 1.2 | 0.7 | 0.8 | 1.4 | 1   |
| Mb2592  | 31793745 | 36 kDa  | 1   | 1   | 0.9 | 3   | 0.8 | 1   |
| Mb3489c | 31794636 | 14 kDa  | 1   | 2   | 3.2 | 2.6 | 2.1 | 2.9 |
| Mb0056  | 31791232 | 10 kDa  | 1   | 2.3 | 2   | 1.8 | 2.2 | 2.1 |
| Mb2966  | 31794118 | 63 kDa  | 1   | 1   | 1.2 | 1.1 | 1   | 1   |
| Mb3713c | 31794859 | 17 kDa  | 1   | 1.1 | 1   | 0.9 | 0.7 | 0.9 |
| Mb3157c | 31794309 | 23 kDa  | 1   | 1   | 1.1 | 1   | 2   | 1.4 |
| Mb0162  | 31791335 | 49 kDa  | 1   | 1.5 | 1.3 | 1.3 | 1.3 | 1.4 |
| Mb3421c | 31794569 | 30 kDa  | 1.1 | 1.3 | 1.2 | 1.7 | 1.4 | 1.4 |
| Mb0091  | 31791266 | 25 kDa  | 1   | 1.4 | 1.1 | 1.6 | 1.3 | 0.9 |
| Mb0657  | 31791822 | 17 kDa  | 1   | 0.7 | 1   | 0.6 | 1   | 1   |
| Mb2655  | 31793808 | 30 kDa  | 1   | 0.6 | 0.6 | 0.6 | 0.4 | 0.7 |
| Mb2174c | 31793330 | 39 kDa  | 1   | 2   | 1.2 | 3.8 | 2   | 2   |
| Mb0727  | 31791892 | 30 kDa  | 1   | 2.1 | 1.6 | 1.4 | 1.8 | 1.9 |
| Mb3911c | 31795055 | 48 kDa  | 1   | 1.1 | 1   | 1.1 | 1.2 | 0.9 |
| Mb3876  | 31795020 | 23 kDa  | 1.1 | 1.4 | 1.4 | 1   | 1.1 | 1.6 |
| Mb0212c | 31791384 | 101 kDa | 1.1 | 0.7 | 1   | 0.7 | 1.2 | 1.4 |
| Mb0543  | 31791712 | 43 kDa  | 1   | 0.9 | 0.7 | 0.9 | 0.8 | 0.8 |
| Mb1277c | 31792438 | 29 kDa  | 1.1 | 1.5 | 1.2 | 1.2 | 1.4 | 1.4 |
| Mb0008c | 31791185 | 16 kDa  | 1   | 0.6 | 0.7 | 0.8 | 0.6 | 0.6 |
| Mb1960  | 31793117 | 66 kDa  | 1   | 1   | 1   | 1.1 | 1   | 1   |
| Mb1398c | 31792559 | 28 kDa  | 0.9 | 1.9 | 2.3 | 3.6 | 0.7 | 0.7 |
| Mb1483c | 31792642 | 41 kDa  | 1   | 1.2 | 1   | 1.5 | 1.1 | 0.9 |
| Mb2472c | 31793626 | 15 kDa  | 1   | 0.7 | 0.5 | 0.7 | 0.5 | 0.8 |
| Mb2730  | 31793883 | 25 kDa  | 1   | 1.4 | 1.2 | 1.8 | 0.8 | 1.2 |
| Mb2806c | 31793959 | 80 kDa  | 1   | 2   | 0.9 | 1.1 | 1.3 | 2.3 |
| Mb2940c | 31794092 | 55 kDa  | 1   | 1.5 | 1.3 | 1.7 | 1.1 | 1.1 |
| Mb1511c | 31792670 | 102 kDa | 1   | 0.6 | 0.9 | 0.8 | 0.9 | 0.9 |
| Mb3703c | 31794849 | 6 kDa   | 1.2 | 0.6 | 0.6 | 0.4 | 1.5 | 1.8 |

|         |               |         |     |     |     |     |     |     |
|---------|---------------|---------|-----|-----|-----|-----|-----|-----|
| Mb3725  | 31794870      | 25 kDa  | 1   | 1.1 | 0.7 | 1.2 | 0.9 | 1   |
| Mb0160  | 31791333      | 38 kDa  | 1   | 1.5 | 1.3 | 1.8 | 1.4 | 1.4 |
| Mb1519  | 31792678      | 26 kDa  | 1   | 1.2 | 1   | 1.3 | 1   | 0.9 |
| Mb0178  | 31791350      | 57 kDa  | 1.1 | 0.6 | 0.4 | 1   | 0.9 | 1.3 |
| Mb2481c | 31793635      | 40 kDa  | 1   | 1.1 | 1   | 0.9 | 0.9 | 1.8 |
| Mb1183  | 31792345      | 13 kDa  | 0.9 | 1.1 | 0.8 | 1.3 | 0.3 | 0.5 |
| Mb1370  | 31792531      | 10 kDa  | 1.1 | 1   | 1.1 | 0.7 | 5.9 | 1.6 |
| Mb3163  | 31794315      | 50 kDa  | 1   | 2.7 | 2   | 2.4 | 1.5 | 1.4 |
| Mb1439  | 31792598      | 18 kDa  | 0.9 | 0.9 | 0.8 | 1   | 0.4 | 0.4 |
| Mb1498  | 31792657      | 29 kDa  | 1   | 1.5 | 1.8 | 1.9 | 1.4 | 1.2 |
| Mb1917c | 31793076      | 22 kDa  | 1   | 1.9 | 1.9 | 1.5 | 1.6 | 1.2 |
| Mb2076  | 31793233      | 13 kDa  | 1   | 1.2 | 1.4 | 1.2 | 1   | 1.2 |
| Mb2740c | 31793893      | 72 kDa  | 1.1 | 0.6 | 0.7 | 0.8 | 1.3 | 1.3 |
| Mb1812  | 31792972      | 153 kDa | 1   | 0.7 | 0.5 | 0.6 | 0.7 | 0.6 |
| Mb0049c | 31791225      | 31 kDa  | 1   | 1.2 | 1.1 | 1.4 | 0.9 | 1.1 |
| Mb0475  | 31791645      | 30 kDa  | 1   | 0.8 | 0.9 | 1   | 1.1 | 1.1 |
| Mb0562c | 31791730      | 35 kDa  | 1   | 2.1 | 1.6 | 1.4 | 0.8 | 1.3 |
| Mb0655  | 31791820      | 15 kDa  | 1   | 1.4 | 1.2 | 1.7 | 0.7 | 1.2 |
| Mb0838c | 31792003 (+1) | 31 kDa  | 1   | 1   | 0.8 | 1.5 | 1   | 0.8 |
| Mb1760  | 31792919      | 55 kDa  | 1   | 0.7 | 0.8 | 1.3 | 1.3 | 1.6 |
| Mb0920  | 31792084      | 48 kDa  | 1   | 0.6 | 0.5 | 1.1 | 1   | 0.9 |
| Mb2223c | 31793379      | 40 kDa  | 1   | 1.8 | 1.6 | 1.5 | 1.7 | 1.7 |
| Mb3350c | 31794502      | 9 kDa   | 1.1 | 1.3 | 1.6 | 0.9 | 1.3 | 1.7 |
| Mb3750  | 31794895      | 27 kDa  | 1   | 1   | 1.1 | 0.8 | 1   | 0.7 |
| Mb1627  | 31792787      | 23 kDa  | 1.1 | 0.7 | 0.6 | 0.7 | 1   | 1.3 |
| Mb0743  | 31791908      | 7 kDa   | 1   | 3.1 | 2   | 2.1 | 2.3 | 2.7 |
| Mb0660  | 31791825      | 25 kDa  | 1   | 2.8 | 2.1 | 2   | 2.2 | 2.6 |
| Mb1099c | 31792261      | 27 kDa  | 1   | 1.1 | 0.8 | 1.3 | 1.1 | 0.8 |
| Mb3008  | 31794160      | 83 kDa  | 1   | 1   | 1.2 | 1.4 | 0.8 | 1   |
| Mb2565  | 31793718      | 25 kDa  | 1   | 0.6 | 0.6 | 0.7 | 1   | 0.8 |
| Mb2615c | 31793768      | 23 kDa  | 1   | 1   | 1   | 1.1 | 1.1 | 1.1 |
| Mb0169  | 31791342      | 18 kDa  | 1   | 0.6 | 1.6 | 1.9 | 1.1 | 1.1 |
| Mb3898  | 31795042      | 62 kDa  | 1   | 0.7 | 0.8 | 0.6 | 0.8 | 0.8 |
| Mb2455  | 31793609      | 19 kDa  | 0.9 | 2.9 | 2   | 3.3 | 2.5 | 2   |
| Mb2032  | 31793189      | 9 kDa   | 1   | 0.4 | 1.1 | 0.5 | 1.3 | 0.9 |
| Mb0002  | 31791179      | 42 kDa  | 1   | 0.8 | 1   | 1.7 | 1   | 0.8 |
| Mb2893c | 31794045      | 40 kDa  | 1   | 1.3 | 1.3 | 1.2 | 1.5 | 1.3 |
| Mb0248c | 31791420      | 47 kDa  | 1   | 1.4 | 1.1 | 1.8 | 0.8 | 0.9 |
| Mb0897  | 31792061      | 71 kDa  | 1.1 | 0.8 | 0.7 | 1.2 | 1.2 | 1.3 |
| Mb2957  | 31794109      | 162 kDa | 1   | 1.8 | 2.1 | 1.2 | 0.9 | 2.4 |
| Mb1128c | 31792291      | 50 kDa  | 1   | 1.1 | 1   | 0.6 | 1   | 1   |
| Mb0253c | 31791425      | 29 kDa  | 1   | 1.2 | 0.9 | 1.2 | 1   | 1.1 |

|         |          |         |     |     |     |     |     |     |
|---------|----------|---------|-----|-----|-----|-----|-----|-----|
| Mb3168c | 31794320 | 39 kDa  | 1   | 0.4 | 0.6 | 0.5 | 0.7 | 0.8 |
| Mb2374  | 31793530 | 70 kDa  | 1   | 0.8 | 0.7 | 1.3 | 0.8 | 0.8 |
| Mb2900  | 31794052 | 19 kDa  | 1   | 0.2 | 0.2 | 0.2 | 1   | 0.7 |
| Mb0370c | 31791540 | 37 kDa  | 1   | 1.3 | 1.6 | 1.2 | 1.1 | 1.1 |
| Mb3745c | 31794890 | 16 kDa  | 1   | 1.4 | 0.9 | 1.3 | 1   | 1.1 |
| Mb0159c | 31791332 | 44 kDa  | 1   | 0.6 | 0.6 | 0.7 | 0.7 | 0.6 |
| Mb0476  | 31791646 | 47 kDa  | 1   | 2.1 | 1.9 | 1.7 | 1.2 | 2.5 |
| Mb3234c | 31794386 | 9 kDa   | 1   | 1   | 1.1 | 1   | 1.2 | 0.9 |
| Mb0784c | 31791949 | 40 kDa  | 1   | 0.7 | 0.8 | 1.1 | 0.7 | 0.7 |
| Mb0649c | 31791814 | 24 kDa  | 1   | 0.4 | 0.7 | 1.5 | 0.4 | 1.3 |
| Mb0006  | 31791183 | 92 kDa  | 1   | 1.6 | 1.5 | 1.1 | 1.1 | 1.3 |
| Mb0687  | 31791852 | 147 kDa | 1   | 1.8 | 1.6 | 1.6 | 1.5 | 2   |
| Mb1103c | 31792265 | 43 kDa  | 1   | 0.7 | 0.8 | 0.8 | 0.7 | 0.8 |
| Mb0721  | 31791886 | 23 kDa  | 1   | 1.4 | 1.1 | 1.3 | 1.7 | 1.6 |
| Mb1010  | 31792174 | 18 kDa  | 1.1 | 1.6 | 1.8 | 1.4 | 1.7 | 1.6 |
| Mb1273  | 31792434 | 10 kDa  | 1   | 0.7 | 1.2 | 0.8 | 1.6 | 1.1 |
| Mb1777  | 31792936 | 27 kDa  | 1.1 | 0.9 | 0.7 | 1   | 1.6 | 1.3 |
| Mb3036c | 31794188 | 51 kDa  | 1   | 1   | 1   | 0.9 | 1.2 | 1.1 |
| Mb2012c | 31793169 | 12 kDa  | 1   | 0.8 | 1   | 0.7 | 0.8 | 1.1 |
| Mb3016c | 31794168 | 54 kDa  | 1   | 1   | 0.9 | 1   | 0.9 | 0.9 |
| Mb2727c | 31793880 | 9 kDa   | 1   | 1.8 | 1.9 | 0.9 | 0.9 | 1.3 |
| Mb0595c | 31791762 | 18 kDa  | 1   | 0.8 | 0.6 | 1.1 | 0.6 | 0.6 |
| Mb2482c | 31793636 | 69 kDa  | 1   | 0.9 | 0.9 | 1.1 | 1   | 1.3 |
| Mb3027c | 31794179 | 18 kDa  | 1   | 1.3 | 1.2 | 1.6 | 1.1 | 1.2 |
| Mb2487c | 31793641 | 24 kDa  | 1   | 0.9 | 0.7 | 1.3 | 0.8 | 0.6 |
| Mb3313  | 31794465 | 64 kDa  | 0.8 | 0.7 | 1.8 | 1   | 0.7 | 0.8 |
| Mb2077c | 31793234 | 94 kDa  | 1   | 1   | 1.1 | 0.3 | 1.4 | 1.5 |
| Mb3646c | 31794792 | 40 kDa  | 1   | 0.2 | 0.4 | 0.3 | 0.4 | 0.4 |
| Mb3927c | 31795071 | 32 kDa  | 1   | 0.9 | 0.8 | 0.9 | 0.5 | 1   |
| Mb3339  | 31794491 | 46 kDa  | 1   | 1.4 | 1.3 | 1.4 | 3.7 | 3.9 |
| Mb3298  | 31794450 | 76 kDa  | 1   | 0.8 | 1   | 0.5 | 0.8 | 0.8 |
| Mb0833c | 31791998 | 7 kDa   | 1.2 | 0.7 | 1.2 | 0.4 | 1.7 | 1.8 |
| Mb0250c | 31791422 | 66 kDa  | 1   | 1.7 | 1.6 | 1.7 | 1.7 | 3.9 |
| Mb1729c | 31792889 | 22 kDa  | 1   | 1   | 0.9 | 0.8 | 1.2 | 1.1 |
| Mb1164c | 31792327 | 82 kDa  | 1   | 0.9 | 0.7 | 0.9 | 0.7 | 0.8 |
| Mb1668  | 31792828 | 22 kDa  | 1   | 0.9 | 1   | 1.2 | 0.8 | 1   |
| Mb0674  | 31791839 | 39 kDa  | 1   | 0.4 | 0.5 | 0.5 | 0.3 | 0.8 |
| Mb3834c | 31794978 | 36 kDa  | 1   | 2.3 | 1.9 | 1.6 | 1.7 | 2.1 |
| Mb3952c | 31795094 | 41 kDa  | 1   | 1.3 | 1.1 | 2.1 | 1.1 | 1.3 |
| Mb1961c | 31793118 | 17 kDa  | 1   | 0.4 | 0.5 | 0.4 | 0.9 | 0.7 |
| Mb0447c | 31791617 | 34 kDa  | 1   | 1.2 | 1.3 | 0.9 | 1.2 | 1   |
| Mb1947c | 31793105 | 36 kDa  | 1   | 0.8 | 1.1 | 1.2 | 0.7 | 1   |

|         |          |         |     |     |     |     |     |     |
|---------|----------|---------|-----|-----|-----|-----|-----|-----|
| Mb2526c | 31793678 | 29 kDa  | 1   | 2.3 | 2.1 | 1.3 | 1.7 | 1.8 |
| Mb2469c | 31793623 | 11 kDa  | 1   | 1.2 | 1.4 | 1.3 | 17  | 1.6 |
| Mb0725  | 31791890 | 11 kDa  | 1   | 2.4 | 2.1 | 2   | 1.9 | 2.5 |
| Mb0043c | 31791219 | 22 kDa  | 1   | 0.4 | 0.5 | 0.4 | 1   | 0.7 |
| Mb2959  | 31794111 | 193 kDa | 1   | 1.9 | 1.6 | 1.3 | 1.2 | 2.2 |
| Mb0184  | 31791356 | 26 kDa  | 1   | 0.6 | 0.9 | 0.6 | 1.4 | 1.1 |
| Mb0824  | 31791989 | 13 kDa  | 1   | 0.8 | 0.9 | 0.8 | 0.9 | 0.9 |
| Mb0751  | 31791916 | 26 kDa  | 1   | 0.7 | 0.5 | 1   | 0.7 | 0.7 |
| Mb3735c | 31794880 | 36 kDa  | 1   | 1.4 | 1.1 | 1.3 | 1.1 | 1.2 |
| Mb1153  | 31792316 | 36 kDa  | 1   | 1.3 | 1.2 | 1   | 0.8 | 1   |
| Mb2394c | 31793550 | 40 kDa  | 1   | 1.1 | 1.1 | 1.3 | 1.1 | 1.5 |
| Mb3347  | 31794499 | 65 kDa  | 1   | 0.9 | 1.3 | 1.5 | 0.9 | 3.7 |
| Mb2205c | 31793361 | 13 kDa  | 1   | 1.3 | 1.4 | 1   | 1.4 | 1.1 |
| Mb0702  | 31791867 | 18 kDa  | 1   | 1.7 | 1.6 | 1.5 | 1.8 | 2   |
| Mb1856  | 31793015 | 31 kDa  | 1   | 0.8 | 1.5 | 1   | 1.3 | 1.2 |
| Mb3948c | 31795090 | 37 kDa  | 0.9 | 0.7 | 1.1 | 1.3 | 0.8 | 0.7 |
| Mb3807c | 31794951 | 42 kDa  | 1   | 0.7 | 0.8 | 0.8 | 0.8 | 1.1 |
| Mb0153  | 31791326 | 30 kDa  | 1   | 0.9 | 1   | 1.4 | 1   | 0.8 |
| Mb0054  | 31791230 | 11 kDa  | 1   | 0.9 | 1.1 | 1.1 | 0.9 | 0.9 |
| Mb0158c | 31791331 | 30 kDa  | 1   | 1.1 | 1.4 | 1.4 | 1.5 | 1   |
| Mb3429c | 31794577 | 56 kDa  | 1   | 1.2 | 1.3 | 1.1 | 1.1 | 1   |
| Mb0177  | 31791349 | 54 kDa  | 1   | 0.6 | 0.6 | 0.8 | 0.5 | 0.8 |
| Mb3026c | 31794178 | 36 kDa  | 1   | 0.7 | 1.3 | 1.9 | 1.4 | 1.6 |
| Mb0741  | 31791906 | 13 kDa  | 1   | 1   | 1.1 | 1.1 | 0.7 | 1   |
| Mb1129c | 31792292 | 35 kDa  | 1.2 | 1.4 | 1.1 | 1   | 1.9 | 1.9 |
| Mb0014c | 31791191 | 67 kDa  | 1   | 0.8 | 0.6 | 1.1 | 0.9 | 0.8 |
| Mb1143  | 31792306 | 7 kDa   | 1   | 0.9 | 1.4 | 0.7 | 0.7 | 1   |
| Mb0195c | 31791367 | 59 kDa  | 1   | 0.8 | 1   | 0.9 | 0.9 | 0.8 |
| Mb2652c | 31793805 | 12 kDa  | 1   | 0.5 | 1   | 0.8 | 0.9 | 0.9 |
| Mb2593  | 31793746 | 35 kDa  | 1   | 0.9 | 0.9 | 1.2 | 1   | 1   |
| Mb3433  | 31794581 | 28 kDa  | 1   | 1   | 1.3 | 1.2 | 0.9 | 1   |
| Mb0780  | 31791945 | 28 kDa  | 1   | 0.7 | 0.9 | 0.8 | 0.7 | 1   |
| Mb1414  | 31792573 | 21 kDa  | 1   | 0.8 | 0.5 | 0.9 | 1.1 | 0.7 |
| Mb2080  | 31793237 | 25 kDa  | 1   | 1   | 0.8 | 0.9 | 1   | 0.7 |
| Mb0290  | 31791461 | 68 kDa  | 1   | 0.8 | 0.9 | 1.2 | 1.1 | 1.2 |
| Mb0726  | 31791891 | 20 kDa  | 1   | 1.7 | 1.5 | 1.4 | 1.2 | 1.9 |
| Mb3012c | 31794164 | 50 kDa  | 1   | 0.6 | 0.7 | 0.9 | 0.6 | 0.7 |
| Mb0977  | 31792141 | 31 kDa  | 1   | 1.1 | 1.2 | 1.3 | 1.6 | 1.7 |
| Mb2976  | 31794128 | 31 kDa  | 1   | 2.2 | 2   | 2.1 | 1.9 | 1.6 |
| Mb1637  | 31792797 | 28 kDa  | 0.9 | 1.5 | 0.8 | 1.4 | 0.7 | 0.6 |
| Mb1639  | 31792799 | 28 kDa  | 1   | 1.3 | 1   | 1.4 | 0.9 | 1   |
| Mb2549c | 31793701 | 8 kDa   | 1   | 1.4 | 1   | 1.6 | 1   | 1   |



|         |           |         |     |     |     |     |     |     |
|---------|-----------|---------|-----|-----|-----|-----|-----|-----|
| Mb2318  | 31793474  | 33 kDa  | 1   | 0.6 | 0.8 | 1.4 | 0.8 | 0.9 |
| Mb2133c | 31793289  | 27 kDa  | 1   | 1.4 | 0.7 | 1.7 | 0.9 | 1   |
| Mb3601c | 31794747  | 43 kDa  | 1   | 0.9 | 1.1 | 1   | 1   | 0.9 |
| Mb3717  | 31794863  | 38 kDa  | 1.1 | 1.5 | 1.1 | 1.9 | 1.2 | 1.4 |
| Mb2974c | 161511529 | 64 kDa  | 1   | 1.6 | 1.3 | 1.4 | 1.6 | 1.4 |
| Mb1343  | 31792504  | 13 kDa  | 1   | 0.7 | 0.6 | 0.6 | 1.6 | 1.5 |
| Mb0236  | 31791408  | 63 kDa  | 1   | 0.3 | 0.4 | 0.4 | 0.5 | 0.4 |
| Mb1339  | 31792500  | 49 kDa  | 1   | 1   | 0.8 | 1.2 | 0.9 | 0.9 |
| Mb3605  | 31794751  | 22 kDa  | 1   | 1.6 | 1   | 1.9 | 1.3 | 0.9 |
| Mb0478  | 31791648  | 33 kDa  | 1   | 1   | 0.9 | 1   | 1   | 1.1 |
| Mb3278c | 31794430  | 7 kDa   | 1   | 0.9 | 1.4 | 0.6 | 0.8 | 1   |
| Mb1516  | 31792675  | 34 kDa  | 1   | 0.8 | 1   | 0.6 | 0.9 | 1.7 |
| Mb0198  | 31791370  | 37 kDa  | 1   | 1.5 | 1.7 | 1.2 | 1.8 | 1.2 |
| Mb1686  | 31792845  | 44 kDa  | 1   | 0.8 | 0.9 | 0.9 | 0.9 | 0.9 |
| Mb0324  | 31791495  | 22 kDa  | 1   | 0.9 | 1.1 | 1.4 | 1   | 0.9 |
| Mb0923  | 31792087  | 34 kDa  | 1   | 0.9 | 1.1 | 0.9 | 0.9 | 1.1 |
| Mb1327  | 31792488  | 37 kDa  | 1   | 0.6 | 0.8 | 0.6 | 1   | 0.8 |
| Mb1446c | 31792605  | 25 kDa  | 1.1 | 1.2 | 1   | 1.2 | 1.3 | 1.3 |
| Mb2016c | 31793173  | 9 kDa   | 1   | 0.5 | 1.5 | 1.2 | 1.7 | 1.1 |
| Mb0063  | 31791239  | 40 kDa  | 1   | 2   | 1.8 | 1.6 | 1.8 | 1.6 |
| Mb1292c | 31792453  | 17 kDa  | 1   | 0.6 | 0.4 | 0.6 | 0.7 | 0.6 |
| Mb2134c | 31793290  | 30 kDa  | 1   | 2.2 | 1.1 | 3.2 | 1.3 | 0.9 |
| Mb2165c | 31793321  | 48 kDa  | 1   | 1   | 0.9 | 0.8 | 0.6 | 1   |
| Mb3491c | 31794638  | 8 kDa   | 1   | 2.1 | 2.6 | 2.5 | 2.3 | 2.7 |
| Mb0598c | 31791765  | 24 kDa  | 1.1 | 1   | 0.7 | 1.2 | 0.8 | 1.4 |
| Mb2955  | 31794107  | 63 kDa  | 1   | 3.5 | 1.9 | 1.7 | 2.1 | 4.3 |
| Mb2197c | 31793353  | 16 kDa  | 1   | 0.4 | 0.8 | 0.6 | 0.7 | 0.8 |
| Mb0132  | 31791306  | 50 kDa  | 1   | 0.9 | 1   | 0.8 | 0.9 | 0.9 |
| Mb0196  | 31791368  | 10 kDa  | 0.9 | 2.3 | 1.3 | 2   | 0.5 | 0.7 |
| Mb3634c | 31794780  | 43 kDa  | 1.1 | 0.7 | 1.1 | 1.5 | 1.2 | 1.4 |
| Mb3215c | 31794367  | 107 kDa | 1   | 0.9 | 1   | 1   | 0.8 | 0.9 |
| Mb3302c | 31794454  | 42 kDa  | 1   | 0.9 | 0.9 | 0.9 | 0.7 | 0.9 |
| Mb2508c | 31793662  | 62 kDa  | 1   | 0.5 | 0.4 | 0.4 | 0.5 | 0.4 |
| Mb0552  | 31791720  | 55 kDa  | 0.9 | 1   | 1.3 | 1.3 | 0.6 | 0.7 |
| Mb0904  | 31792068  | 16 kDa  | 1   | 0.9 | 0.7 | 1.2 | 0.8 | 0.7 |
| Mb0929  | 31792093  | 26 kDa  | 1   | 1   | 1.2 | 1.4 | 1   | 0.9 |
| Mb2523c | 31793675  | 41 kDa  | 1   | 2.3 | 1.6 | 2.5 | 1.5 | 1.1 |
| Mb2250  | 31793406  | 56 kDa  | 1   | 1.6 | 1.2 | 1.6 | 1.1 | 1.1 |
| Mb2699  | 31793852  | 23 kDa  | 1   | 0.7 | 1.2 | 1   | 1.2 | 1   |
| Mb3488c | 31794635  | 15 kDa  | 1   | 2.7 | 2.1 | 1.9 | 2   | 2.4 |
| Mb1616  | 31792776  | 9 kDa   | 1   | 0.8 | 1.1 | 1.1 | 1.3 | 1   |
| Mb1822  | 31792982  | 32 kDa  | 1   | 1.1 | 0.8 | 1   | 0.8 | 0.6 |

|         |          |        |     |     |     |     |     |     |
|---------|----------|--------|-----|-----|-----|-----|-----|-----|
| Mb3803  | 31794947 | 29 kDa | 1.1 | 1   | 0.9 | 1.6 | 1.8 | 1.3 |
| Mb2905c | 31794057 | 32 kDa | 1   | 0.6 | 1.2 | 0.6 | 0.6 | 0.6 |
| Mb2617c | 31793770 | 47 kDa | 1   | 0.8 | 0.6 | 0.8 | 1.1 | 0.7 |
| Mb3645c | 31794791 | 11 kDa | 1   | 0.9 | 0.8 | 0.9 | 0.4 | 0.9 |
| Mb0207c | 31791379 | 19 kDa | 1   | 1.1 | 1.1 | 1.1 | 1.1 | 1   |
| Mb1362c | 31792523 | 79 kDa | 1   | 0.8 | 0.6 | 0.7 | 0.8 | 0.7 |
| Mb0723  | 31791888 | 11 kDa | 1   | 1   | 1.1 | 0.9 | 1.1 | 0.9 |
| Mb0724  | 31791889 | 31 kDa | 1   | 2.1 | 1.9 | 1.6 | 1.6 | 1.7 |
| Mb2979c | 31794131 | 36 kDa | 1   | 0.7 | 0.6 | 1.6 | 0.5 | 0.5 |
| Mb3519  | 31794665 | 6 kDa  | 1   | 2.5 | 2.6 | 1.4 | 1.4 | 1.2 |
| Mb1529  | 31792688 | 65 kDa | 1   | 0.9 | 1.1 | 1.1 | 0.9 | 1   |
| Mb0484  | 31791654 | 15 kDa | 1   | 1.1 | 1.2 | 1.5 | 1.1 | 1.2 |
| Mb0867c | 31792032 | 23 kDa | 1   | 1.6 | 1.1 | 1.4 | 1.7 | 1.1 |
| Mb2204c | 31793360 | 27 kDa | 1   | 0.9 | 1.2 | 1   | 0.8 | 0.8 |
| Mb2715c | 31793868 | 27 kDa | 1   | 1   | 0.9 | 1.3 | 0.9 | 0.9 |
| Mb2970c | 31794122 | 24 kDa | 1   | 1.4 | 1   | 1.6 | 1.1 | 0.9 |
| Mb3829c | 31794973 | 57 kDa | 1   | 0.8 | 0.7 | 0.8 | 0.9 | 0.7 |
| Mb3309  | 31794461 | 17 kDa | 1   | 0.7 | 1.1 | 0.9 | 0.7 | 1   |
| Mb3909c | 31795053 | 76 kDa | 1   | 0.1 | 0.1 | 0.1 | 0.1 | 0.1 |
| Mb1252c | 31792413 | 22 kDa | 1   | 1.2 | 1   | 1.4 | 0.9 | 1   |
| Mb3320  | 31794472 | 45 kDa | 1   | 1.1 | 1.9 | 1.4 | 1.2 | 0.9 |
| Mb2996  | 31794148 | 30 kDa | 1   | 0.9 | 1.2 | 1.2 | 1.1 | 1   |
| Mb3715  | 31794861 | 24 kDa | 1   | 0.8 | 0.4 | 0.9 | 0.8 | 0.8 |
| Mb0415  | 31791585 | 37 kDa | 1   | 0.6 | 0.8 | 0.6 | 0.7 | 0.8 |
| Mb0438  | 31791608 | 12 kDa | 1   | 1.4 | 1.7 | 1.6 | 1.6 | 1.2 |
| Mb0752c | 31791917 | 35 kDa | 1   | 0.8 | 0.7 | 0.6 | 0.7 | 0.8 |
| Mb0701  | 31791866 | 14 kDa | 1   | 1.9 | 1.7 | 1.8 | 2.1 | 2.3 |
| Mb0707  | 31791872 | 43 kDa | 1   | 0.9 | 0.8 | 1.1 | 1   | 1   |
| Mb3236c | 31794388 | 25 kDa | 1   | 1   | 0.8 | 2   | 0.9 | 0.8 |
| Mb3639c | 31794785 | 22 kDa | 1   | 0.4 | 1.3 | 1.2 | 1.4 | 1.1 |
| Mb0821c | 31791986 | 29 kDa | 1   | 0.8 | 0.8 | 0.8 | 0.8 | 0.9 |
| Mb2089  | 31793246 | 8 kDa  | 1   | 0.9 | 1.5 | 0.9 | 1.2 | 1   |
| Mb2190c | 31793346 | 16 kDa | 1   | 0.8 | 1.2 | 1.3 | 0.9 | 1.1 |
| Mb1241  | 31792402 | 13 kDa | 1   | 1   | 0.6 | 1   | 0.7 | 0.7 |
| Mb2733  | 31793886 | 36 kDa | 1   | 0.9 | 1.5 | 1.8 | 0.8 | 1.1 |
| Mb0650c | 31791815 | 32 kDa | 1   | 0.9 | 1.6 | 1.1 | 1.3 | 1.2 |
| Mb2301  | 31793457 | 48 kDa | 1   | 1   | 1   | 1.3 | 1.1 | 0.8 |
| Mb3301  | 31794453 | 81 kDa | 1   | 0.8 | 0.9 | 0.4 | 1   | 3.1 |
| Mb3514  | 31794660 | 54 kDa | 0.7 | 1.8 | 2.4 | 2.1 | 0.1 | 0.2 |
| Mb2475c | 31793629 | 98 kDa | 1   | 0.9 | 1   | 0.8 | 1   | 0.7 |
| Mb2118c | 31793274 | 26 kDa | 1   | 0.7 | 0.7 | 1.3 | 0.7 | 0.8 |
| Mb0501  | 31791671 | 25 kDa | 1   | 0.8 | 0.8 | 0.7 | 0.8 | 0.4 |

|         |          |         |     |     |     |     |     |     |
|---------|----------|---------|-----|-----|-----|-----|-----|-----|
| Mb1776  | 31792935 | 92 kDa  | 1   | 0.9 | 0.8 | 1.1 | 0.9 | 0.9 |
| Mb3207c | 31794359 | 17 kDa  | 1   | 0.9 | 1.1 | 0.9 | 1.1 | 1   |
| Mb3240  | 31794392 | 22 kDa  | 1   | 1.1 | 1   | 0.9 | 0.8 | 0.9 |
| Mb1279c | 31792440 | 10 kDa  | 1   | 0.9 | 1   | 1.3 | 0.9 | 0.9 |
| Mb3888c | 31795032 | 53 kDa  | 1   | 1.3 | 1.3 | 1.1 | 1.4 | 1.6 |
| Mb3171  | 31794323 | 27 kDa  | 1   | 1.7 | 1.6 | 1.8 | 1.6 | 1.7 |
| Mb1803  | 31792963 | 48 kDa  | 1   | 4.3 | 0.7 | 0.8 | 0.8 | 0.5 |
| Mb2188c | 31793344 | 40 kDa  | 1   | 1.5 | 1.4 | 1   | 0.7 | 1.3 |
| Mb3035c | 31794187 | 37 kDa  | 1   | 1.3 | 1.2 | 0.9 | 0.8 | 0.9 |
| Mb0084  | 31791259 | 12 kDa  | 1   | 1.4 | 1.4 | 1   | 0.8 | 1.2 |
| Mb1326  | 31792487 | 46 kDa  | 1.1 | 0.9 | 1.2 | 0.8 | 1.4 | 1.5 |
| Mb3908  | 31795052 | 27 kDa  | 1.7 | 0.4 | 0.4 | 0.4 | 1.4 | 3.3 |
| Mb2958  | 31794110 | 231 kDa | 1   | 1.6 | 1.7 | 1.9 | 1.6 | 2.8 |
| Mb3243c | 31794395 | 14 kDa  | 1   | 1.2 | 1.7 | 1.2 | 1.3 | 1.2 |
| Mb1706  | 31792865 | 38 kDa  | 1   | 1   | 1   | 1.2 | 1.2 | 1   |
| Mb0015c | 31791192 | 46 kDa  | 1   | 0.9 | 0.8 | 1.2 | 0.8 | 0.8 |
| Mb2354  | 31793510 | 17 kDa  | 1   | 0.9 | 1.5 | 1.1 | 1   | 1.1 |
| Mb0112c | 31791286 | 8 kDa   | 1   | 0.3 | 1.4 | 1.1 | 1.5 | 1.3 |
| Mb3864c | 31795008 | 45 kDa  | 1   | 0.9 | 1.1 | 0.8 | 0.8 | 0.9 |
| Mb0593c | 31791760 | 106 kDa | 1   | 0.9 | 1.1 | 0.8 | 1   | 1.1 |
| Mb2386c | 31793542 | 11 kDa  | 1   | 1.4 | 1.1 | 1.4 | 1.1 | 1.1 |
| Mb3285c | 31794437 | 49 kDa  | 1   | 0.8 | 0.7 | 1   | 0.9 | 1   |
| Mb3037c | 31794189 | 11 kDa  | 1   | 0.9 | 1.1 | 0.7 | 1.1 | 1   |
| Mb3312  | 31794464 | 15 kDa  | 1   | 1.8 | 1   | 1.3 | 1.2 | 1.2 |
| Mb3707  | 31794853 | 85 kDa  | 0.9 | 1.7 | 1.1 | 1.1 | 0.6 | 0.7 |
| Mb0803  | 31791968 | 33 kDa  | 1   | 1.2 | 1.3 | 1.6 | 1   | 1.2 |
| Mb2488c | 31793642 | 22 kDa  | 1   | 1.8 | 0.8 | 1.3 | 0.6 | 0.8 |
| Mb2932c | 31794084 | 9 kDa   | 1   | 0.9 | 1.6 | 1   | 0.9 | 1.1 |
| Mb1586  | 31792745 | 8 kDa   | 1   | 0.6 | 1.3 | 0.8 | 1.6 | 1.1 |
| Mb1472  | 31792631 | 43 kDa  | 1   | 1.8 | 1.6 | 0.9 | 1.7 | 1.9 |
| Mb1021  | 31792185 | 44 kDa  | 1   | 0.4 | 0.5 | 0.5 | 0.6 | 0.6 |
| Mb1879  | 31793038 | 11 kDa  | 1   | 0.8 | 0.8 | 0.7 | 1   | 0.8 |
| Mb2200c | 31793356 | 51 kDa  | 1   | 1.1 | 1.1 | 1.3 | 1.1 | 1.3 |
| Mb1306  | 31792467 | 19 kDa  | 1.2 | 1.3 | 0.9 | 1.8 | 1.5 | 2   |
| Mb3839c | 31794983 | 46 kDa  | 1   | 1.1 | 1.2 | 1.3 | 1.2 | 1.4 |
| Mb1573  | 31792732 | 15 kDa  | 1   | 1.1 | 1.2 | 1.1 | 1.5 | 1.1 |
| Mb2398c | 31793554 | 8 kDa   | 1.1 | 1.1 | 2.5 | 1.3 | 1.2 | 1.7 |
| Mb1643  | 31792803 | 51 kDa  | 1   | 0.9 | 0.8 | 0.8 | 1.1 | 0.9 |
| Mb3441  | 31794588 | 11 kDa  | 1   | 0.8 | 1.1 | 1.1 | 1.3 | 1.1 |
| Mb2646c | 31793799 | 77 kDa  | 1   | 1   | 1   | 0.9 | 1   | 1   |
| Mb1412c | 31792571 | 23 kDa  | 1   | 1   | 1.1 | 1   | 1.2 | 1   |
| Mb0654  | 31791819 | 17 kDa  | 1   | 1   | 0.9 | 0.9 | 1   | 0.9 |

|          |          |         |     |     |     |     |     |     |
|----------|----------|---------|-----|-----|-----|-----|-----|-----|
| Mb2633   | 31793786 | 10 kDa  | 1.1 | 1.3 | 1.6 | 1.7 | 1.3 | 1.6 |
| Mb3077c  | 31794229 | 79 kDa  | 1   | 2.7 | 3   | 2.7 | 2.8 | 2.5 |
| Mb1506   | 31792665 | 13 kDa  | 0.9 | 0.9 | 0.9 | 0.7 | 0.6 | 0.7 |
| Mb2639   | 31793792 | 25 kDa  | 0.9 | 0.8 | 1.1 | 1.9 | 0.8 | 0.6 |
| Mb0577   | 31791744 | 36 kDa  | 1   | 0.9 | 0.8 | 1.1 | 0.9 | 0.9 |
| Mb0180   | 31791352 | 54 kDa  | 1   | 1.2 | 0.7 | 1.5 | 0.7 | 0.9 |
| Mb2564c  | 31793717 | 39 kDa  | 1   | 1.5 | 1   | 2   | 1.2 | 0.9 |
| Mb2492c  | 31793646 | 17 kDa  | 1   | 1.2 | 0.9 | 1.1 | 1   | 1.1 |
| Mb1887c  | 31793046 | 23 kDa  | 1.1 | 3.1 | 0.9 | 0.9 | 2.3 | 3.2 |
| Mb1683   | 31792842 | 41 kDa  | 1   | 0.9 | 0.9 | 0.6 | 1   | 1.1 |
| Mb0217   | 31791389 | 67 kDa  | 1   | 3.2 | 2   | 1.8 | 1.6 | 2.3 |
| Mb3362   | 31794514 | 48 kDa  | 1   | 0.5 | 0.5 | 0.5 | 1.1 | 0.7 |
| Mb1737   | 31792897 | 25 kDa  | 1   | 1.8 | 1.3 | 2.2 | 1.3 | 1.7 |
| Mb3434   | 31794582 | 87 kDa  | 1   | 1   | 0.9 | 1.2 | 0.6 | 0.6 |
| Mb0179   | 31791351 | 42 kDa  | 1   | 0.8 | 0.7 | 1.1 | 0.8 | 0.8 |
| Mb2225c  | 31793381 | 34 kDa  | 1   | 0.6 | 1.8 | 1.1 | 1.6 | 1.1 |
| Mb1225   | 31792386 | 50 kDa  | 1   | 0.8 | 0.6 | 0.6 | 0.9 | 1   |
| Mb0877   | 31792042 | 16 kDa  | 1   | 0.3 | 0.4 | 0.4 | 0.9 | 0.7 |
| Mb1478c  | 31792637 | 18 kDa  | 1   | 0.8 | 0.9 | 0.6 | 0.9 | 1   |
| Mb0539   | 31791708 | 23 kDa  | 1   | 3.1 | 2.1 | 1.4 | 0.9 | 1.1 |
| Mb3074c  | 31794226 | 37 kDa  | 1   | 1.1 | 1.6 | 2.1 | 1.5 | 1.3 |
| Mb1800   | 31792960 | 48 kDa  | 1   | 0.4 | 0.7 | 0.7 | 0.7 | 0.8 |
| Mb3295   | 31794447 | 51 kDa  | 1   | 1.1 | 1   | 0.9 | 1.4 | 1.1 |
| Mb0574c  | 31791741 | 12 kDa  | 1   | 1.7 | 1.8 | 1.2 | 1.3 | 1.3 |
| Mb0204c  | 31791376 | 74 kDa  | 1   | 1.4 | 1.2 | 1.2 | 1.2 | 1.1 |
| Mb0367c  | 31791537 | 15 kDa  | 1.1 | 0.8 | 0.8 | 1.1 | 1.9 | 1.3 |
| Mb0738   | 31791903 | 7 kDa   | 1   | 2.3 | 1.9 | 1.5 | 1.7 | 2.1 |
| Mb0316   | 31791487 | 26 kDa  | 1   | 1.5 | 1.8 | 1.9 | 1.6 | 1.2 |
| Mb2991c  | 31794143 | 120 kDa | 1   | 0.5 | 0.3 | 0.5 | 0.4 | 0.4 |
| Mb1011c  | 31792175 | 16 kDa  | 1.4 | 0.3 | 0.3 | 0.3 | 2   | 3.1 |
| Mb2178c  | 31793334 | 56 kDa  | 0.9 | 0.6 | 1.1 | 0.5 | 0.8 | 0.7 |
| Mb0257c  | 31791429 | 18 kDa  | 1   | 1.3 | 9.2 | 1   | 1.8 | 1.4 |
| Mb2221c  | 31793377 | 31 kDa  | 1   | 1.1 | 0.7 | 1.2 | 0.9 | 0.8 |
| Mb2559Ac | 31793712 | 8 kDa   | 1   | 0.7 | 1   | 0.6 | 1.1 | 1   |
| Mb2890   | 31794042 | 10 kDa  | 1   | 0.8 | 0.9 | 0.7 | 0.9 | 0.9 |
| Mb2234c  | 31793390 | 40 kDa  | 1   | 0.8 | 0.8 | 0.9 | 0.8 | 0.8 |
| Mb2480c  | 31793634 | 21 kDa  | 1   | 1   | 1.1 | 1.2 | 1.1 | 0.8 |
| Mb3473c  | 31794620 | 16 kDa  | 1   | 1.1 | 1   | 1.4 | 1.1 | 0.9 |
| Mb3080c  | 31794232 | 19 kDa  | 1   | 1.2 | 1.6 | 1.8 | 0.8 | 1.3 |
| Mb3846c  | 31794990 | 28 kDa  | 1   | 0.8 | 0.9 | 1   | 0.9 | 1.3 |
| Mb3432   | 31794580 | 38 kDa  | 1   | 1.2 | 1.2 | 1.4 | 1   | 1.1 |
| Mb3117   | 31794269 | 32 kDa  | 1   | 0.9 | 1.1 | 1.3 | 1.2 | 0.6 |

|         |          |         |     |     |     |     |     |     |
|---------|----------|---------|-----|-----|-----|-----|-----|-----|
| Mb3020c | 31794172 | 55 kDa  | 0.9 | 1.1 | 1.1 | 1.2 | 0.6 | 0.6 |
| Mb2451c | 31793607 | 44 kDa  | 1   | 1   | 1.3 | 1   | 1.1 | 0.7 |
| Mb2237c | 31793393 | 64 kDa  | 1   | 1.1 | 1.3 | 1.2 | 0.8 | 1   |
| Mb0882  | 31792047 | 42 kDa  | 1.1 | 0.6 | 0.6 | 0.7 | 1   | 1.3 |
| Mb0689  | 31791854 | 27 kDa  | 1   | 1.5 | 1.6 | 1.4 | 1   | 1.1 |
| Mb3126c | 31794278 | 31 kDa  | 1   | 0.7 | 1   | 1   | 0.8 | 0.8 |
| Mb3736c | 31794881 | 44 kDa  | 1   | 1.1 | 1.3 | 1.9 | 0.8 | 1.1 |
| Mb2870c | 31794022 | 63 kDa  | 1   | 1.2 | 0.8 | 0.9 | 0.8 | 0.8 |
| Mb0516c | 31791686 | 18 kDa  | 0.9 | 0.9 | 1   | 1.5 | 0.6 | 0.6 |
| Mb2585c | 31793738 | 97 kDa  | 1   | 1.3 | 0.8 | 0.7 | 1.1 | 0.9 |
| Mb1685  | 31792844 | 17 kDa  | 1   | 1.8 | 1.4 | 1.3 | 1.1 | 1.1 |
| Mb2702  | 31793855 | 18 kDa  | 1   | 1.7 | 0.8 | 2   | 0.8 | 1.2 |
| Mb1034c | 31792198 | 58 kDa  | 1   | 0.9 | 0.8 | 0.8 | 0.9 | 0.8 |
| Mb2713c | 31793866 | 14 kDa  | 1.1 | 0.4 | 1.4 | 0.9 | 1.2 | 1.6 |
| Mb0389c | 31791559 | 19 kDa  | 1   | 1.1 | 1.1 | 1.3 | 1.3 | 1.1 |
| Mb1049  | 31792212 | 35 kDa  | 1   | 1.2 | 1.3 | 1.4 | 1.4 | 1   |
| Mb0624  | 31791790 | 9 kDa   | 1   | 0.9 | 1.3 | 0.8 | 1.2 | 0.9 |
| Mb1943c | 31793101 | 81 kDa  | 1   | 0.6 | 0.6 | 0.7 | 0.8 | 0.8 |
| Mb0396  | 31791566 | 15 kDa  | 1   | 0.9 | 1.1 | 1.4 | 1   | 1.2 |
| Mb3810  | 31794954 | 30 kDa  | 1   | 1.5 | 1.1 | 1.8 | 1.4 | 1   |
| Mb1513  | 31792672 | 50 kDa  | 1   | 1   | 1   | 0.6 | 1.2 | 0.8 |
| Mb1842c | 31793001 | 42 kDa  | 1   | 1.4 | 0.9 | 1.3 | 1.2 | 1.1 |
| Mb2943c | 31794095 | 12 kDa  | 1.1 | 1.2 | 1   | 1.3 | 2.1 | 1.4 |
| Mb0232c | 31791404 | 46 kDa  | 1   | 1.3 | 0.9 | 1.4 | 0.7 | 0.9 |
| Mb0511  | 31791681 | 30 kDa  | 1   | 1.1 | 0.9 | 1.4 | 0.8 | 0.8 |
| Mb2443c | 31793599 | 14 kDa  | 1   | 1.1 | 0.7 | 1.1 | 0.8 | 0.9 |
| Mb1710A | 31792870 | 8 kDa   | 1   | 1.3 | 2.7 | 1   | 0.9 | 1.3 |
| Mb3065c | 31794217 | 27 kDa  | 1   | 1.1 | 1   | 1.3 | 1   | 1   |
| Mb2756c | 31793909 | 85 kDa  | 1   | 1.6 | 2.2 | 1.8 | 2.1 | 4.1 |
| Mb2164c | 31793320 | 19 kDa  | 1   | 0.9 | 1.1 | 1.3 | 0.9 | 0.8 |
| Mb2484c | 31793638 | 47 kDa  | 1   | 0.8 | 1   | 1.1 | 0.8 | 0.8 |
| Mb1233c | 31792394 | 33 kDa  | 1   | 1.1 | 1.1 | 1.7 | 0.7 | 0.9 |
| Mb2497  | 31793651 | 15 kDa  | 1   | 1.3 | 0.8 | 1.3 | 0.9 | 0.9 |
| Mb3132c | 31794284 | 42 kDa  | 1   | 1.4 | 1.2 | 1.7 | 0.9 | 1   |
| Mb2139c | 31793295 | 67 kDa  | 1   | 1.2 | 1.5 | 1.1 | 1.3 | 1.1 |
| Mb3747  | 31794892 | 47 kDa  | 1   | 1.4 | 1.2 | 1.1 | 1   | 1   |
| Mb2794c | 31793947 | 17 kDa  | 1   | 1.1 | 0.7 | 1.1 | 1.2 | 0.8 |
| Mb3940  | 31795083 | 124 kDa | 1   | 1.3 | 1.3 | 1.6 | 1.4 | 1.1 |
| Mb3695c | 31794841 | 41 kDa  | 1   | 1.7 | 0.7 | 1.5 | 1   | 0.8 |
| Mb3623  | 31794769 | 11 kDa  | 1   | 0.9 | 1   | 1.2 | 1.1 | 0.9 |
| Mb2269  | 31793425 | 43 kDa  | 1   | 1.9 | 1.7 | 2.1 | 1.6 | 2.3 |
| Mb1124  | 31792287 | 31 kDa  | 1   | 2.1 | 4.3 | 1.4 | 3.5 | 2.1 |

|         |          |         |     |     |     |     |     |     |
|---------|----------|---------|-----|-----|-----|-----|-----|-----|
| Mb0596  | 31791763 | 8 kDa   | 1   | 0.6 | 0.9 | 0.8 | 0.7 | 0.8 |
| Mb0018c | 31791195 | 54 kDa  | 1   | 0.8 | 1.6 | 1.7 | 1.5 | 1.4 |
| Mb2316  | 31793472 | 44 kDa  | 1   | 0.6 | 0.7 | 0.7 | 0.8 | 0.8 |
| Mb0536c | 31791705 | 15 kDa  | 1   | 0.3 | 0.3 | 0.3 | 0.9 | 0.7 |
| Mb1458  | 31792617 | 35 kDa  | 1   | 0.8 | 0.8 | 1.2 | 0.8 | 0.6 |
| Mb2950c | 31794102 | 25 kDa  | 1   | 2.5 | 1.9 | 1.8 | 0.6 | 0.7 |
| Mb2656  | 31793809 | 32 kDa  | 1   | 0.4 | 0.9 | 0.3 | 0.8 | 1.4 |
| Mb0474c | 31791644 | 53 kDa  | 0.8 | 1.4 | 2.5 | 1.2 | 0.4 | 0.3 |
| Mb0166  | 31791339 | 47 kDa  | 1   | 1.6 | 1.5 | 1.3 | 1.4 | 1.6 |
| Mb0426  | 31791596 | 52 kDa  | 1   | 0.9 | 1.4 | 1.2 | 1.1 | 1.1 |
| Mb0181  | 31791353 | 22 kDa  | 1   | 0.9 | 1   | 1.8 | 1.1 | 0.9 |
| Mb2539  | 31793691 | 23 kDa  | 1   | 1.8 | 1.1 | 1.9 | 1   | 1   |
| Mb0182  | 31791354 | 35 kDa  | 1   | 1   | 1.1 | 1.1 | 1.2 | 1.2 |
| Mb3017c | 31794169 | 25 kDa  | 1   | 1.7 | 1.1 | 1.5 | 1   | 1   |
| Mb0190  | 31791362 | 27 kDa  | 1   | 2.3 | 2.3 | 1.7 | 2.6 | 1.8 |
| Mb2138  | 31793294 | 23 kDa  | 1   | 1   | 0.9 | 1.2 | 1   | 1   |
| Mb0311  | 31791482 | 33 kDa  | 1   | 0.5 | 0.5 | 0.5 | 0.6 | 0.5 |
| Mb0397  | 31791567 | 43 kDa  | 1   | 0.8 | 0.8 | 0.9 | 1.2 | 1.1 |
| Mb0473c | 31791643 | 21 kDa  | 1   | 0.8 | 0.8 | 0.8 | 0.8 | 0.9 |
| Mb0499  | 31791669 | 27 kDa  | 1   | 0.8 | 1.1 | 0.5 | 1   | 1   |
| Mb0507  | 31791677 | 35 kDa  | 1   | 0.7 | 0.9 | 0.9 | 0.9 | 1   |
| Mb0652  | 31791817 | 9 kDa   | 1   | 0.8 | 1.1 | 1   | 0.8 | 0.7 |
| Mb3173  | 31794325 | 27 kDa  | 1   | 2.1 | 2.3 | 2   | 1.9 | 1.7 |
| Mb1100c | 31792262 | 36 kDa  | 1   | 0.9 | 0.9 | 1.1 | 0.9 | 0.9 |
| Mb2217  | 31793373 | 29 kDa  | 1   | 1   | 0.9 | 1.1 | 0.9 | 0.9 |
| Mb1250c | 31792411 | 33 kDa  | 1   | 0.7 | 0.6 | 0.9 | 0.8 | 1.2 |
| Mb0740  | 31791905 | 19 kDa  | 1   | 2.1 | 1.7 | 1.8 | 1.6 | 2.1 |
| Mb1499  | 31792658 | 45 kDa  | 1   | 1   | 1.1 | 1.2 | 1.1 | 1.1 |
| Mb3239c | 31794391 | 29 kDa  | 1   | 3.4 | 2.9 | 1.3 | 2   | 1.8 |
| Mb1530  | 31792689 | 81 kDa  | 1   | 0.8 | 0.7 | 1.1 | 0.9 | 0.9 |
| Mb0578  | 31791745 | 31 kDa  | 1   | 1   | 0.9 | 0.9 | 1.1 | 1.6 |
| Mb2907c | 31794059 | 27 kDa  | 1   | 1.3 | 0.9 | 1.3 | 0.9 | 0.9 |
| Mb0028  | 31791204 | 12 kDa  | 1   | 0.4 | 0.9 | 1.5 | 1.2 | 1   |
| Mb1863  | 31793022 | 99 kDa  | 1   | 0.9 | 1   | 0.9 | 0.8 | 0.9 |
| Mb1875c | 31793034 | 74 kDa  | 1   | 1.7 | 1   | 2.2 | 1.2 | 1.7 |
| Mb0023  | 31791200 | 27 kDa  | 1   | 0.8 | 0.7 | 0.5 | 0.5 | 0.5 |
| Mb2194c | 31793350 | 33 kDa  | 1   | 1.5 | 1.1 | 1.7 | 2.5 | 1.5 |
| Mb2246c | 31793402 | 50 kDa  | 1   | 0.7 | 0.7 | 1   | 0.8 | 0.8 |
| Mb2282c | 31793438 | 38 kDa  | 1   | 0.7 | 0.7 | 0.7 | 0.7 | 0.6 |
| Mb2623c | 31793776 | 37 kDa  | 1   | 1.1 | 1.3 | 1.5 | 1.2 | 1.6 |
| Mb2695c | 31793848 | 26 kDa  | 1   | 1   | 1.1 | 1.2 | 1.2 | 1.2 |
| Mb2956  | 31794108 | 199 kDa | 1   | 1.6 | 1.7 | 1.6 | 1   | 1.9 |

|         |          |         |   |     |     |     |     |     |
|---------|----------|---------|---|-----|-----|-----|-----|-----|
| Mb2912c | 31794064 | 51 kDa  | 1 | 0.9 | 0.9 | 1.1 | 0.9 | 0.9 |
| Mb1509  | 31792668 | 7 kDa   | 1 | 0.3 | 0.6 | 0.6 | 0.5 | 0.3 |
| Mb3223  | 31794375 | 9 kDa   | 1 | 1.2 | 1.1 | 1.2 | 1.5 | 1.3 |
| Mb1301c | 31792462 | 25 kDa  | 1 | 0.3 | 0.3 | 0.4 | 0.4 | 0.5 |
| Mb3225c | 31794377 | 38 kDa  | 1 | 0.8 | 0.8 | 0.8 | 0.8 | 1   |
| Mb0374c | 31791544 | 14 kDa  | 1 | 0.7 | 2.1 | 1.4 | 1.6 | 1.4 |
| Mb3256  | 31794408 | 46 kDa  | 1 | 1.1 | 0.9 | 0.9 | 0.9 | 1.1 |
| Mb1636  | 31792796 | 25 kDa  | 1 | 1.1 | 0.9 | 1.1 | 0.9 | 0.7 |
| Mb3283c | 31794435 | 43 kDa  | 1 | 0.8 | 0.9 | 0.9 | 0.9 | 1.1 |
| Mb2219  | 31793375 | 61 kDa  | 1 | 0.8 | 1   | 0.9 | 2   | 2.5 |
| Mb3311  | 31794463 | 33 kDa  | 1 | 1.1 | 1   | 1.4 | 0.9 | 1   |
| Mb1300c | 31792461 | 13 kDa  | 1 | 0.7 | 0.4 | 0.6 | 0.6 | 0.8 |
| Mb3348  | 31794500 | 29 kDa  | 1 | 0.9 | 1   | 1   | 0.9 | 3.2 |
| Mb3424c | 31794572 | 32 kDa  | 1 | 0.6 | 0.6 | 0.4 | 0.9 | 0.8 |
| Mb2863c | 31794015 | 19 kDa  | 1 | 2   | 1.8 | 2.2 | 2   | 2   |
| Mb3369c | 31794521 | 36 kDa  | 1 | 1.2 | 1   | 1.1 | 1   | 0.9 |
| Mb3466c | 31794613 | 68 kDa  | 1 | 0.9 | 1   | 0.9 | 0.8 | 0.8 |
| Mb2236  | 31793392 | 53 kDa  | 1 | 0.8 | 0.8 | 1   | 0.7 | 0.8 |
| Mb3515c | 31794661 | 33 kDa  | 1 | 0.8 | 0.9 | 1   | 0.9 | 1   |
| Mb3019c | 31794171 | 35 kDa  | 1 | 1.3 | 1.4 | 1.5 | 1.1 | 1.1 |
| Mb3329c | 31794481 | 25 kDa  | 1 | 1.1 | 1.1 | 0.9 | 1.4 | 0.9 |
| Mb3820  | 31794964 | 27 kDa  | 1 | 1.3 | 1.3 | 1   | 1.2 | 1.3 |
| Mb1046c | 31792209 | 52 kDa  | 1 | 0.5 | 0.6 | 0.6 | 0.6 | 0.9 |
| Mb0547c | 31791715 | 35 kDa  | 1 | 0.8 | 0.9 | 1.1 | 1.1 | 1.1 |
| Mb0955c | 31792119 | 31 kDa  | 1 | 0.6 | 0.6 | 0.7 | 0.6 | 0.7 |
| Mb0300  | 31791471 | 36 kDa  | 1 | 0.8 | 1   | 0.9 | 0.9 | 1   |
| Mb3372  | 31794524 | 47 kDa  | 1 | 0.6 | 0.5 | 0.5 | 0.3 | 4.1 |
| Mb2181c | 31793337 | 52 kDa  | 1 | 0.9 | 0.8 | 0.9 | 0.8 | 1   |
| Mb3806  | 31794950 | 34 kDa  | 1 | 0.5 | 0.5 | 0.4 | 0.6 | 0.6 |
| Mb0364c | 31791534 | 47 kDa  | 1 | 0.7 | 0.7 | 0.7 | 0.9 | 0.8 |
| Mb1680  | 31792839 | 36 kDa  | 1 | 0.9 | 1.1 | 1   | 0.9 | 1.1 |
| Mb2911  | 31794063 | 15 kDa  | 1 | 2   | 1.2 | 1.8 | 1   | 1.6 |
| Mb2271  | 31793427 | 50 kDa  | 1 | 0.6 | 1.8 | 1.1 | 0.8 | 1.6 |
| Mb1954c | 31793111 | 17 kDa  | 1 | 1.1 | 0.7 | 1.2 | 0.9 | 0.8 |
| Mb2087c | 31793244 | 15 kDa  | 1 | 1   | 0.9 | 1.3 | 0.8 | 0.8 |
| Mb1664  | 31792824 | 106 kDa | 1 | 1.3 | 1.3 | 1.5 | 1.4 | 1.8 |
| Mb1512  | 31792671 | 20 kDa  | 1 | 0.7 | 1.7 | 1.3 | 1.3 | 1.2 |
| Mb2021c | 31793178 | 27 kDa  | 1 | 1.3 | 1.3 | 1.5 | 1.4 | 1.3 |
| Mb1450  | 31792609 | 46 kDa  | 1 | 0.8 | 0.9 | 0.8 | 0.7 | 1.1 |
| Mb0538  | 31791707 | 22 kDa  | 1 | 1.1 | 0.6 | 1.1 | 0.7 | 0.7 |
| Mb1373  | 31792534 | 29 kDa  | 1 | 1   | 1.3 | 1.2 | 1   | 1   |
| Mb1593c | 31792752 | 24 kDa  | 1 | 0.9 | 0.5 | 0.5 | 0.6 | 0.6 |

|         |          |         |   |     |     |     |     |     |
|---------|----------|---------|---|-----|-----|-----|-----|-----|
| Mb3520  | 31794666 | 56 kDa  | 1 | 1   | 1   | 1.2 | 0.9 | 0.9 |
| Mb2109  | 31793266 | 31 kDa  | 1 | 2   | 1   | 1.6 | 0.8 | 0.8 |
| Mb3493  | 31794640 | 38 kDa  | 1 | 0.8 | 1.1 | 1   | 0.9 | 1.2 |
| Mb2233c | 31793389 | 40 kDa  | 1 | 1.1 | 2.4 | 1.3 | 1.6 | 1.3 |
| Mb0418c | 31791588 | 82 kDa  | 1 | 0.4 | 0.7 | 0.4 | 0.7 | 0.9 |
| Mb0524  | 31791693 | 59 kDa  | 1 | 2.8 | 1.6 | 1.2 | 2.6 | 2.2 |
| Mb2788c | 31793941 | 27 kDa  | 1 | 0.4 | 0.3 | 0.5 | 0.5 | 0.4 |
| Mb0847c | 31792012 | 39 kDa  | 1 | 1.8 | 2.8 | 1.7 | 2.6 | 2.1 |
| Mb3039c | 31794191 | 75 kDa  | 1 | 0.6 | 0.7 | 0.7 | 0.8 | 0.8 |
| Mb1358  | 31792519 | 40 kDa  | 1 | 2.7 | 2.4 | 3.8 | 2.3 | 2.5 |
| Mb0691  | 31791856 | 59 kDa  | 1 | 1.1 | 1   | 1.4 | 1.2 | 1.5 |
| Mb2779c | 31793932 | 9 kDa   | 1 | 1   | 1.2 | 0.8 | 1.5 | 1   |
| Mb3076c | 31794228 | 28 kDa  | 1 | 1.1 | 1.7 | 1.4 | 1.6 | 1   |
| Mb3011c | 31794163 | 22 kDa  | 1 | 1.1 | 1.4 | 1.2 | 1   | 1.7 |
| Mb2665c | 31793818 | 10 kDa  | 1 | 0.4 | 0.4 | 0.3 | 0.5 | 0.4 |
| Mb1918c | 31793077 | 35 kDa  | 1 | 2.1 | 1.8 | 1.5 | 1.7 | 1.9 |
| Mb3292c | 31794444 | 38 kDa  | 1 | 0.8 | 1   | 1.1 | 1   | 1.2 |
| Mb0239c | 31791411 | 54 kDa  | 1 | 1   | 1   | 1.6 | 1.7 | 1.6 |
| Mb0005  | 31791182 | 78 kDa  | 1 | 1.4 | 1.8 | 2.3 | 1.2 | 1.7 |
| Mb2155c | 31793311 | 28 kDa  | 1 | 0.7 | 0.9 | 0.9 | 0.8 | 0.7 |
| Mb2561c | 31793714 | 14 kDa  | 1 | 1.3 | 1   | 1.1 | 1   | 0.9 |
| Mb0042  | 31791218 | 108 kDa | 1 | 1   | 1.1 | 1.3 | 1.2 | 1.1 |
| Mb3272c | 31794424 | 61 kDa  | 1 | 1.6 | 1.3 | 1.7 | 1.4 | 1.4 |
| Mb0841  | 31792006 | 28 kDa  | 1 | 0.9 | 1   | 1.4 | 0.7 | 1.1 |
| Mb1045c | 31792208 | 35 kDa  | 1 | 1.4 | 1.6 | 1.7 | 1.3 | 1.1 |
| Mb0134c | 31791308 | 37 kDa  | 1 | 1.9 | 1.3 | 1.8 | 1.4 | 1.4 |
| Mb3709  | 31794855 | 38 kDa  | 1 | 0.7 | 0.6 | 0.5 | 0.8 | 0.6 |
| Mb2124c | 31793280 | 51 kDa  | 1 | 1   | 1.1 | 1   | 1.1 | 1.1 |
| Mb3685  | 31794831 | 31 kDa  | 1 | 1.8 | 2.2 | 1.7 | 1.9 | 1.4 |
| Mb3471c | 31794618 | 46 kDa  | 1 | 1.5 | 1.7 | 0.8 | 2   | 2.3 |
| Mb0925  | 31792089 | 19 kDa  | 1 | 0.8 | 0.8 | 0.5 | 0.8 | 0.7 |
| Mb0939c | 31792103 | 41 kDa  | 1 | 1.3 | 2   | 1.6 | 1.6 | 1.5 |
| Mb2130c | 31793286 | 9 kDa   | 1 | 1   | 1.4 | 0.7 | 1.1 | 1   |
| Mb1305  | 31792466 | 20 kDa  | 1 | 0.8 | 0.7 | 1   | 0.9 | 1   |
| Mb0703  | 31791868 | 77 kDa  | 1 | 1.4 | 1.3 | 1.3 | 1.4 | 1.7 |
| Mb3523c | 31794669 | 26 kDa  | 1 | 0.9 | 0.9 | 1.3 | 1.1 | 0.8 |
| Mb1677  | 31792837 | 88 kDa  | 1 | 0.9 | 1.3 | 0.8 | 0.9 | 0.8 |
| Mb0356  | 31791526 | 24 kDa  | 1 | 1.3 | 1.1 | 1.4 | 1.3 | 1   |
| Mb3005c | 31794157 | 39 kDa  | 1 | 0.8 | 0.6 | 1.1 | 0.9 | 1.1 |
| Mb3830c | 31794974 | 186 kDa | 1 | 0.9 | 0.6 | 0.8 | 0.9 | 1.1 |
| Mb2972c | 31794124 | 75 kDa  | 1 | 0.9 | 0.8 | 0.8 | 1.1 | 0.9 |
| Mb0883  | 31792048 | 76 kDa  | 1 | 0.8 | 1   | 1.2 | 1   | 0.7 |



|         |          |         |   |     |     |     |     |     |
|---------|----------|---------|---|-----|-----|-----|-----|-----|
| Mb0308  | 31791479 | 8 kDa   | 1 | 1   | 0.9 | 1   | 1.1 | 0.8 |
| Mb0836c | 31792001 | 24 kDa  | 1 | 0.6 | 0.9 | 2.4 | 2.5 | 1.6 |
| Mb3944  | 31795086 | 36 kDa  | 1 | 0.3 | 1.5 | 0.6 | 1.2 | 0.7 |
| Mb0463c | 31791633 | 17 kDa  | 1 | 1.4 | 2.4 | 1.9 | 1.9 | 1.4 |
| Mb3749c | 31794894 | 47 kDa  | 1 | 1   | 0.9 | 1.4 | 1   | 0.7 |
| Mb3619c | 31794765 | 22 kDa  | 1 | 0.9 | 0.6 | 1.5 | 0.7 | 0.8 |
| Mb1824  | 31792984 | 60 kDa  | 1 | 0.6 | 1.1 | 1.3 | 1.6 | 1.1 |
| Mb2509c | 31793663 | 52 kDa  | 1 | 0.5 | 0.6 | 0.4 | 0.7 | 0.4 |
| Mb1571  | 31792730 | 28 kDa  | 1 | 0.7 | 0.8 | 1   | 0.7 | 1.9 |
| Mb0739  | 31791904 | 14 kDa  | 1 | 2.3 | 1.6 | 1.5 | 1.7 | 2.1 |
| Mb2659c | 31793812 | 16 kDa  | 1 | 0.9 | 1.5 | 1.1 | 7.3 | 4.1 |
| Mb2945c | 31794097 | 44 kDa  | 1 | 2   | 1.2 | 1.8 | 1.6 | 1.8 |
| Mb2493c | 31793647 | 23 kDa  | 1 | 0.7 | 0.6 | 0.6 | 0.6 | 0.7 |
| Mb0793  | 31791958 | 30 kDa  | 1 | 0.8 | 1.3 | 1.2 | 1.4 | 0.9 |
| Mb3410  | 31794558 | 24 kDa  | 1 | 1.7 | 1.8 | 1.5 | 1.5 | 1.2 |
| Mb1811  | 31792971 | 54 kDa  | 1 | 1   | 0.7 | 0.6 | 0.8 | 0.7 |
| Mb2927c | 31794079 | 32 kDa  | 1 | 2.5 | 2.3 | 1   | 1.8 | 1.5 |
| Mb1520  | 31792679 | 29 kDa  | 1 | 2.1 | 1.7 | 1.1 | 1.8 | 1.6 |
| Mb0289  | 31791460 | 33 kDa  | 1 | 0.8 | 1.3 | 1.3 | 1.7 | 1.4 |
| Mb3524c | 31794670 | 60 kDa  | 1 | 0.7 | 0.7 | 0.8 | 0.7 | 0.6 |
| Mb1341  | 31792502 | 34 kDa  | 1 | 0.6 | 0.9 | 1.2 | 1.7 | 1.6 |
| Mb1703  | 31792862 | 26 kDa  | 1 | 0.5 | 1.5 | 1.1 | 1.6 | 1   |
| Mb1775  | 31792934 | 51 kDa  | 1 | 1.4 | 0.9 | 1.7 | 1   | 1.1 |
| Mb2175c | 31793331 | 34 kDa  | 1 | 1   | 0.9 | 1.2 | 1.1 | 0.8 |
| Mb0051  | 31791227 | 71 kDa  | 1 | 2.5 | 1   | 1.3 | 1.8 | 1   |
| Mb0869c | 31792034 | 54 kDa  | 1 | 0.8 | 1.4 | 0.6 | 1.7 | 1   |
| Mb3082  | 31794234 | 38 kDa  | 1 | 0.5 | 0.6 | 0.7 | 1.3 | 0.6 |
| Mb2553c | 31793705 | 326 kDa | 1 | 0.5 | 0.6 | 0.9 | 0.6 | 0.8 |
| Mb1860  | 31793019 | 18 kDa  | 1 | 0.8 | 0.7 | 1   | 0.8 | 0.8 |
| Mb1596  | 31792755 | 40 kDa  | 1 | 0.3 | 0.9 | 0.8 | 0.9 | 0.8 |
| Mb2855  | 31794007 | 27 kDa  | 1 | 0.8 | 2.5 | 1.8 | 2.3 | 1.2 |
| Mb0993  | 31792157 | 10 kDa  | 1 | 0.4 | 1.8 | 1.7 | 2.1 | 1.2 |
| Mb0340  | 31791511 | 13 kDa  | 1 | 1   | 0.8 | 1.3 | 0.9 | 1   |
| Mb1837  | 31792997 | 40 kDa  | 1 | 1.7 | 0.7 | 2   | 0.8 | 0.8 |
| Mb1452  | 31792611 | 16 kDa  | 1 | 1   | 1   | 0.9 | 1.2 | 0.8 |
| Mb0242c | 31791414 | 6 kDa   | 1 | 0.6 | 1.9 | 0.8 | 1.3 | 1.3 |
| Mb0515c | 31791685 | 35 kDa  | 1 | 0.6 | 0.6 | 1.5 | 0.6 | 1.1 |
| Mb3237  | 31794389 | 57 kDa  | 1 | 0.8 | 1.1 | 1.6 | 1.2 | 1.2 |
| Mb2975c | 31794127 | 41 kDa  | 1 | 1.2 | 1.2 | 1.5 | 1   | 1.2 |
| Mb2323  | 31793479 | 24 kDa  | 1 | 0.6 | 0.7 | 0.8 | 0.7 | 0.7 |
| Mb1263c | 31792424 | 20 kDa  | 1 | 0.8 | 0.6 | 0.8 | 0.5 | 0.5 |
| Mb0641c | 31791807 | 25 kDa  | 1 | 1.1 | 2.3 | 2.1 | 2.6 | 1.9 |

|         |          |        |   |     |     |     |     |     |
|---------|----------|--------|---|-----|-----|-----|-----|-----|
| Mb1655  | 31792815 | 98 kDa | 1 | 0.4 | 0.5 | 0.8 | 0.5 | 0.4 |
| Mb3640c | 31794786 | 82 kDa | 1 | 1   | 1.3 | 1.6 | 1.6 | 1.3 |
| Mb1877c | 31793036 | 15 kDa | 1 | 0.2 | 0.5 | 0.4 | 0.5 | 0.3 |
| Mb2041  | 31793198 | 26 kDa | 1 | 2   | 1.2 | 1.8 | 1.2 | 1.6 |
| Mb0412  | 31791582 | 49 kDa | 1 | 0.5 | 0.6 | 0.9 | 0.6 | 0.6 |
| Mb1517  | 31792676 | 36 kDa | 1 | 0.5 | 0.3 | 1.1 | 0.3 | 0.3 |
| Mb2961  | 31794113 | 36 kDa | 1 | 2.4 | 1.7 | 1.6 | 1.8 | 2.1 |
| Mb0439  | 31791609 | 17 kDa | 1 | 0.9 | 1.3 | 1.2 | 1.3 | 1   |
| Mb3445c | 31794592 | 55 kDa | 1 | 0.3 | 3.7 | 0.2 | 0.7 | 0.2 |
| Mb0222  | 31791394 | 36 kDa | 1 | 0.6 | 1.3 | 0.7 | 0.7 | 0.6 |
| Mb1443  | 31792602 | 24 kDa | 1 | 1.7 | 1   | 1.8 | 1.2 | 1.5 |
| Mb0948c | 31792112 | 73 kDa | 1 | 0.8 | 1.8 | 1.8 | 1.8 | 1.4 |
| Mb3164  | 31794316 | 43 kDa | 1 | 1.8 | 1.6 | 1.3 | 1.3 | 1.3 |
| Mb0142c | 31791315 | 20 kDa | 1 | 1.3 | 1.5 | 1.4 | 1.1 | 1.3 |
| Mb0276  | 31791448 | 60 kDa | 1 | 0.3 | 0.5 | 0.4 | 0.4 | 0.3 |
| Mb1809  | 31792969 | 20 kDa | 1 | 1.3 | 0.9 | 2.4 | 1   | 0.9 |
| Mb1851  | 31793010 | 58 kDa | 1 | 0.6 | 0.8 | 1.2 | 1.5 | 0.8 |
| Mb2626  | 31793779 | 9 kDa  | 1 | 1.3 | 1.8 | 1   | 1.8 | 1.3 |
| Mb3742c | 31794887 | 22 kDa | 1 | 1.7 | 0.8 | 1.5 | 1   | 1.5 |
| Mb1570  | 31792729 | 37 kDa | 1 | 1.2 | 1.2 | 1.3 | 0.9 | 1.2 |
| Mb0347  | 31791518 | 18 kDa | 1 | 0.8 | 1   | 0.7 | 0.9 | 0.9 |
| Mb1043c | 31792206 | 22 kDa | 1 | 1.1 | 1.3 | 1.5 | 1.6 | 1.7 |
| Mb1385  | 31792546 | 26 kDa | 1 | 0.6 | 0.6 | 0.7 | 0.6 | 0.5 |
| Mb0076  | 31791251 | 43 kDa | 1 | 0.7 | 1.1 | 1.1 | 1.5 | 1.3 |
| Mb0970  | 31792134 | 27 kDa | 1 | 0.7 | 1.2 | 0.6 | 1.3 | 0.8 |
| Mb2883c | 31794035 | 48 kDa | 1 | 1.1 | 0.9 | 1.4 | 1   | 0.9 |
| Mb2583c | 31793736 | 45 kDa | 1 | 1.4 | 0.6 | 1.4 | 0.9 | 0.9 |
| Mb2362  | 31793518 | 33 kDa | 1 | 1.1 | 1.4 | 0.8 | 1.4 | 0.9 |
| Mb3916c | 31795060 | 56 kDa | 1 | 0.9 | 1   | 0.9 | 1.3 | 0.9 |
| Mb2284  | 31793440 | 22 kDa | 1 | 0.8 | 0.7 | 0.9 | 0.6 | 0.6 |
| Mb3785c | 31794929 | 33 kDa | 1 | 1.1 | 0.8 | 1.9 | 1   | 1.2 |
| Mb1137c | 31792300 | 9 kDa  | 1 | 0.8 | 0.9 | 1.3 | 1.6 | 1.5 |
| Mb0149  | 31791322 | 31 kDa | 1 | 0.3 | 0.7 | 1.5 | 1.1 | 0.7 |
| Mb2229  | 31793385 | 26 kDa | 1 | 0.9 | 1.6 | 0.7 | 1.5 | 1.1 |
| Mb0812  | 31791977 | 24 kDa | 1 | 0.4 | 0.4 | 0.6 | 0.3 | 0.4 |
| Mb0845c | 31792010 | 73 kDa | 1 | 1.4 | 1.6 | 1   | 1.1 | 0.9 |
| Mb1266  | 31792427 | 19 kDa | 1 | 0.5 | 0.4 | 0.7 | 0.4 | 0.3 |
| Mb2213c | 31793369 | 40 kDa | 1 | 1.7 | 2   | 1.2 | 2   | 1   |
| Mb2555  | 31793707 | 8 kDa  | 1 | 0.5 | 1.4 | 0.7 | 1.5 | 0.8 |
| Mb3635c | 31794781 | 17 kDa | 1 | 2   | 1.2 | 1   | 1   | 0.6 |

Table S8: Primerpairs used for QPCR in this study

| <b>Primer</b> | <b>Sequence</b>        |
|---------------|------------------------|
| esxI_Fw       | TCCAGGTGATCTACGAGCAG   |
| esxI_Rv       | GTTTGTGCCATGTTGTTGC    |
| Mb3440_Fw     | CACCAACCGCTATGACTACG   |
| Mb3440_Rv     | CTCGAACACCTGACGGAAG    |
| Mb0951_Fw     | CTCGACACGGACTCGTTCTA   |
| Mb0951_Rv     | GCAAACGATTTTCGTATGTCG  |
| glpD2_Fw      | TCGGTGATGTTTGTTCATTCC  |
| glpD2_Rv      | GTCGAGGTTCCAGTCGGTAT   |
| desA3_Fw      | GAGGTCTGCGACAGATACGA   |
| desA3_Rv      | TACTTATCCGGCAACGACAG   |
| Mb3614c_Fw    | GAAGGCCTGGACAAGGTTT    |
| Mb3614c_Rv    | GATGCGAGTTTCTCGAGGTT   |
| PPE40_Fw      | TTGCAAACATTGGCTCTTTC   |
| PPE40_Rv      | TCTGGCTACCCGAATTTACC   |
| PE_PGRS57_Fw  | ATGAGGTGTCTGCCCGTATT   |
| PE_PGRS57_Rv  | GTACTIONAAGGCCTGCACAAA |
| mtc28_Fw      | GAGCCGACAAGTACCTGGTT   |
| mtc28_Rv      | ACCACTTGAATCCGTTGAC    |
| whiB1_Fw      | AACAGTGGTCCGGCACTT     |
| whiB1_Rv      | GTCCTGGCCGGTATTCAGT    |
| whiB6_Fw      | AAGATCCCGATCGTTGGAC    |
| whiB6_Rv      | CCTGATTCGGGAATTACGAC   |
| sigA_Fw       | TGATTTCTGTCTGGGATGAAG  |
| sigA_Rv       | TGCCGATCTGTTTGAGGTAG   |
| PE13_Fw       | GCGATGTATCAGTCCGTGAG   |
| PE13_Rv       | GACTTCAGTGGCCGCATAC    |
| esxL_Fw       | GATGTGCGACGATCATGGC    |
| esxL_Rv       | AAAGTCACTCGCGGTCAAC    |

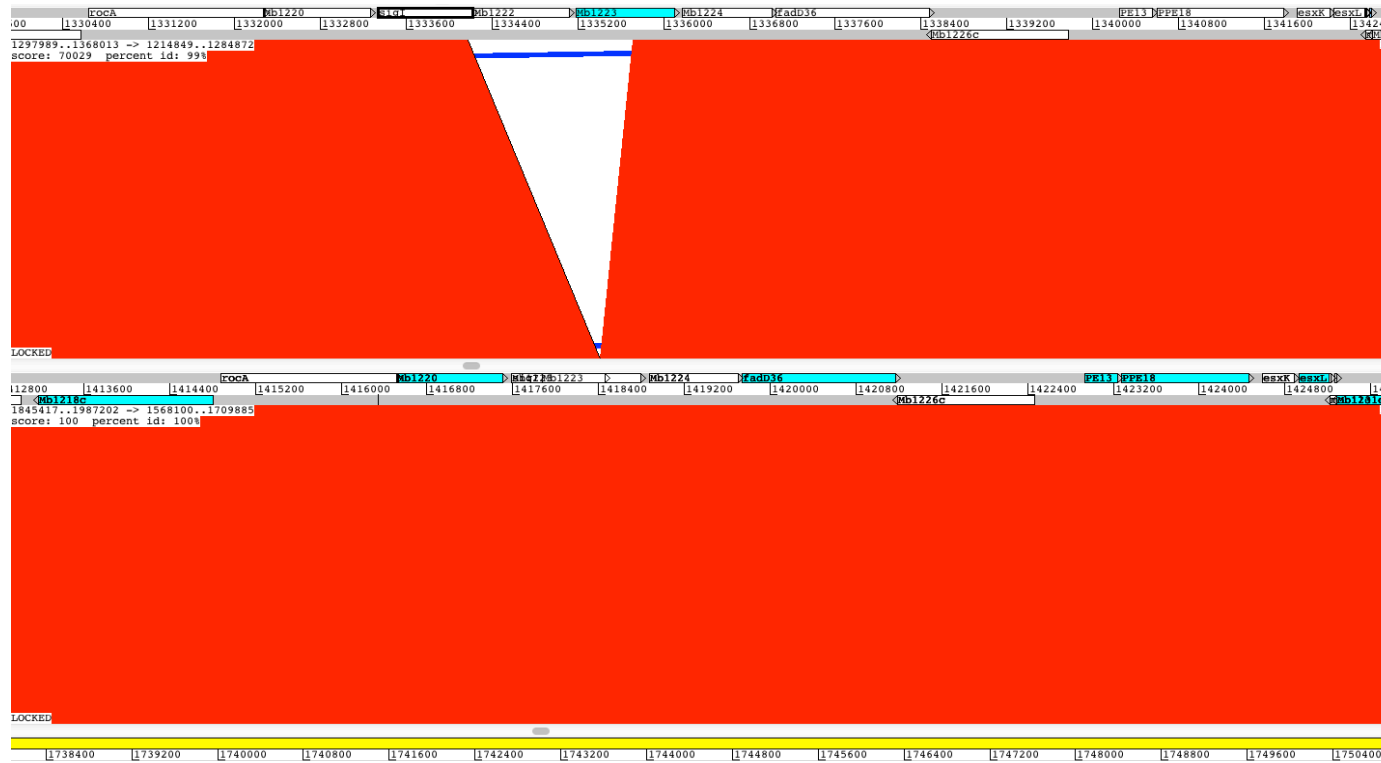

*M. bovis*

BCG China (this study)

BCG China (Zhang et al)

Figure S1

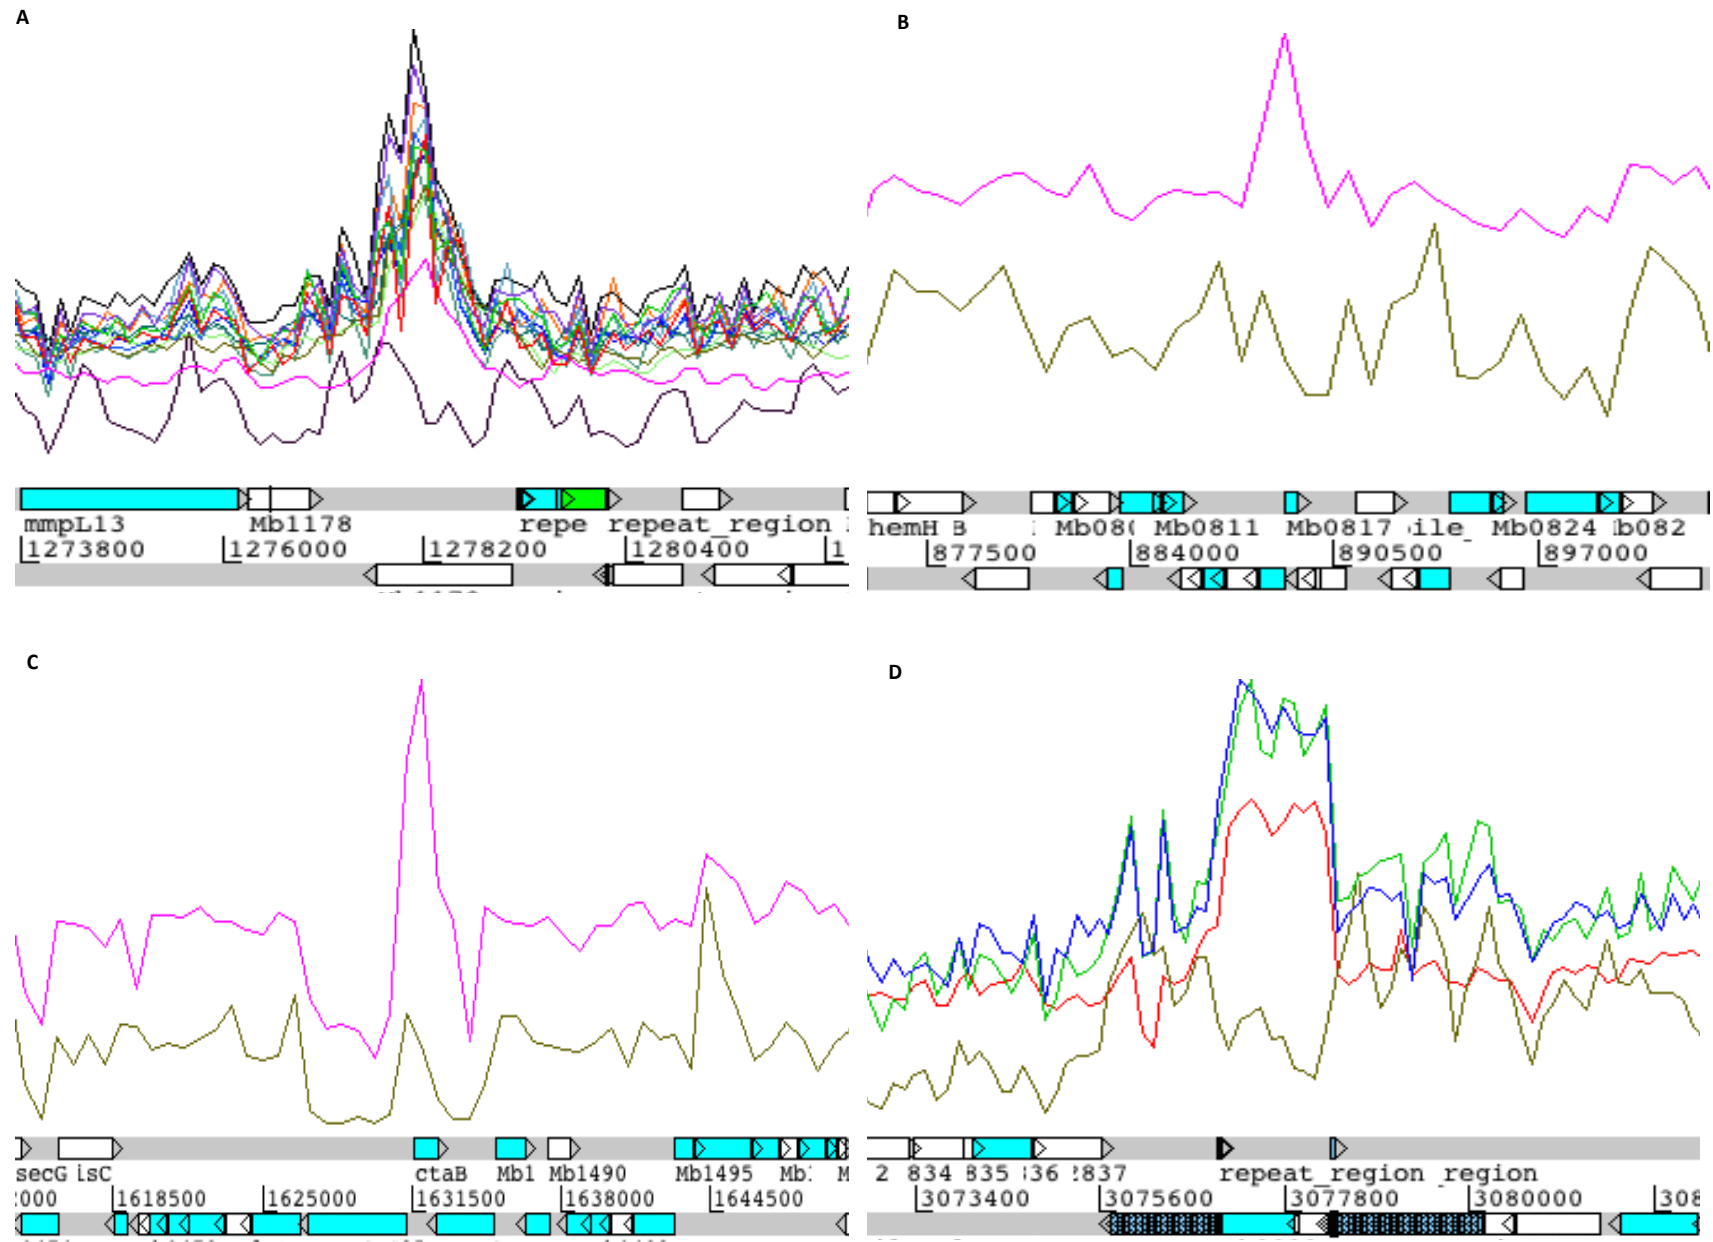

Figure S2

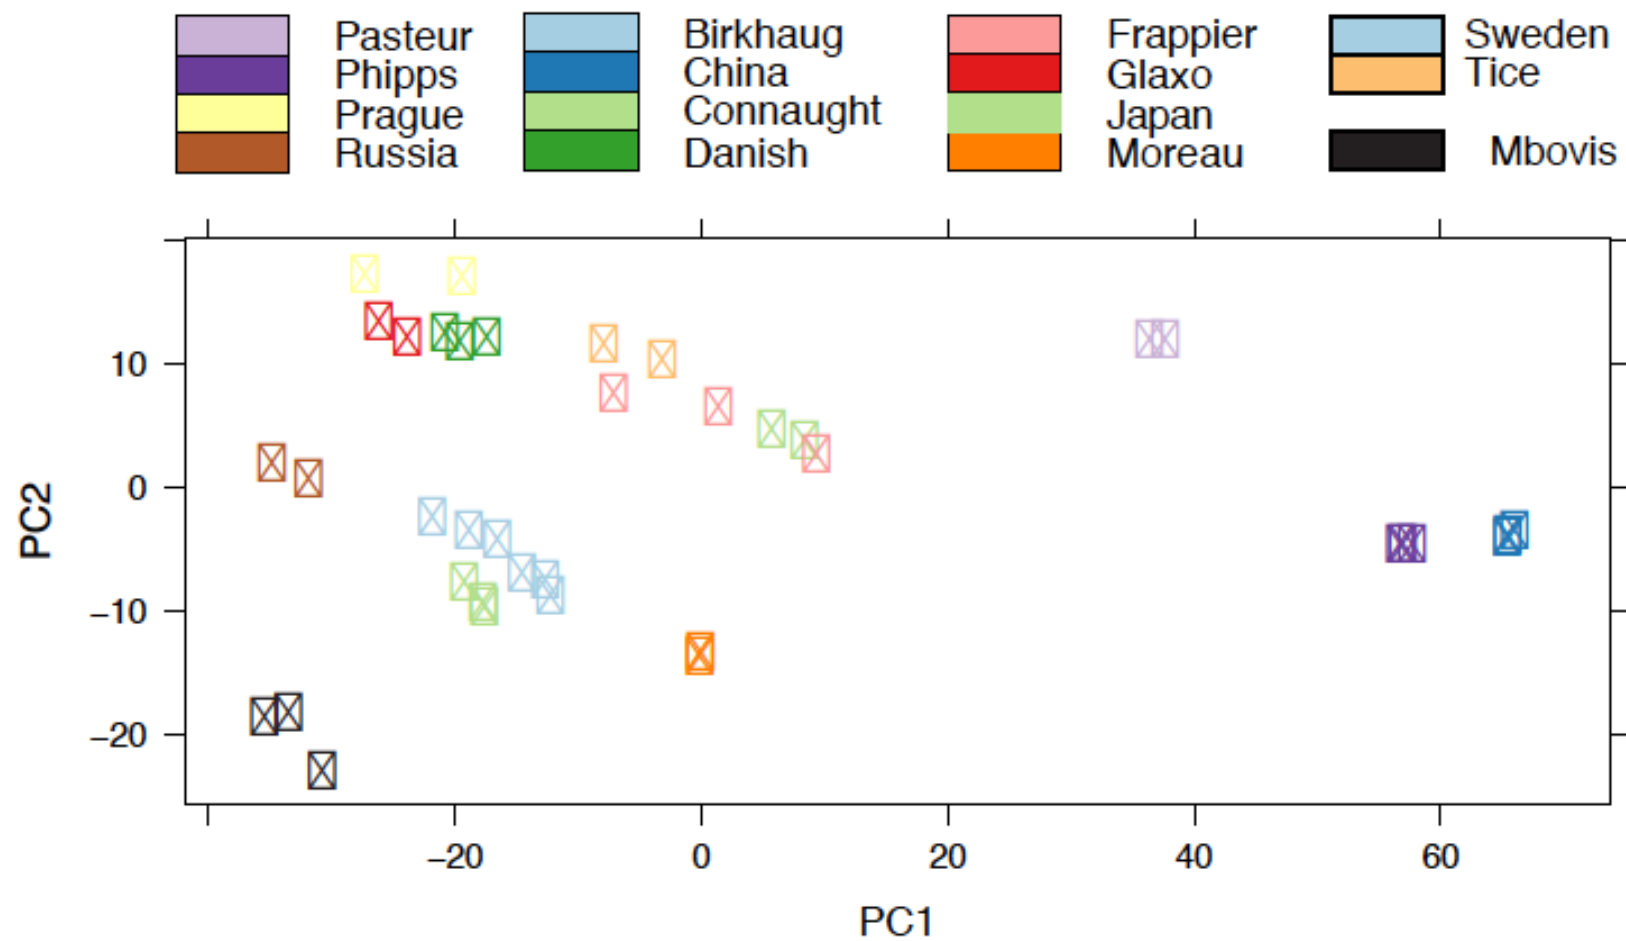

Figure S3

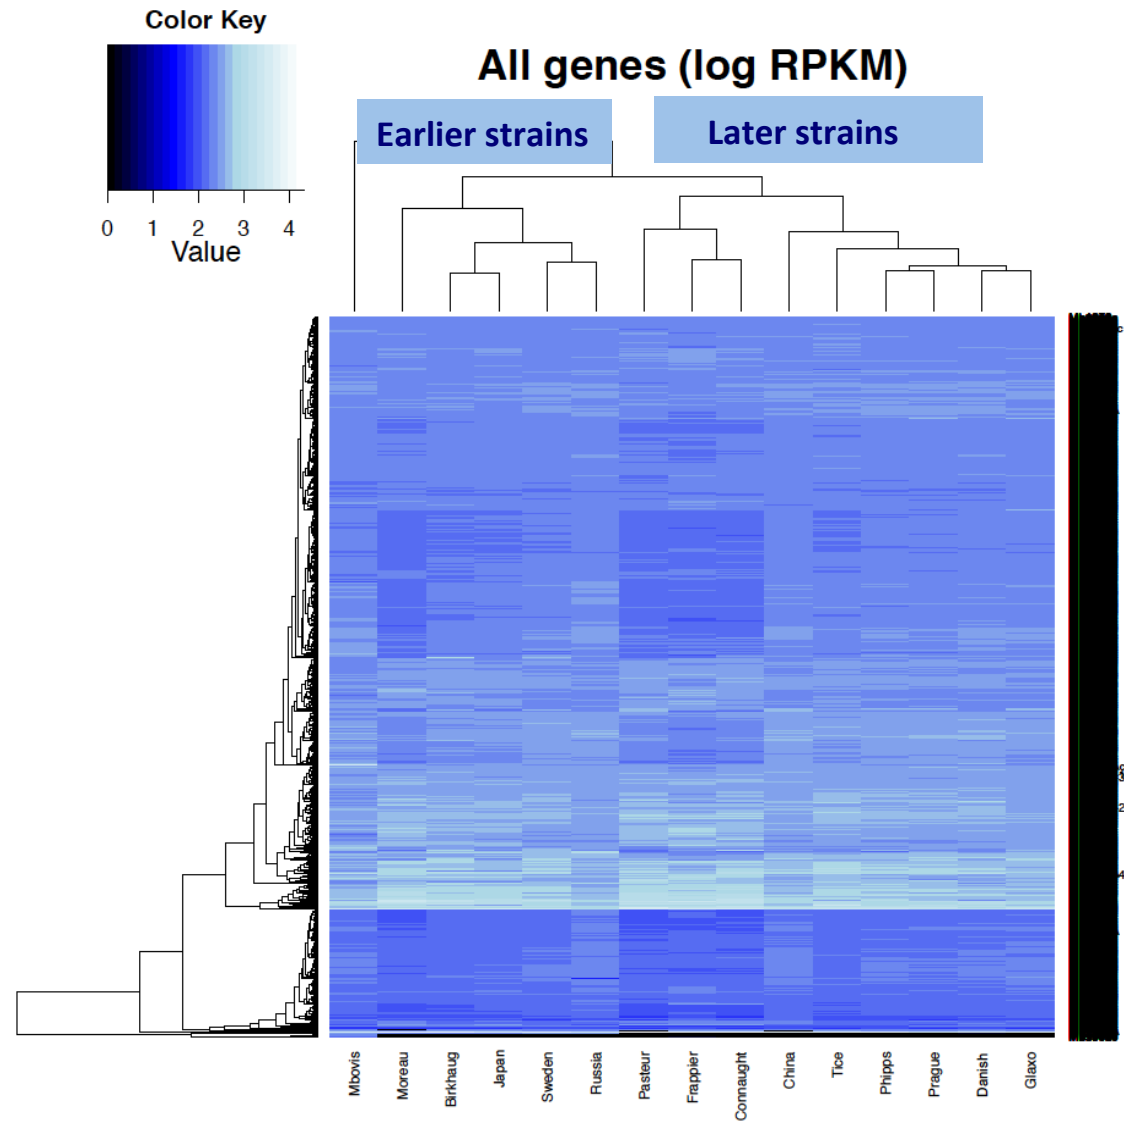

**Figure S4**

Pasteur

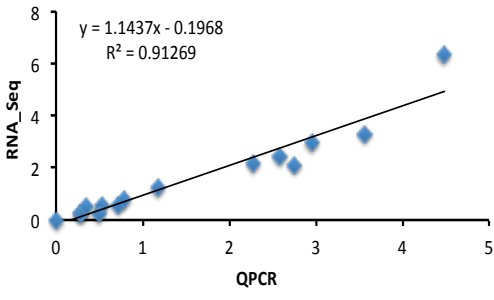

Japan

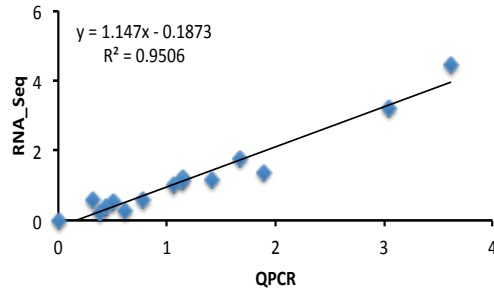

Tice

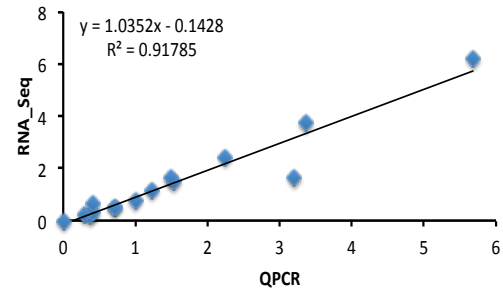

Danish

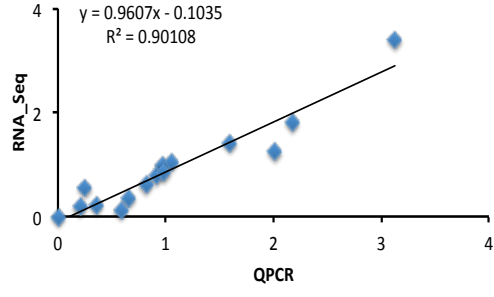

Phipps

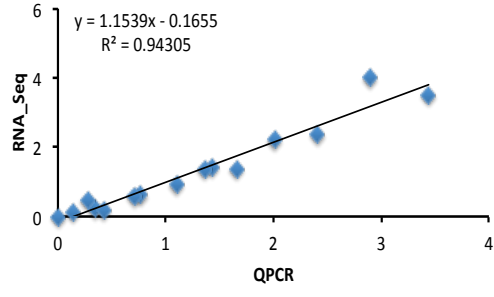

Connaught

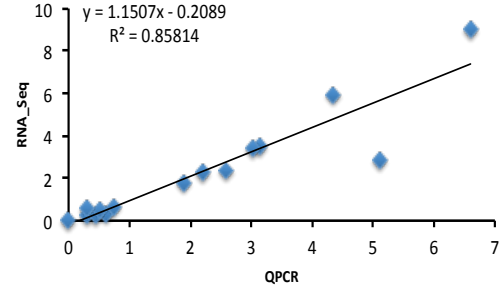

Prague

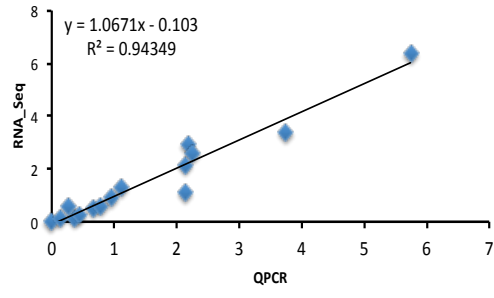

Birkhaug

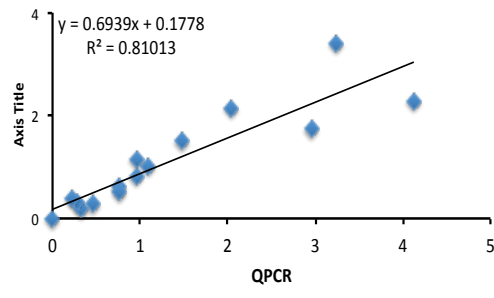

Frappier

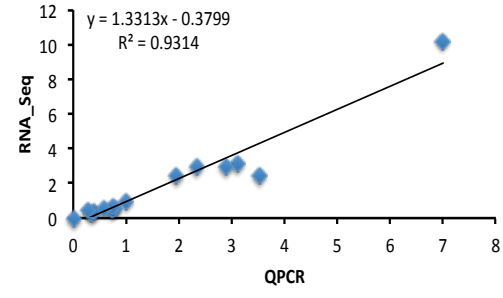

Glaxo

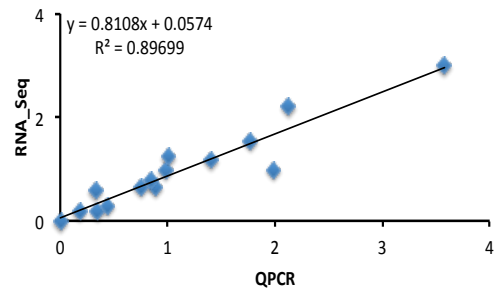

Russia

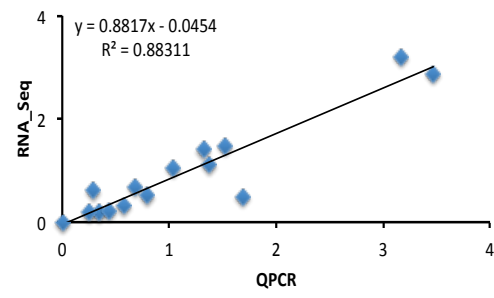

Sweden

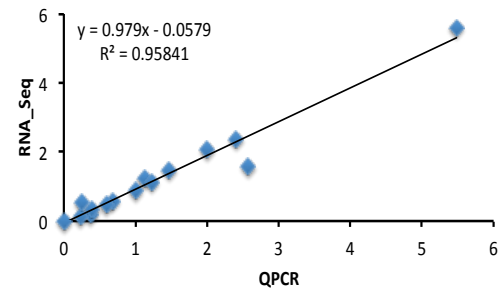

Moreau

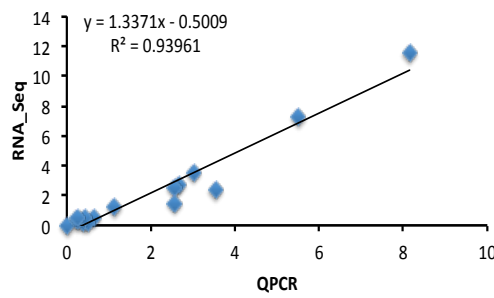

China

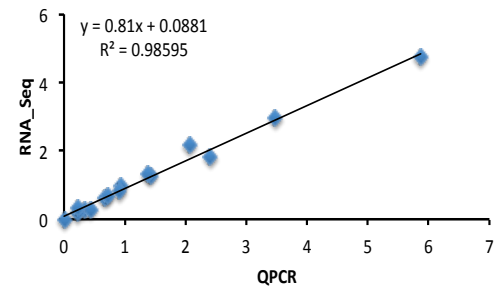

Figure S5



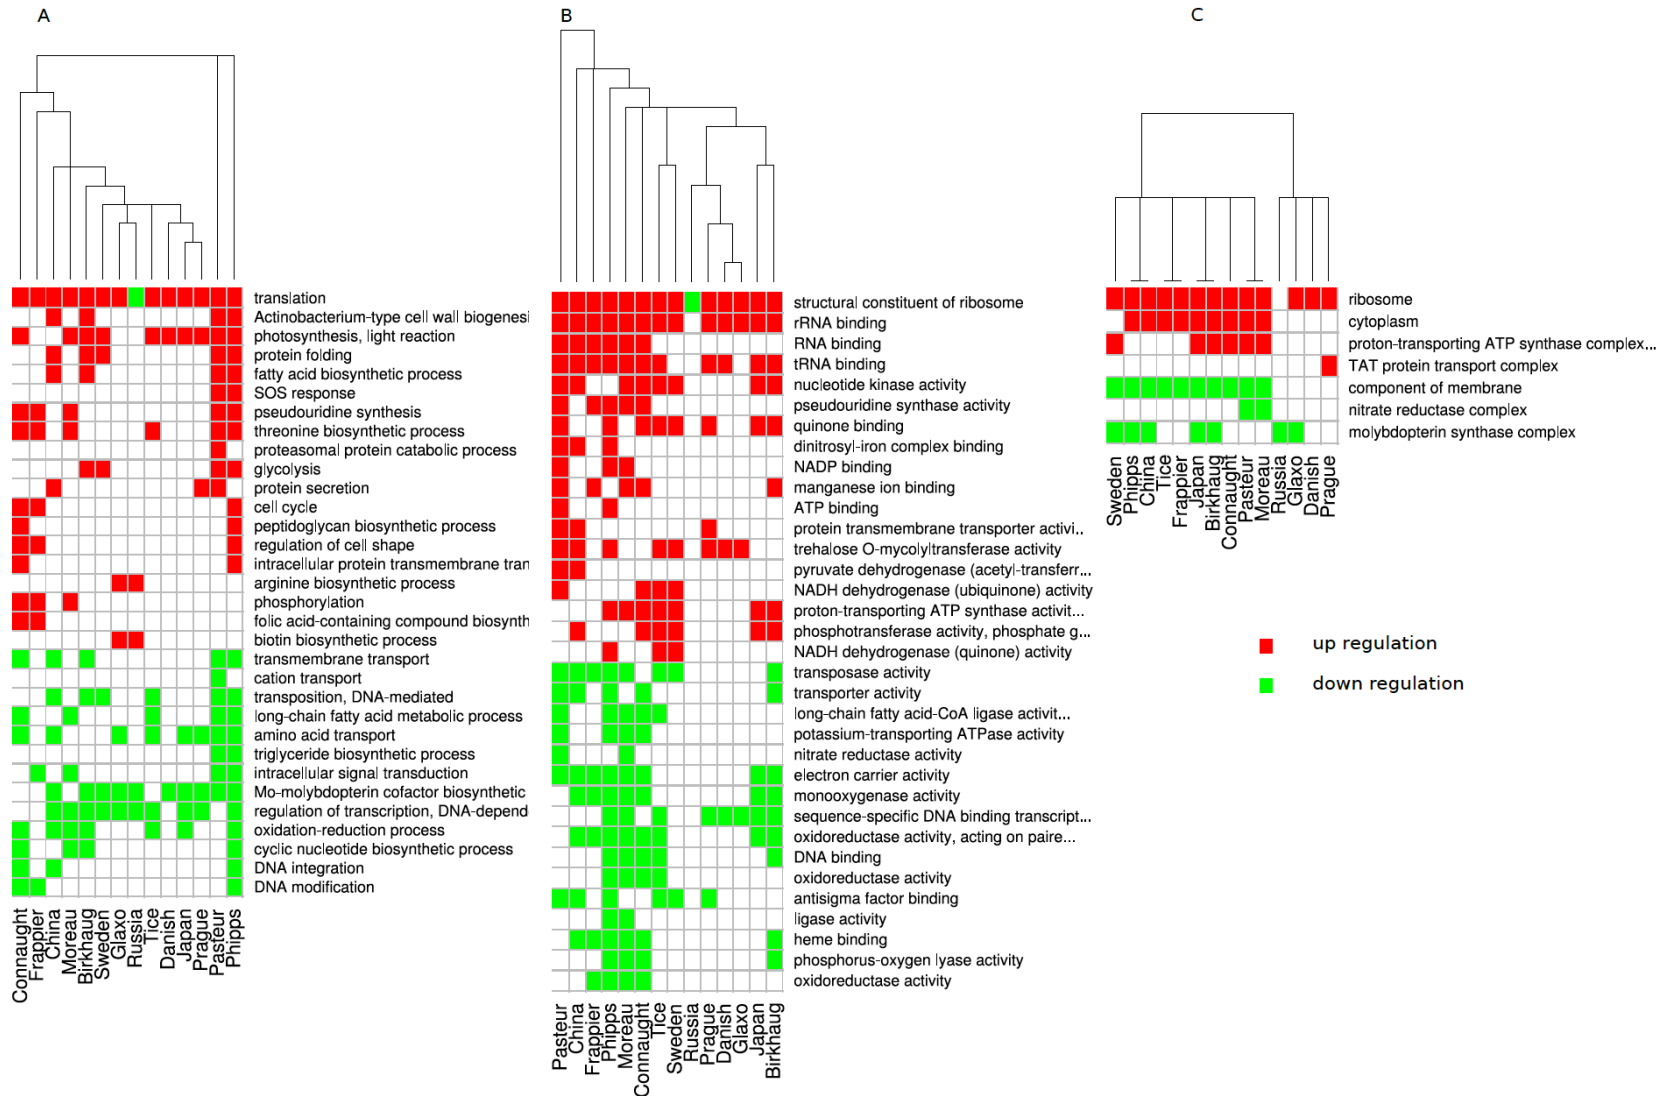

Figure S6

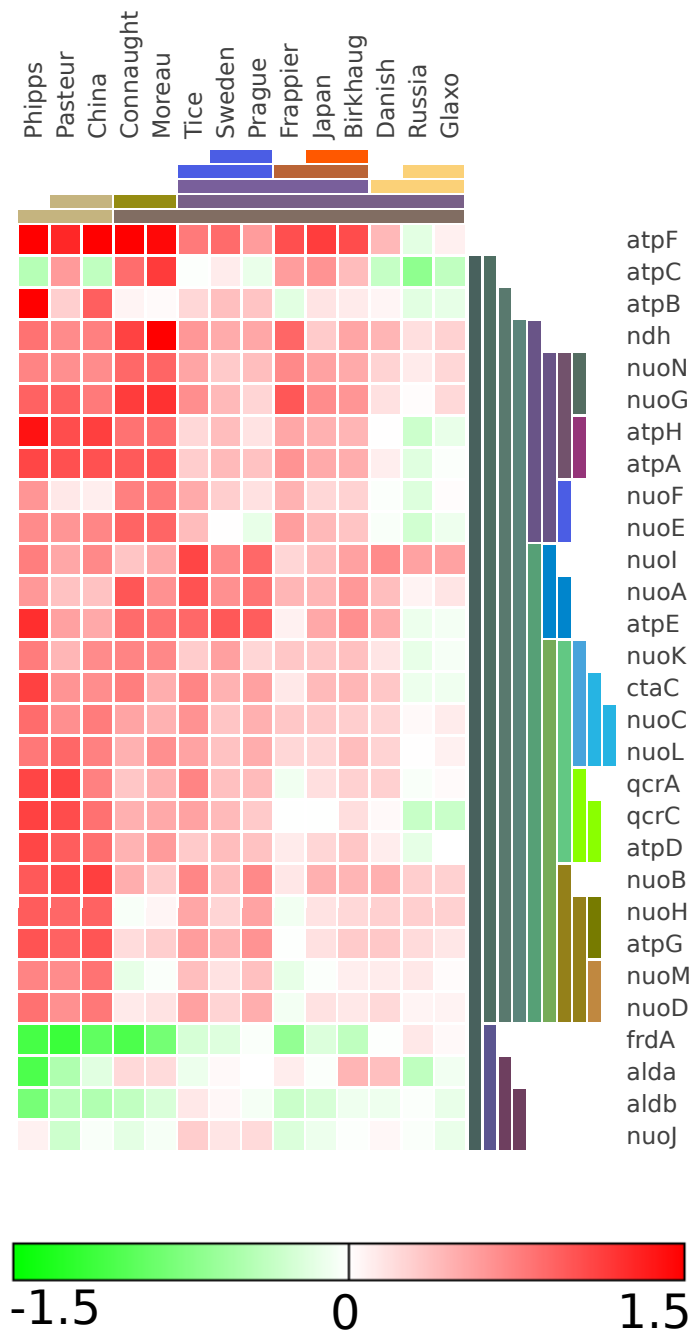

Figure S7

A

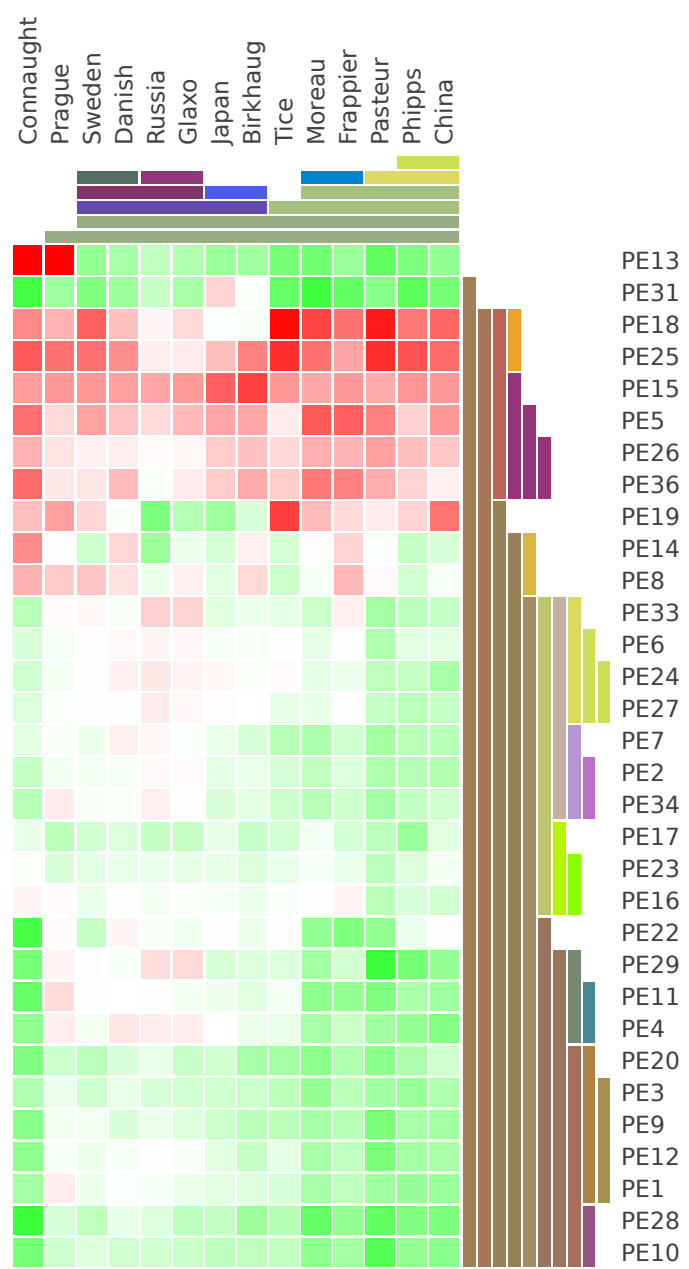

B

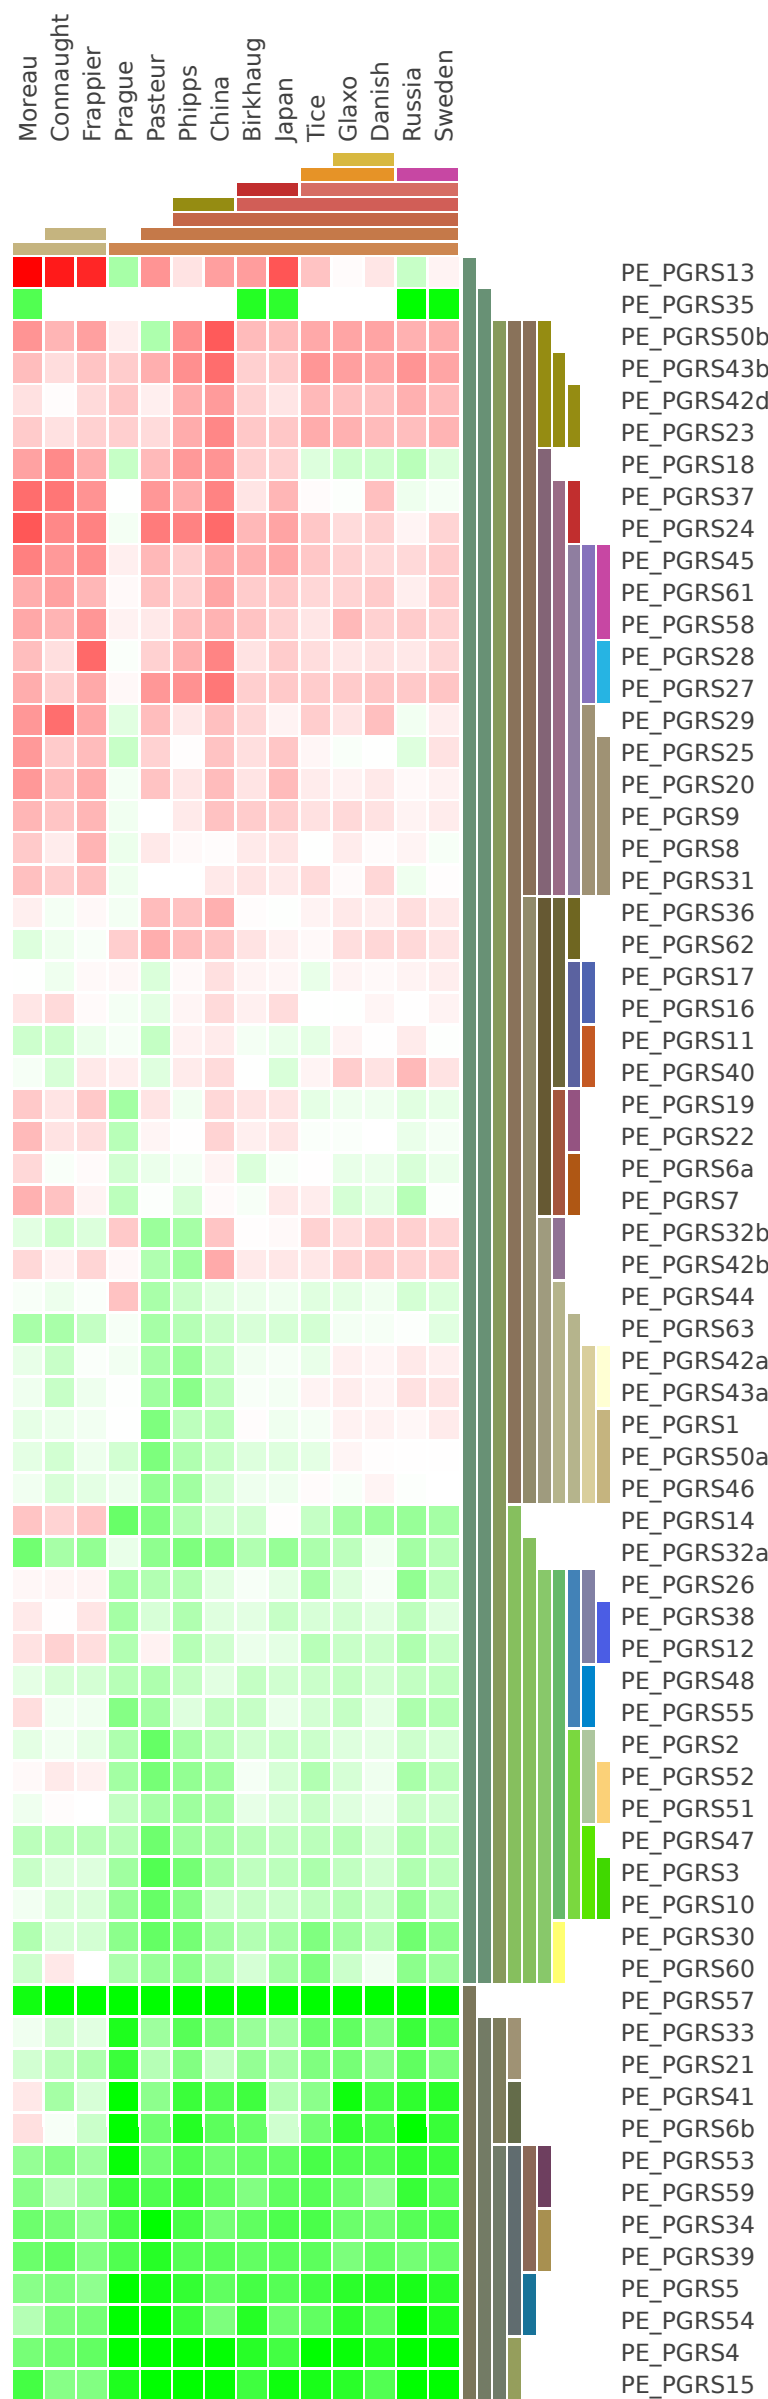

C

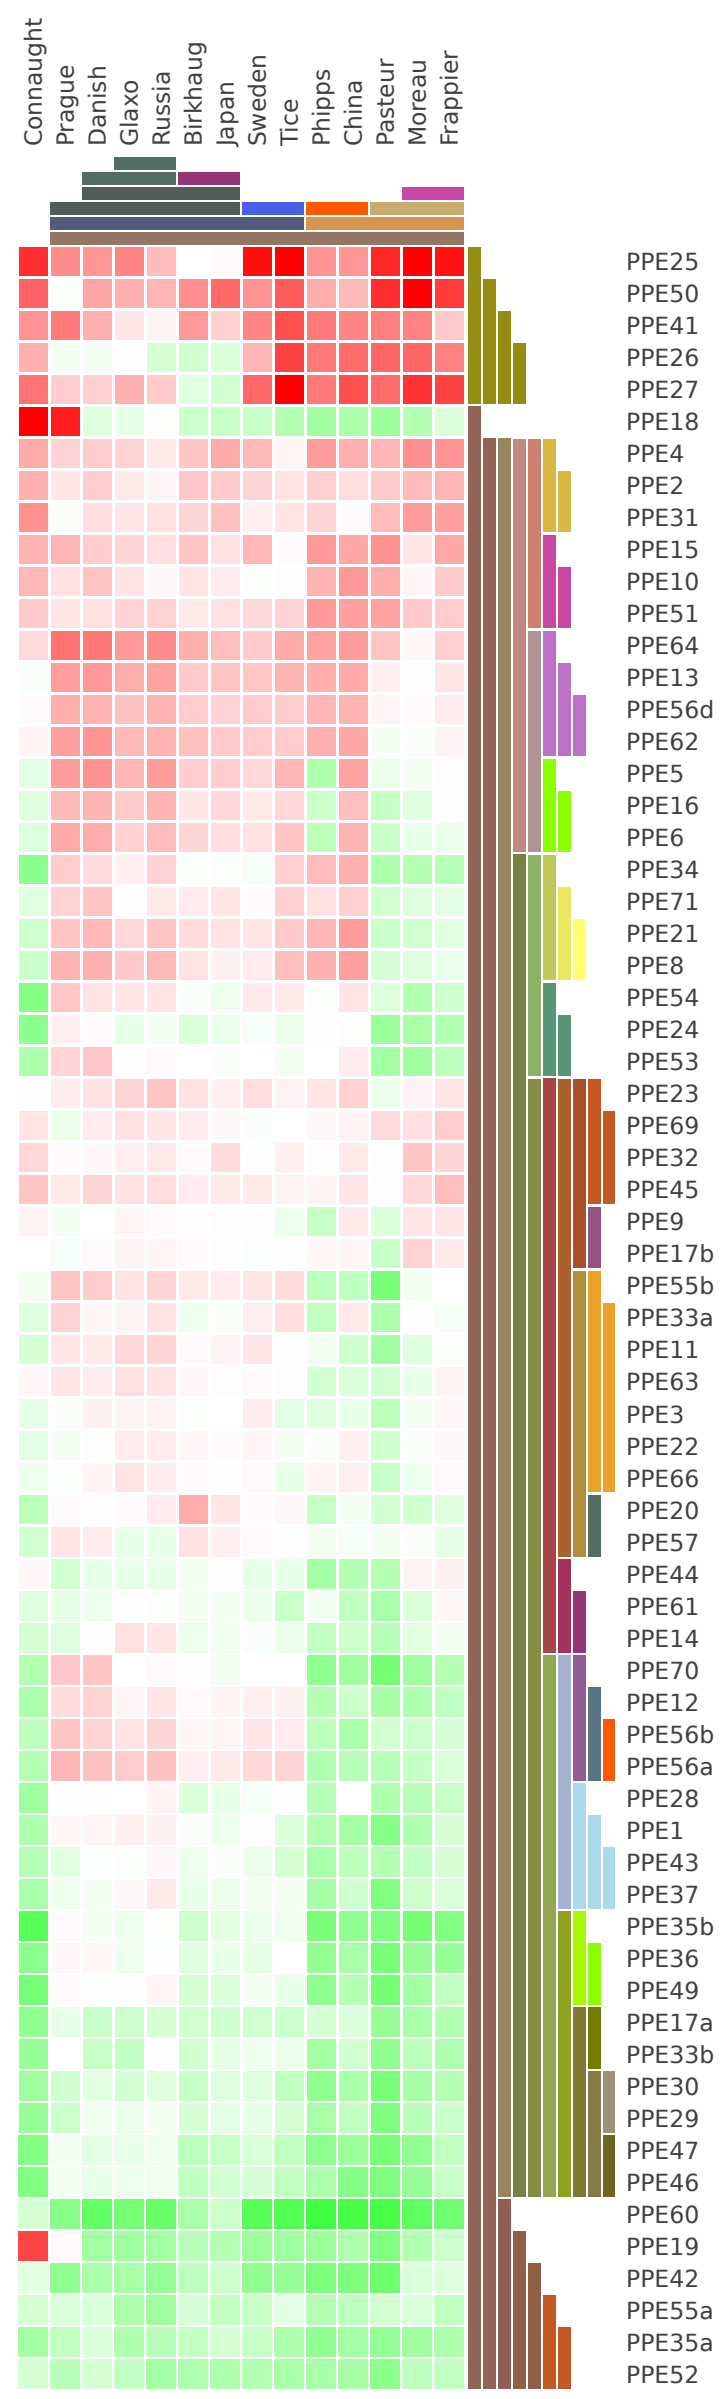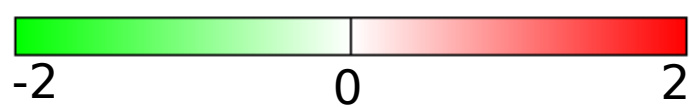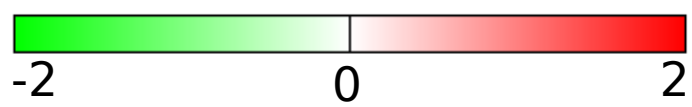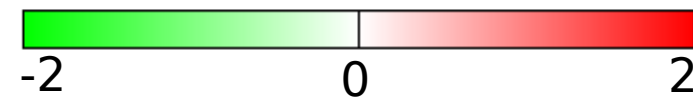

Figure S8

BCG\_Pasteur  
 BCG\_Phipps  
 BCG\_Connaught  
 BCG\_Frappier  
 BCG\_Tice  
 BCG\_Danish  
 BCG\_Glaxo  
 BCG\_China  
 BCG\_Prague  
 BCG\_Birkhaug  
 BCG\_Sweden  
 BCG\_Japan  
 BCG\_Moreau  
 BCG\_Russia

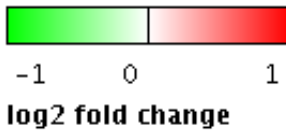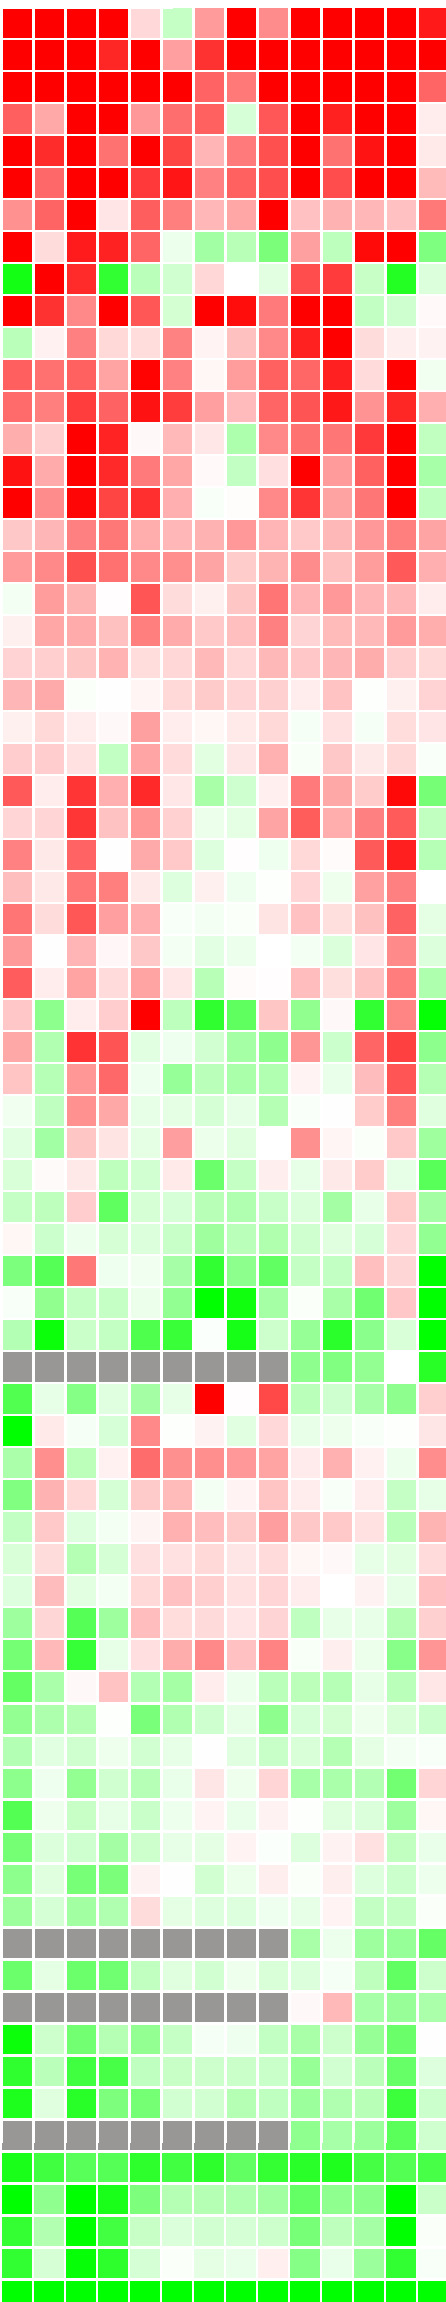

Rv0440-Mb0448  
 Rv3418c-Mb3452c  
 Rv3804c-Mb3834c  
 Rv0288-Mb0296  
 Rv1886c-Mb1918c  
 Rv2346c-Mb2375c  
 Rv1198-Mb1230  
 Rv2190c-Mb2213c  
 Rv2031c-Mb2057c  
 Rv3296-Mb3324  
 Rv0341-Mb0348  
 Rv1461-Mb1496  
 Rv0129c-Mb0134c  
 Rv0287-Mb0295  
 Rv0667-Mb0686  
 Rv2903c-Mb2927c  
 Rv1860-Mb1891  
 Rv0125-Mb0130  
 Rv2290-Mb2313  
 Rv1255c-Mb1287c  
 Rv0200-Mb0206  
 Rv0670-Mb0689  
 Rv1280c-Mb1311c  
 Rv1926c-Mb1961c  
 Rv1174c-Mb1207c  
 Rv2220-Mb2244  
 Rv0309-Mb0317  
 Rv0203-Mb0209  
 Rv2476c-Mb2503c  
 Rv2715-Mb2734  
 Rv2182c-Mb2204c  
 Rv1793-Mb1821  
 Rv3803c-Mb3833c  
 Rv1694-Mb1720  
 Rv2223c-Mb2247c  
 Rv2780-Mb2802  
 Rv3378c-Mb3412c  
 Rv3497c-Mb3527c  
 Rv3871-Mb3901  
 Rv3763-Mb3789  
 Rv1641-Mb1668  
 Rv3207c-Mb3232c  
 Rv1980c-Mb2002c  
 Rv3201c-Mb3226c  
 Rv2290-Mb2312  
 Rv1158c-Mb1189c  
 Rv3846-Mb3876  
 Rv3812-Mb3842  
 Rv3689-Mb3714  
 Rv0934-Mb0959  
 Rv1184c-Mb1216c  
 Rv3467-Mb3496  
 Rv1291c-Mb1323c  
 Rv3333c-Mb3366c  
 Rv3106-Mb3133  
 Rv2666-Mb2685  
 Rv3714c-Mb3741c  
 Rv1242-Mb1274  
 Rv2945c-Mb2970c  
 Rv2780-Mb2803  
 Rv1987-Mb2009  
 Rv2878c-Mb2903c  
 Rv1986-Mb2008  
 Rv0222-Mb3545  
 Rv1623c-Mb1649c  
 Rv3017c-Mb3042c  
 Rv1985c-Mb2007c  
 Rv1945-Mb1980  
 Rv2823c-Mb2847c  
 Rv3019c-Mb3045c  
 Rv0589-Mb0604  
 Rv2875-Mb2900

Figure S9

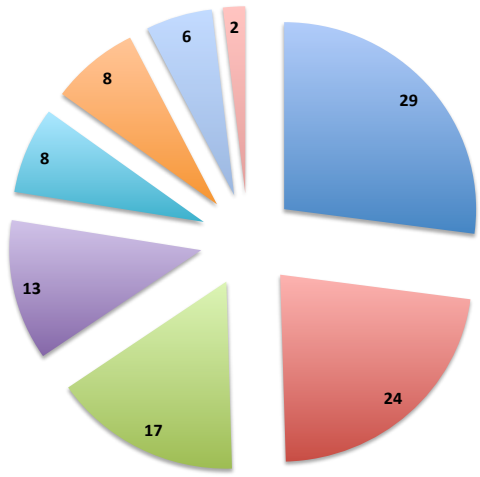

Japan

- information pathways
- intermediary metabolism and respiration
- conserved hypotheticals
- cell wall and cell processes
- lipid metabolism
- regulatory proteins
- virulence, detoxification, adaptation
- conserved hypotheticals with an orthologue in *M. tuberculosis*
- PE/PPE

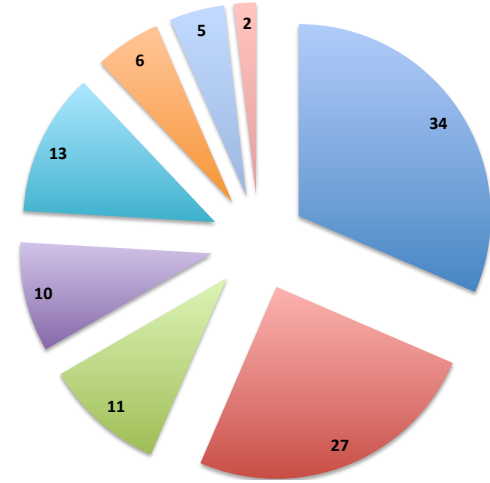

Birkhaug

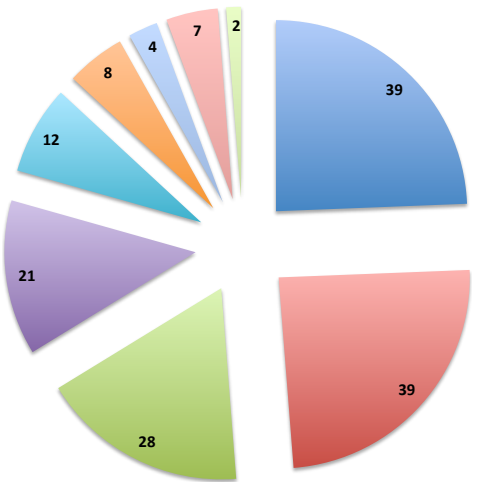

Pasteur

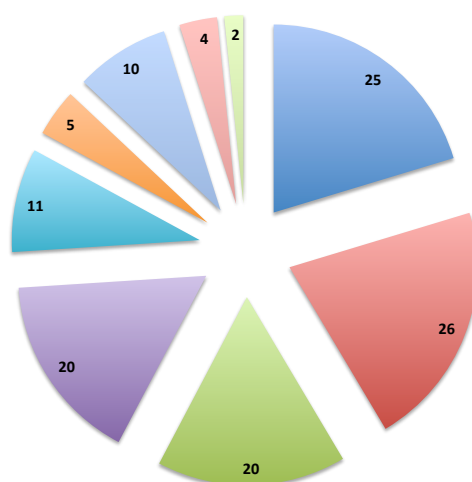

Phipps

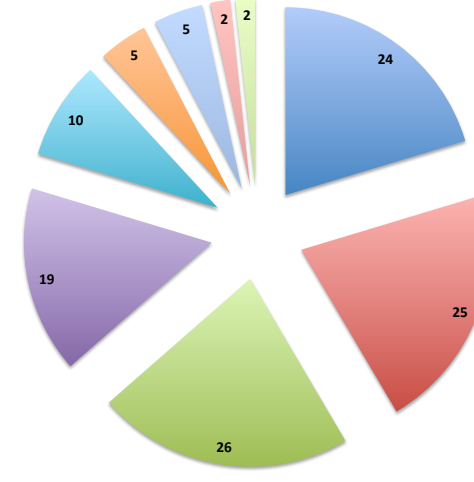

Danish

Figure S10
